# Supplementary material for: Images of the unseen: extrapolating visual representations for abstract and concrete words in a data-driven computational model
Source: Springer Nature journal article supplement (doi:10.1007/s00426-020-01429-7), 2020-11-12
Supplement: MOESM1 [file 18583028]

# Experiment 1 (prototype model)

freighter

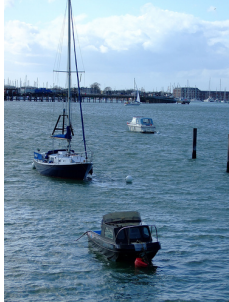

*predicted*

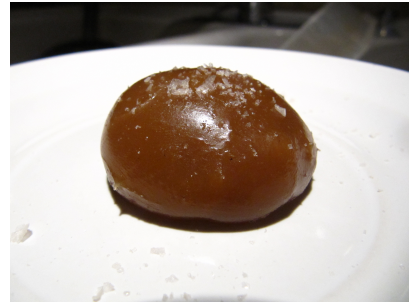

*random control*

pocket

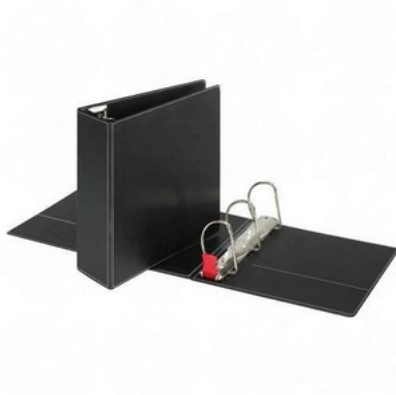

*predicted*

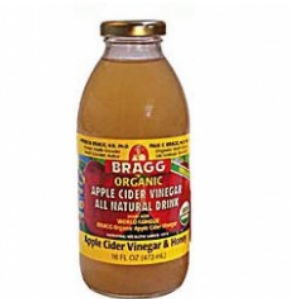

*random control*

uncle

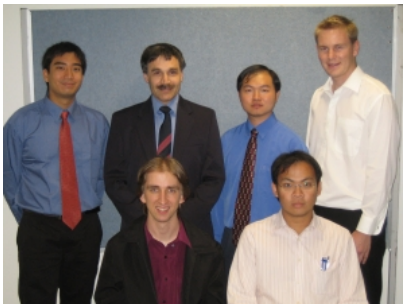

*predicted*

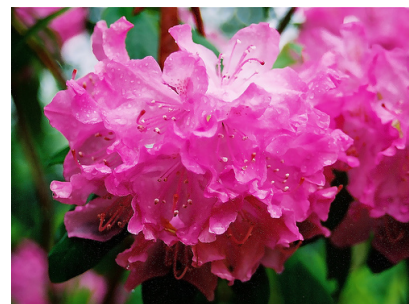

*random control*

performer

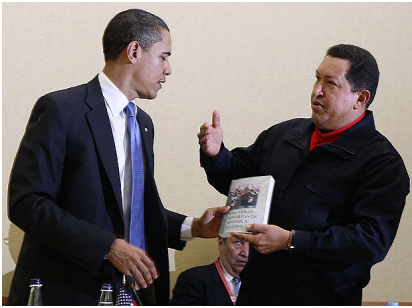

*predicted*

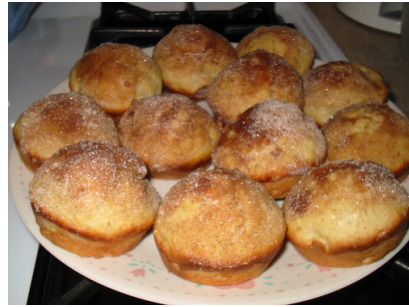

*random control*

whiskey

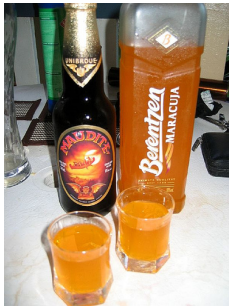

*predicted*

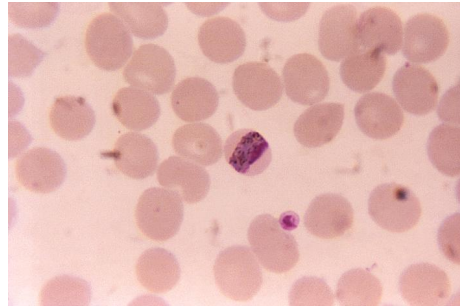

*random control*

hamburger

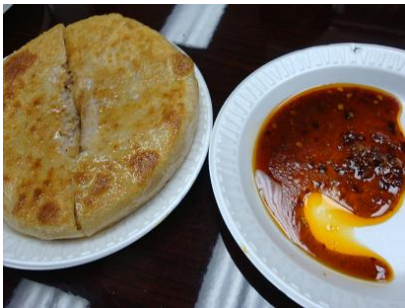

*predicted*

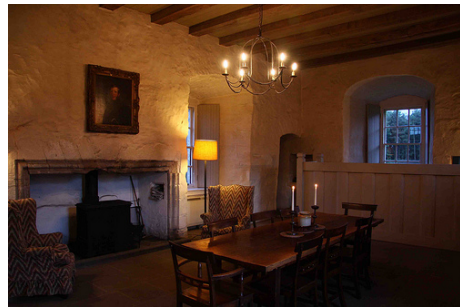

*random control*

**barb**

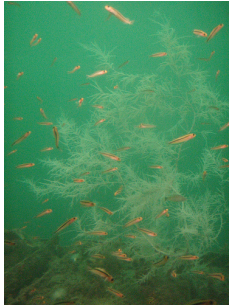

*predicted*

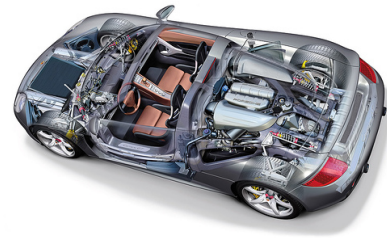

*random control*

**cushion**

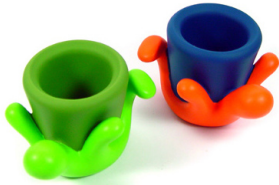

*predicted*

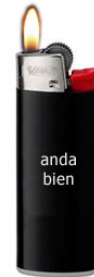

*random control*

**spear**

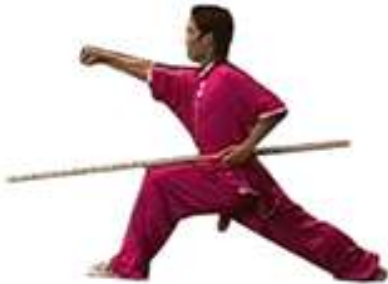

*predicted*

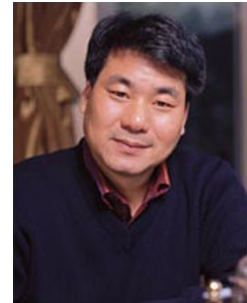

*random control*

engineer

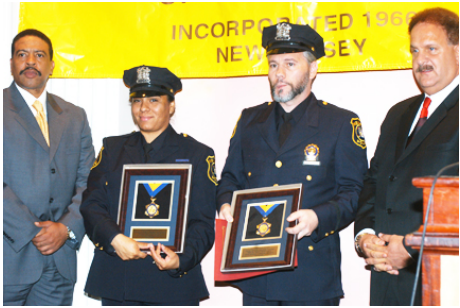

*predicted*

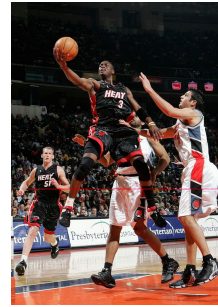

*random control*

cheesecake

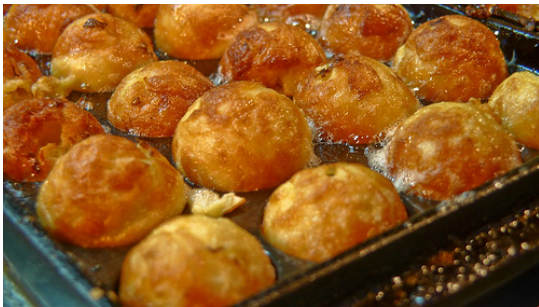

*predicted*

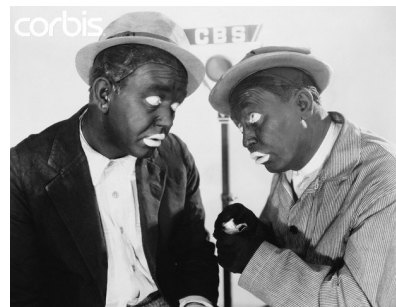

*random control*

ribbon

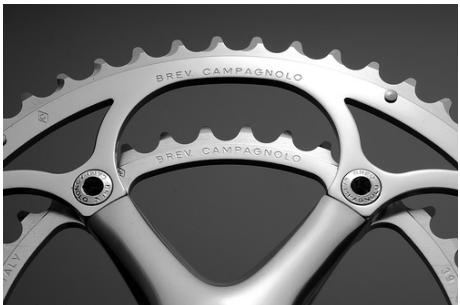

*predicted*

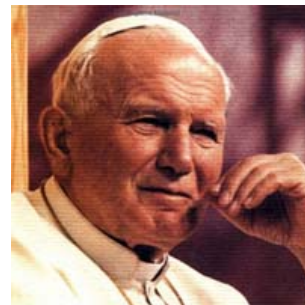

*random control*

cockroach

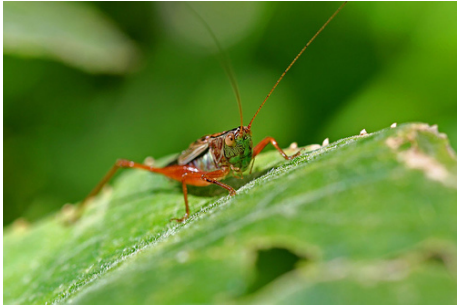

*predicted*

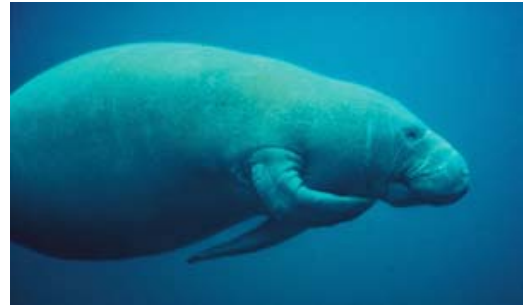

*random control*

stallion

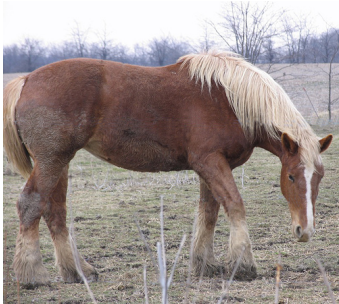

*predicted*

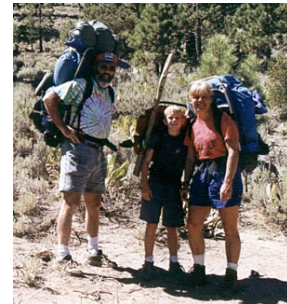

*random control*

crank

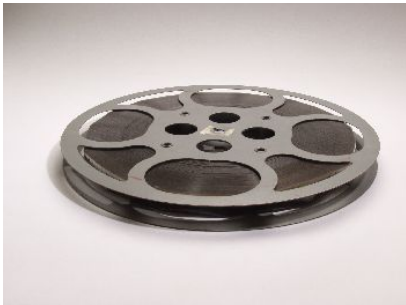

*predicted*

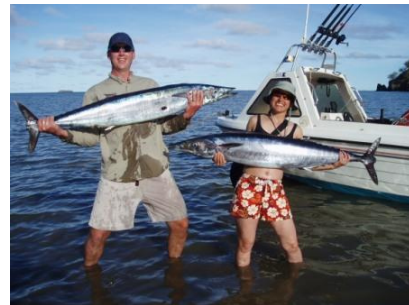

*random control*

cloth

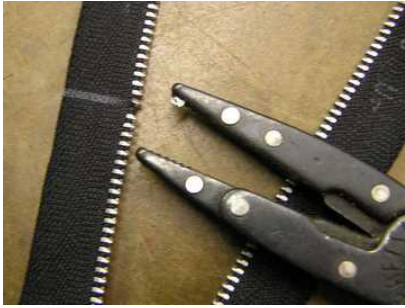

*predicted*

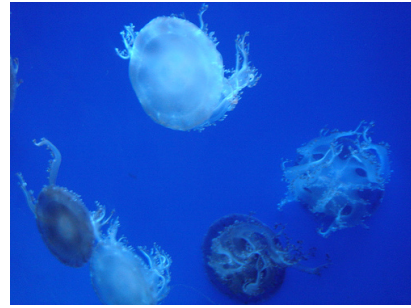

*random control*

housewife

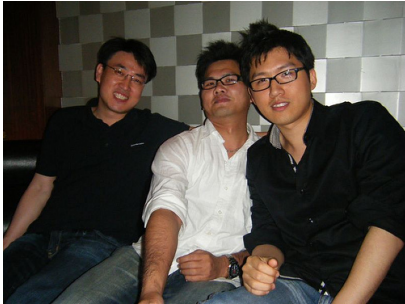

*predicted*

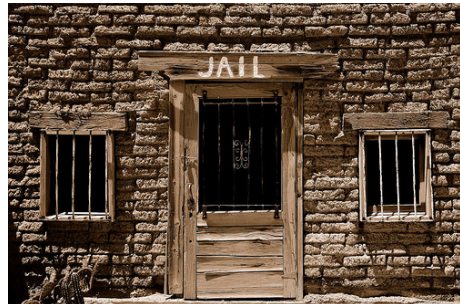

*random control*

ivy

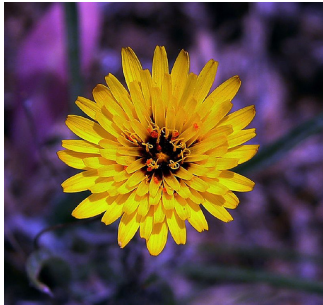

*predicted*

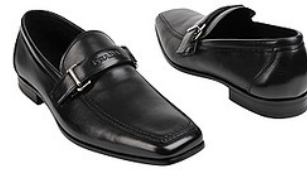

*random control*

tomb

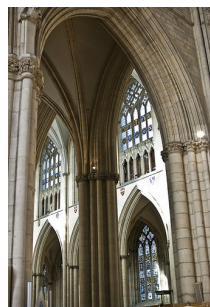

*predicted*

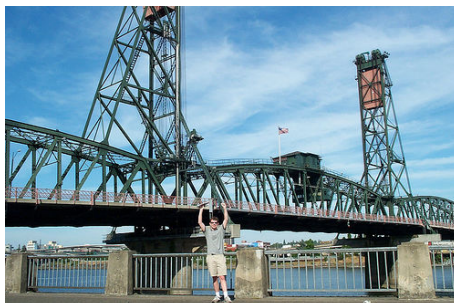

*random control*

leash

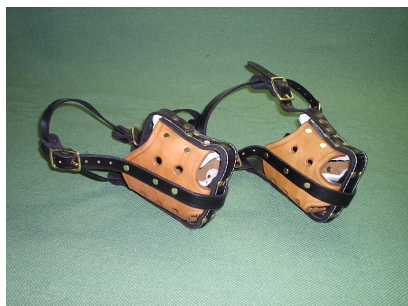

*predicted*

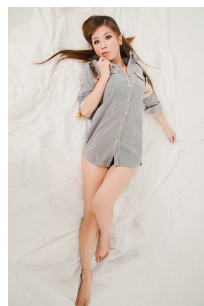

*random control*

cactus

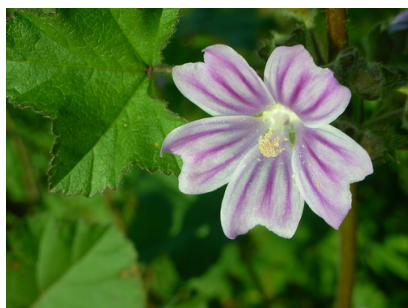

*predicted*

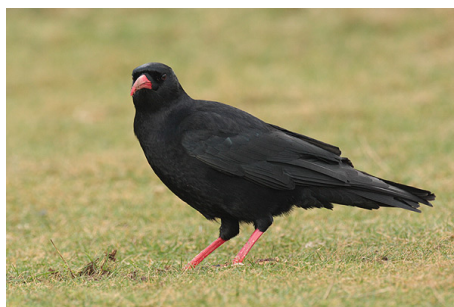

*random control*

rug

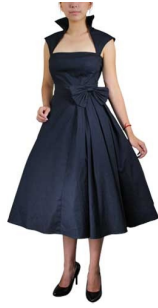

*predicted*

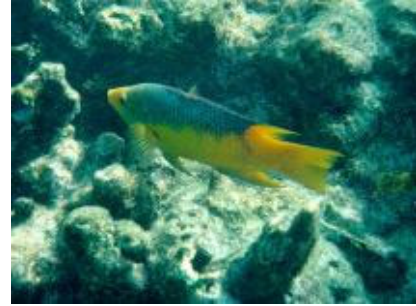

*random control*

chimp

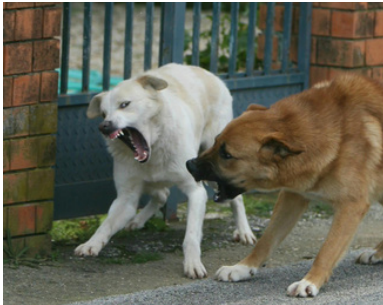

*predicted*

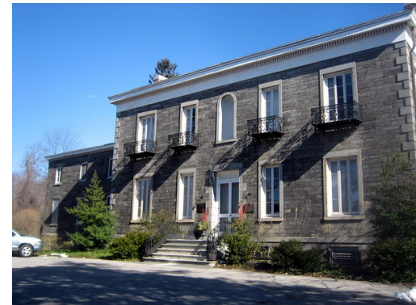

*random control*

scenery

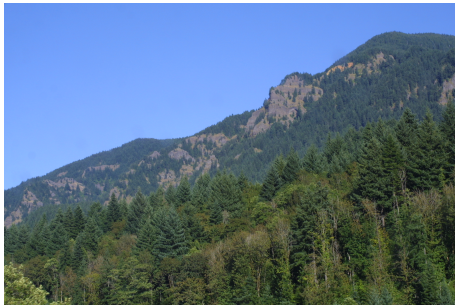

*predicted*

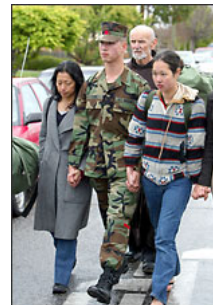

*random control*



writing

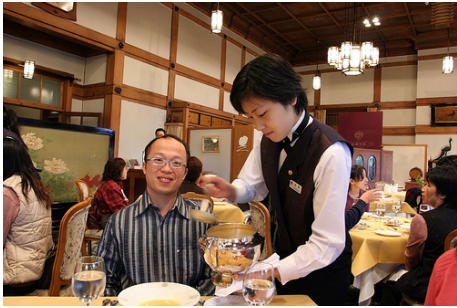

*predicted*

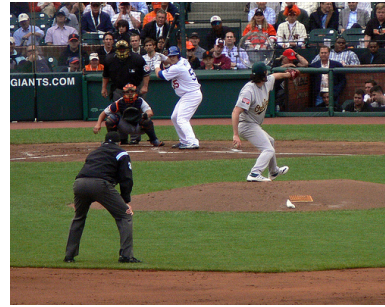

*random control*

address

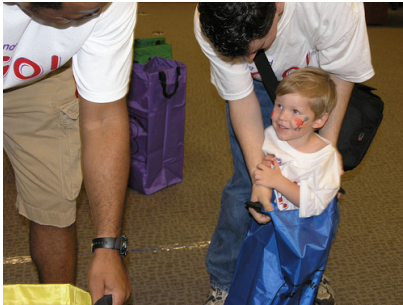

*predicted*

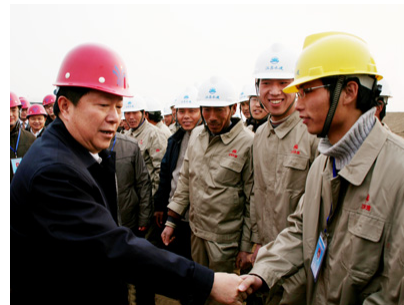

*random control*

killing

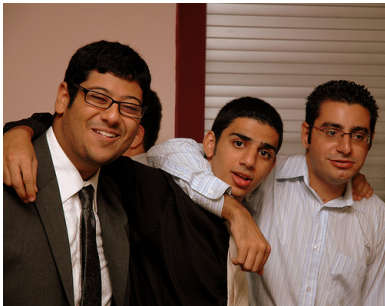

*predicted*

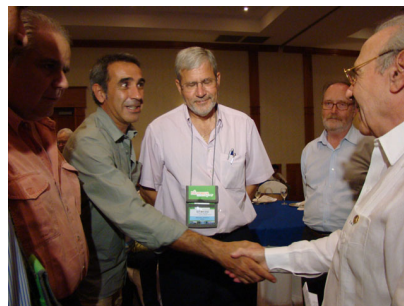

*random control*

**greeting**

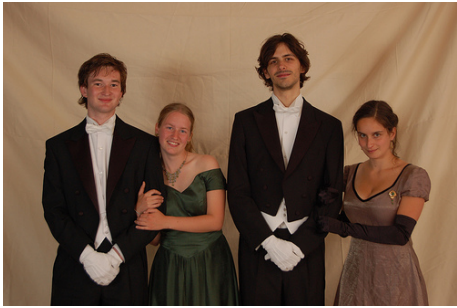

*predicted*

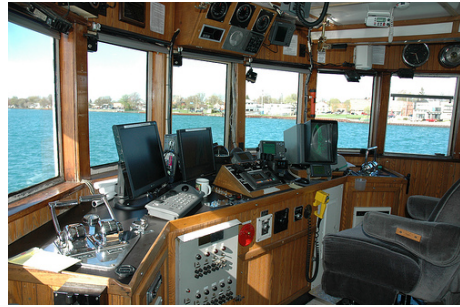

*random control*

**paragraph**

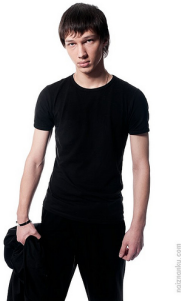

*predicted*

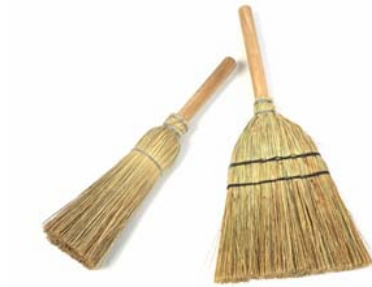

*random control*

**bent**

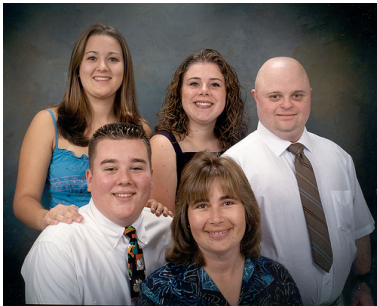

*predicted*

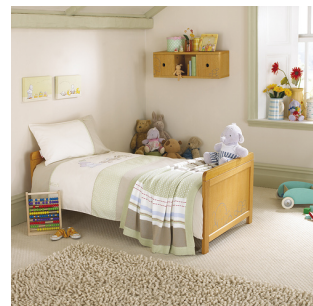

*random control*

dime

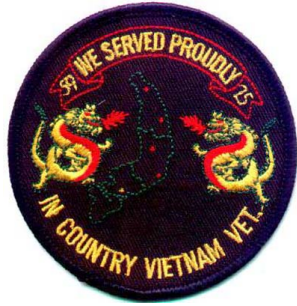

*predicted*

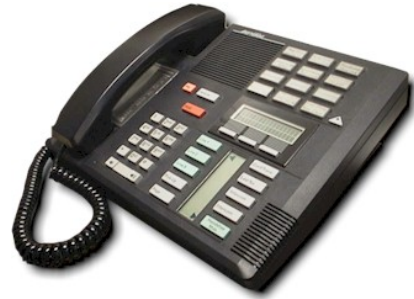

*random control*

filth

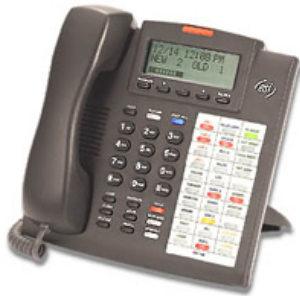

*predicted*

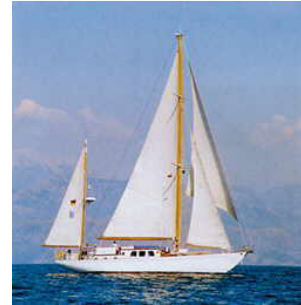

*random control*

mob

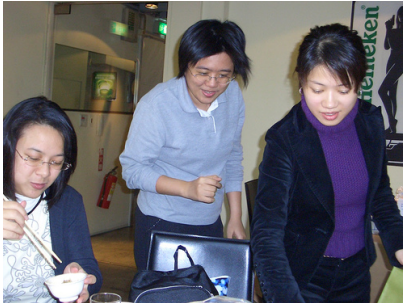

*predicted*

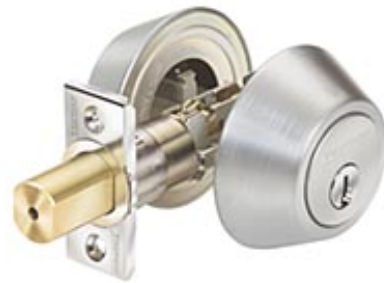

*random control*

sedative

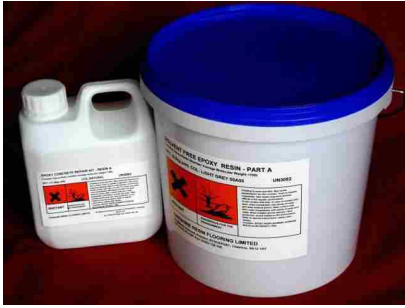

*predicted*

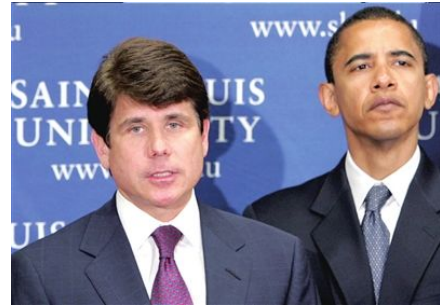

*random control*

plague

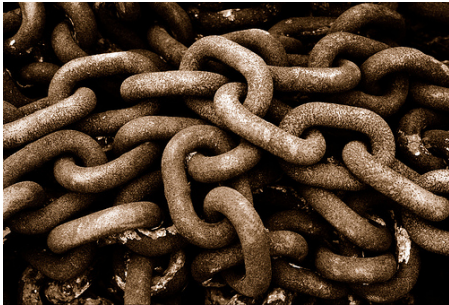

*predicted*

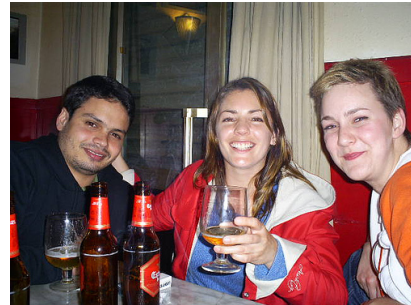

*random control*

petition

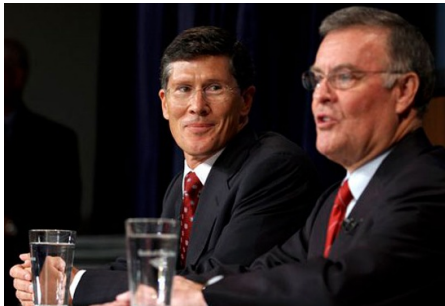

*predicted*

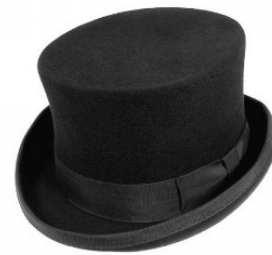

*random control*

asthma

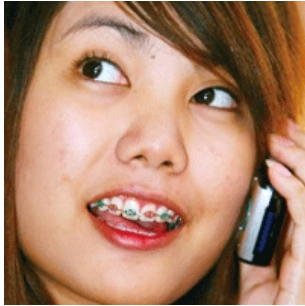

*predicted*

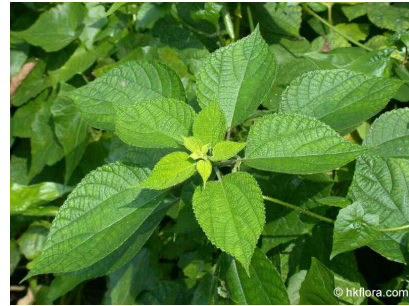

*random control*

scrap

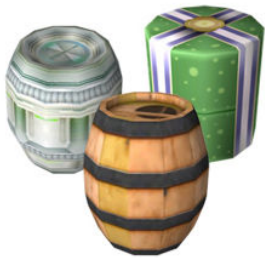

*predicted*

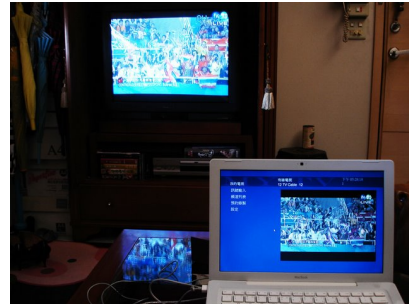

*random control*

gram

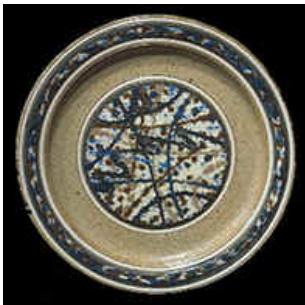

*predicted*

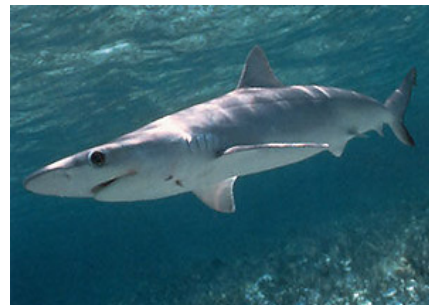

*random control*

biology

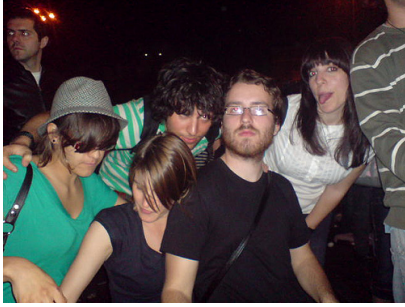

*predicted*

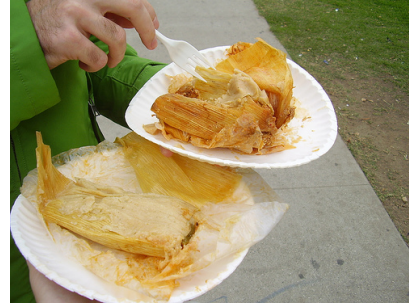

*random control*

operation

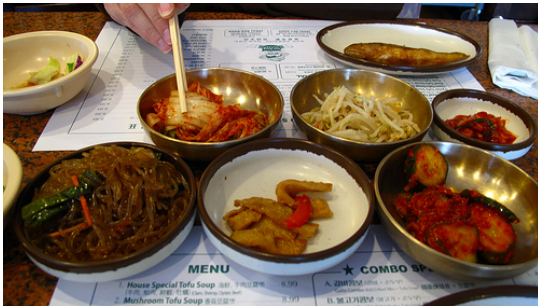

*predicted*

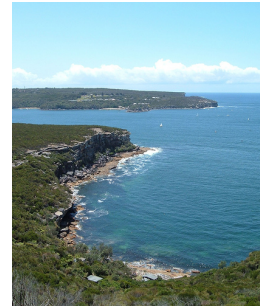

*random control*

bruise

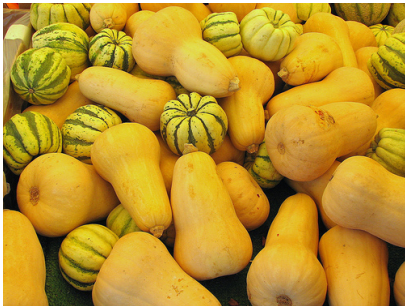

*predicted*

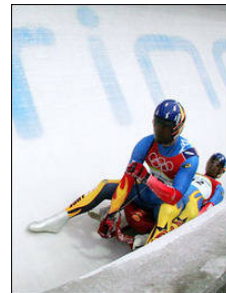

Reuters / Pawel Kopczynski

*random control*

symphony

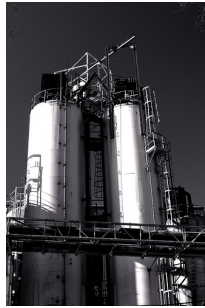

*predicted*

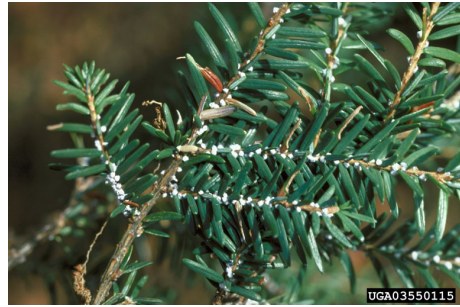

*random control*

aspirin

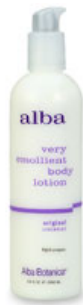

*predicted*

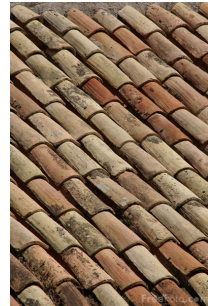

*random control*

strike

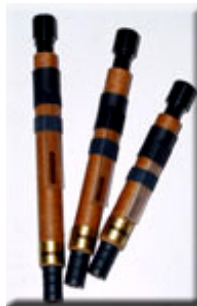

*predicted*

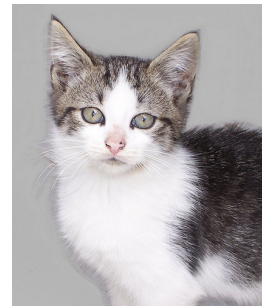

*random control*

**bible**

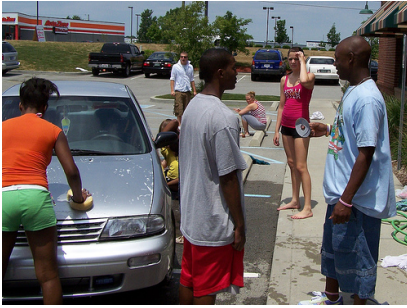

*predicted*

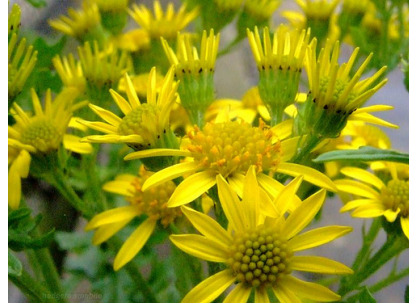

*random control*

**land**

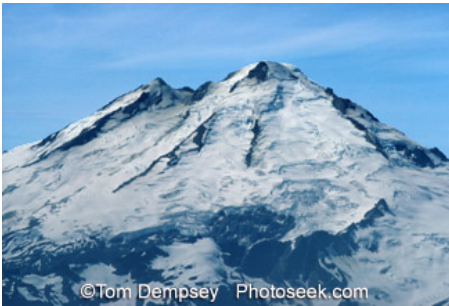

*predicted*

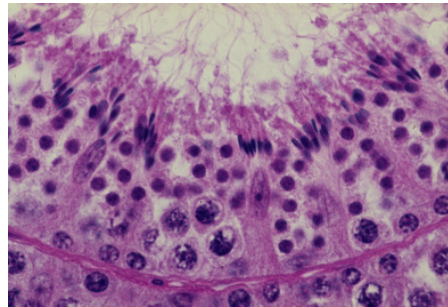

*random control*

**poison**

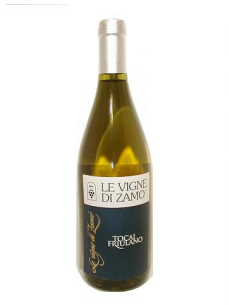

*predicted*

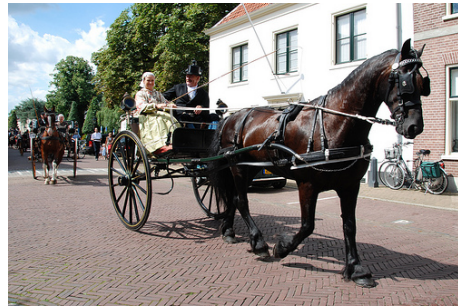

*random control*



flame

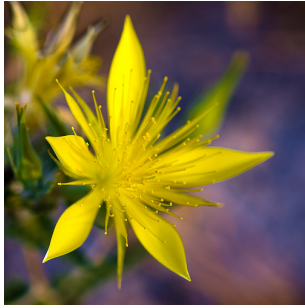

*predicted*

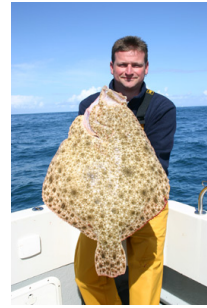

*random control*

playboy

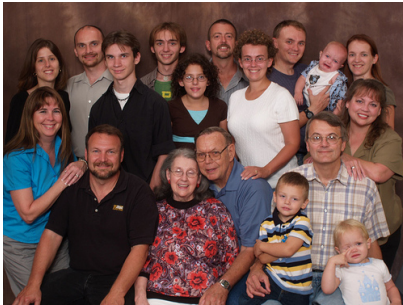

*predicted*

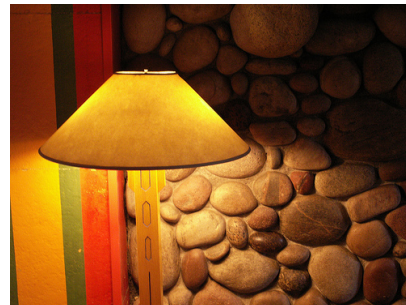

*random control*

traps

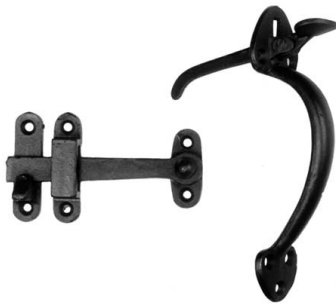

*predicted*

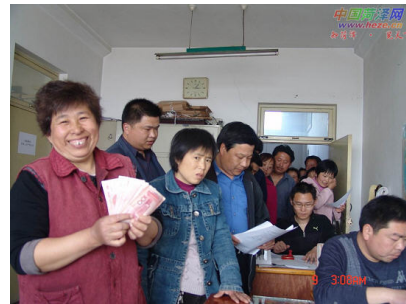

*random control*

scout

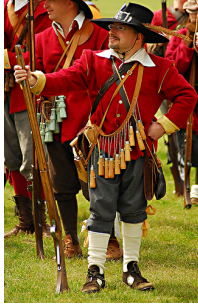

*predicted*

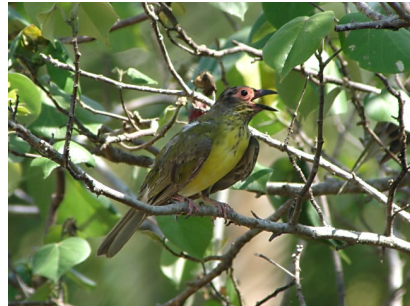

*random control*

cardboard

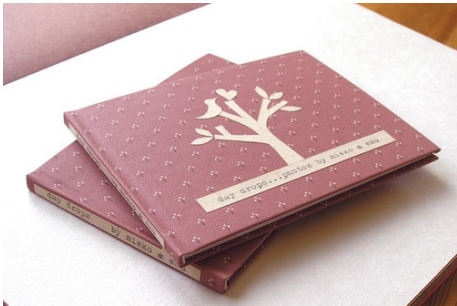

*predicted*

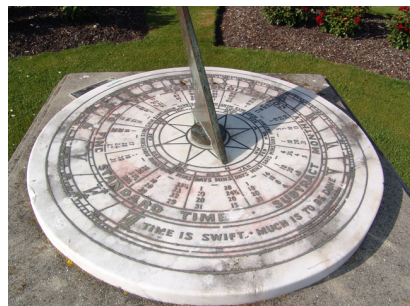

*random control*

archives

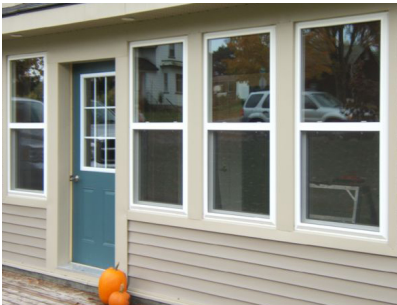

*predicted*

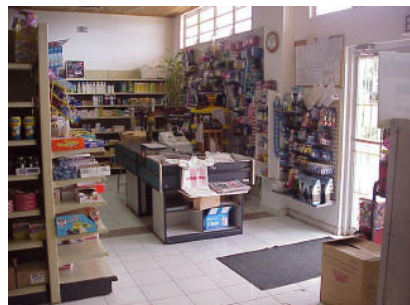

*random control*

cutting

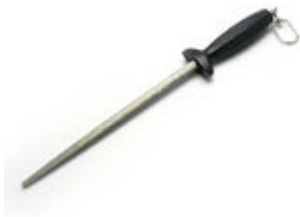

*predicted*

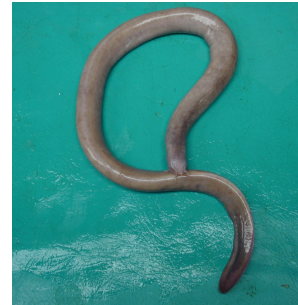

*random control*

snack

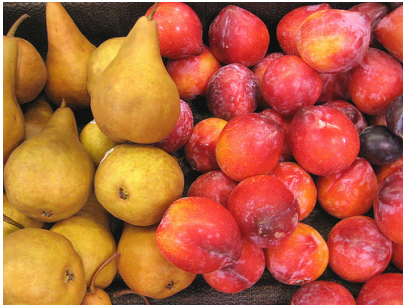

*predicted*

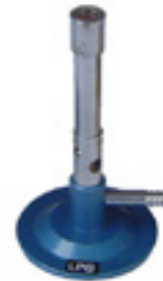

*random control*

piglet

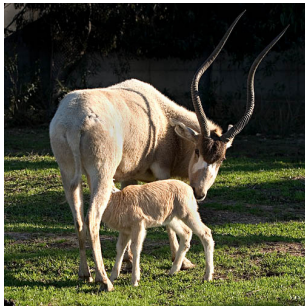

*predicted*

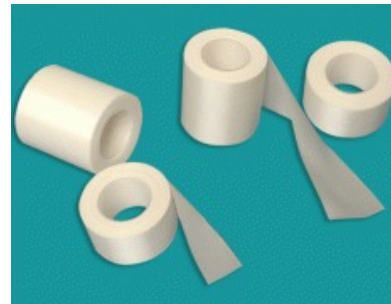

*random control*

warden

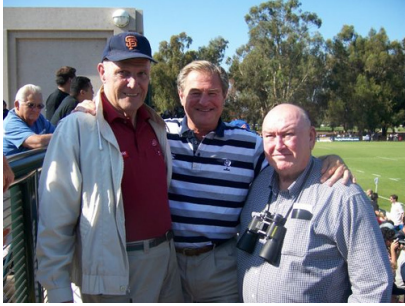

*predicted*

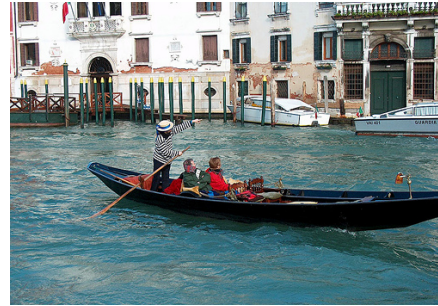

*random control*

chop

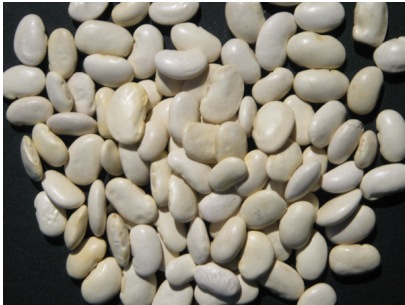

*predicted*

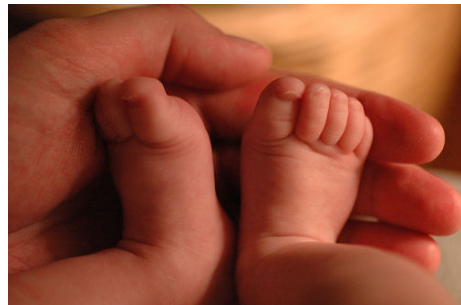

*random control*

critic

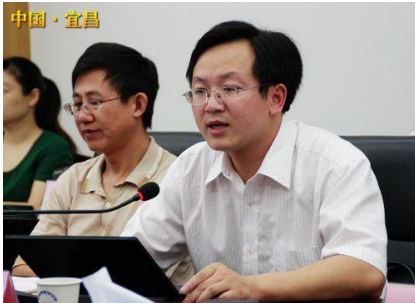

*predicted*

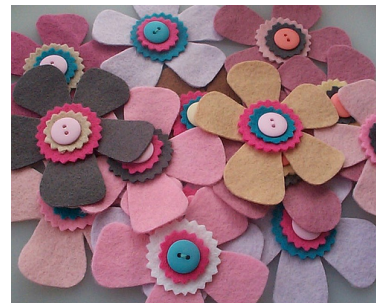

*random control*

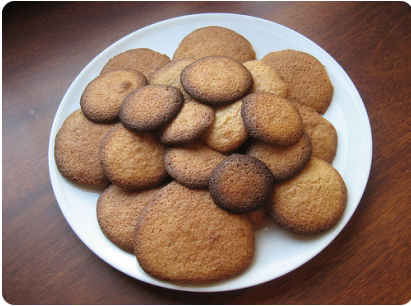

*predicted*

**muffin**

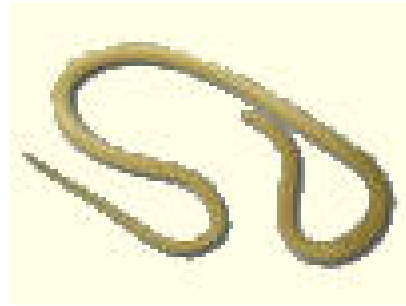

*random control*

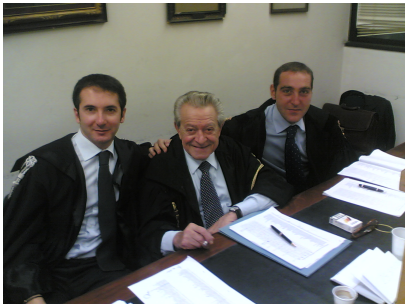

*predicted*

**assistant**

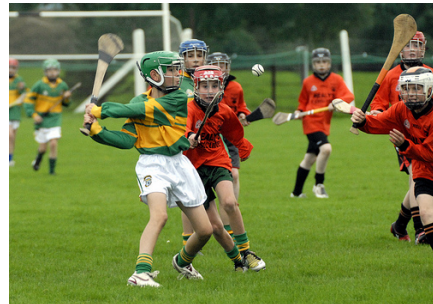

*random control*

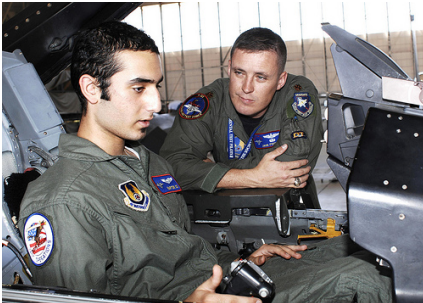

*predicted*

**paramedic**

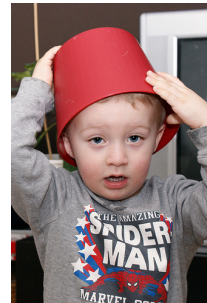

*random control*

**auntie**

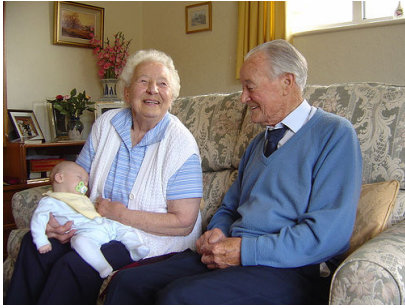

*predicted*

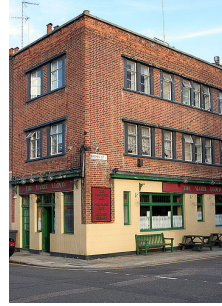

*random control*

**preacher**

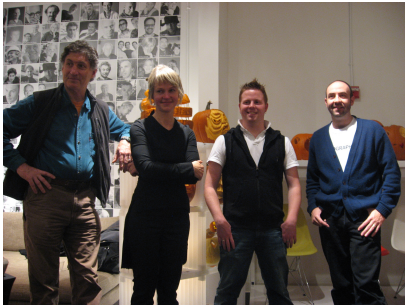

*predicted*

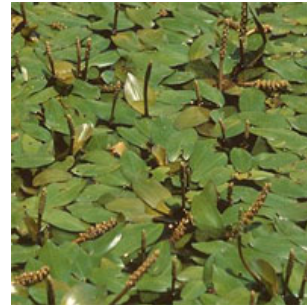

*random control*

**skeleton**

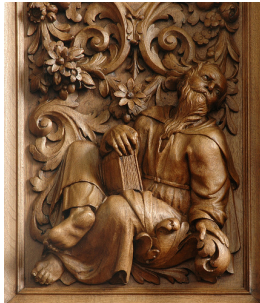

*predicted*

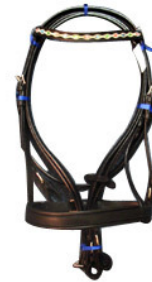

*random control*

lily

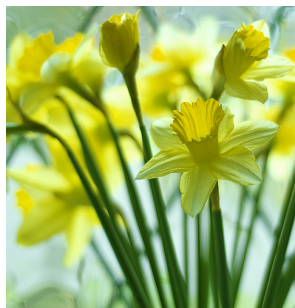

*predicted*

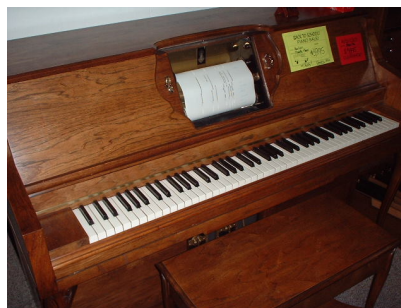

*random control*

leather

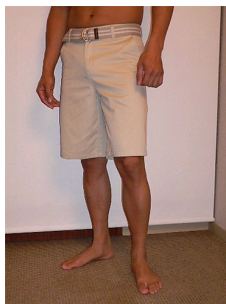

*predicted*

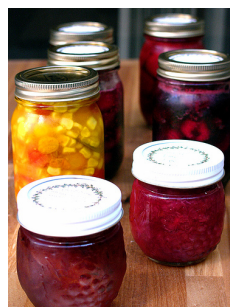

*random control*

ally

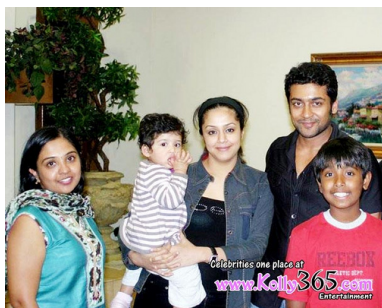

*predicted*

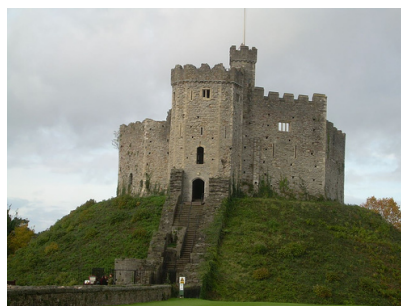

*random control*

bout

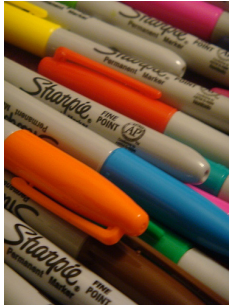

*predicted*

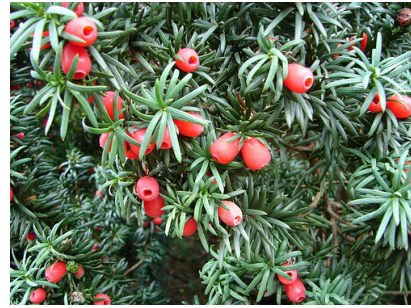

*random control*

breed

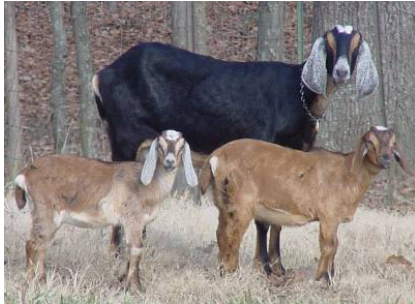

*predicted*

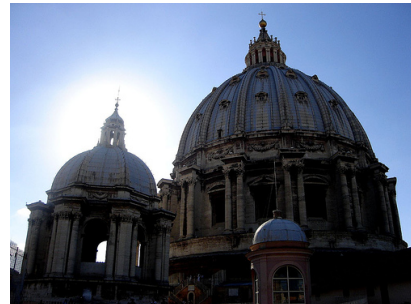

*random control*

childhood

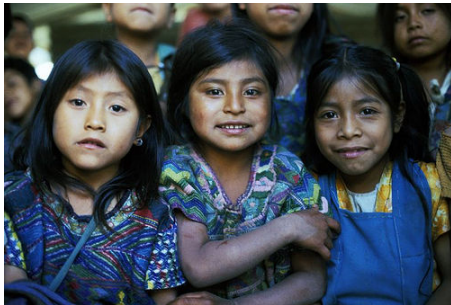

*predicted*

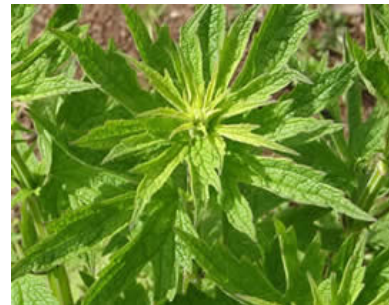

*random control*



corporal

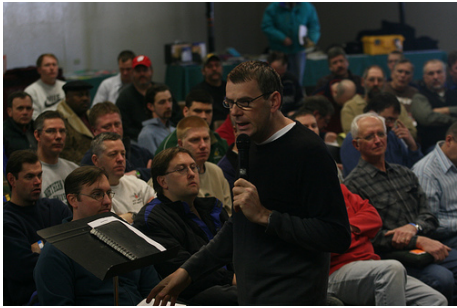

*predicted*

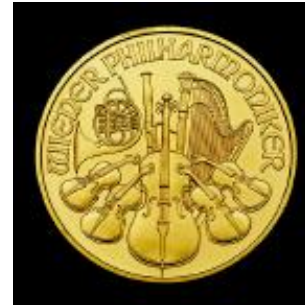

*random control*

defensive

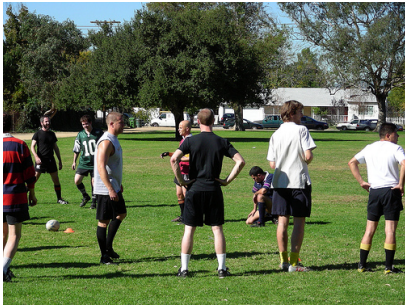

*predicted*

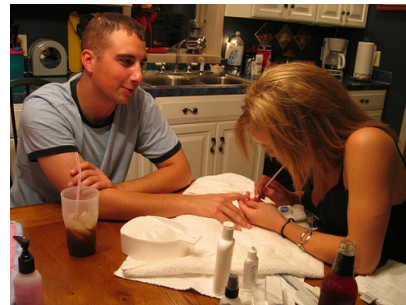

*random control*

department

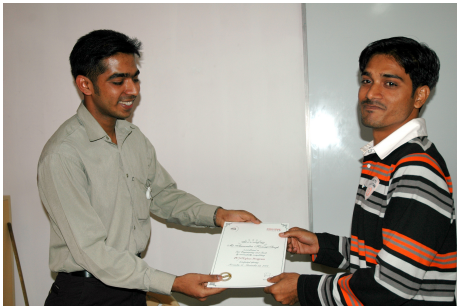

*predicted*

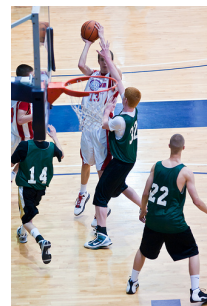

*random control*

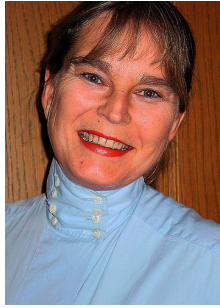

*predicted*

fit

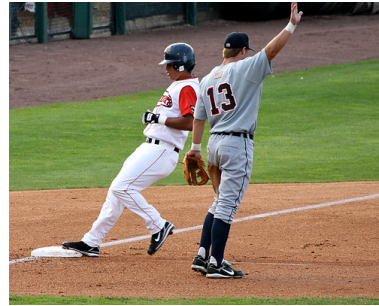

*random control*

fore

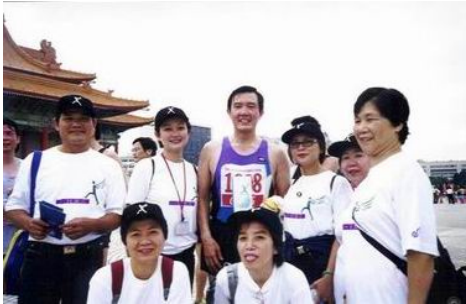

*predicted*

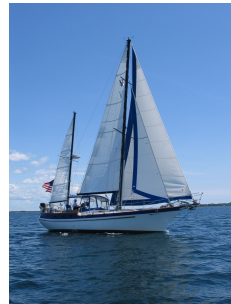

*random control*

gall

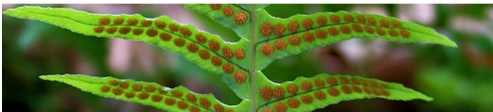

*predicted*

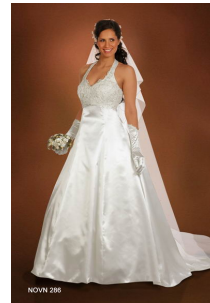

*random control*

graduating

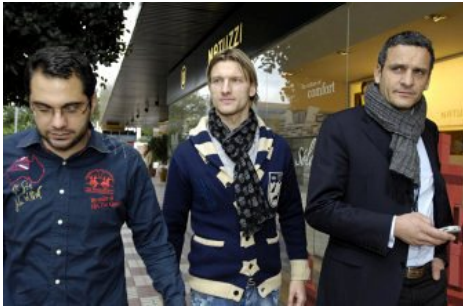

*predicted*

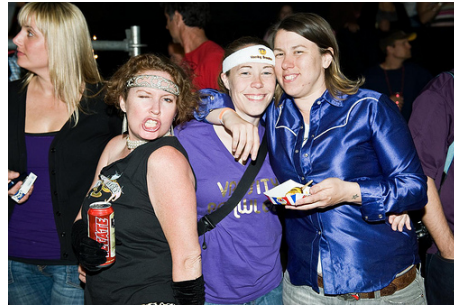

*random control*

journalism

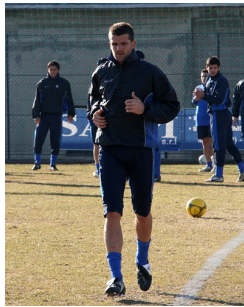

*predicted*

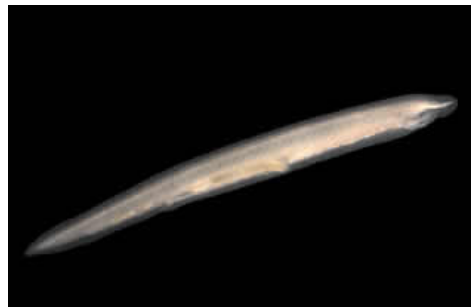

*random control*

main

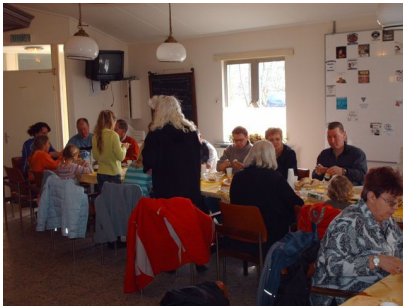

*predicted*

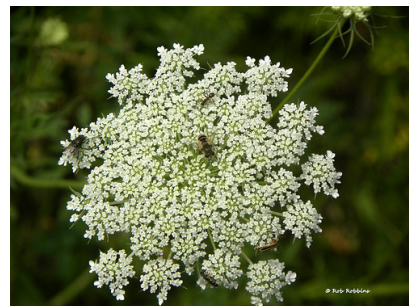

*random control*

member

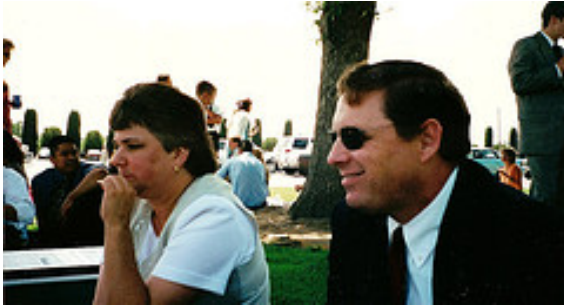

*predicted*

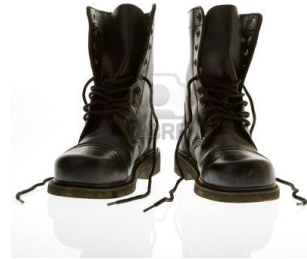

*random control*

outsider

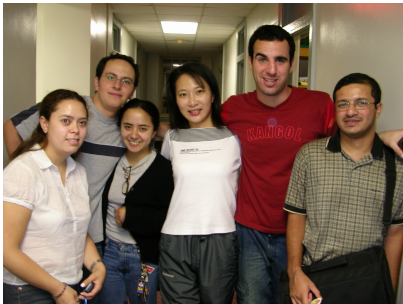

*predicted*

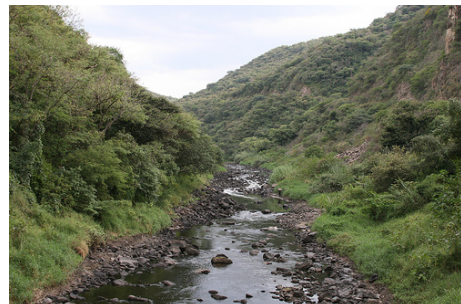

*random control*

position

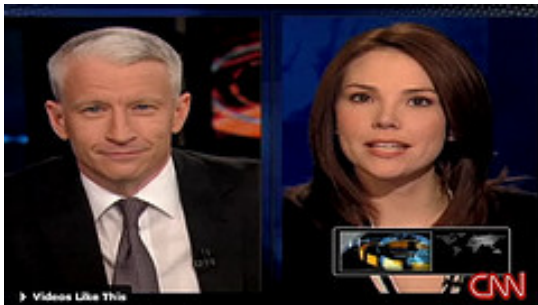

*predicted*

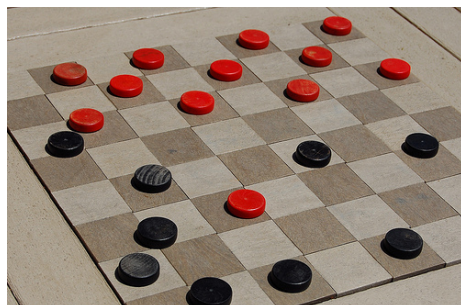

*random control*

salvage

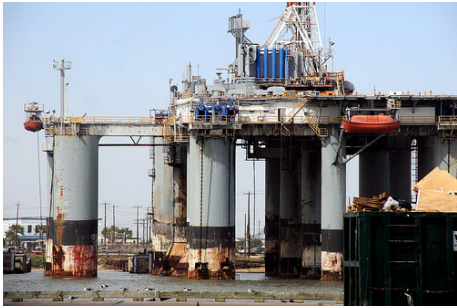

*predicted*

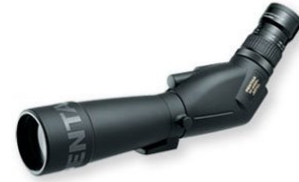

*random control*

scoundrel

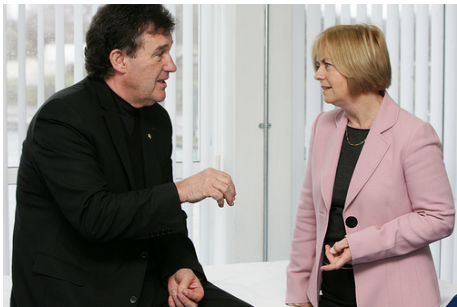

*predicted*

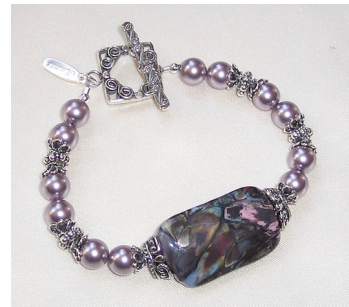

*random control*

sight

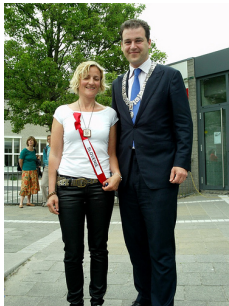

*predicted*

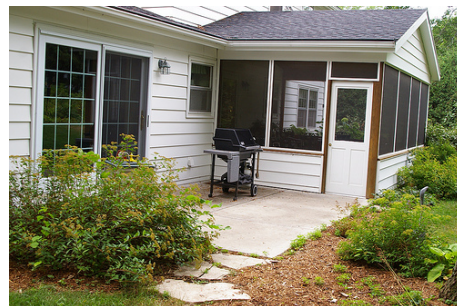

*random control*

starboard

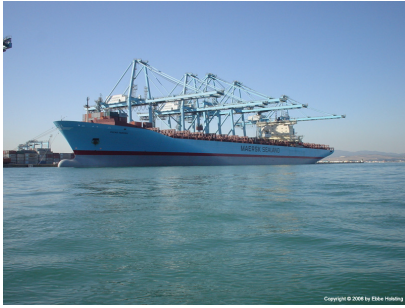

*predicted*

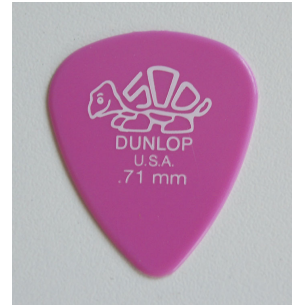

*random control*

vice

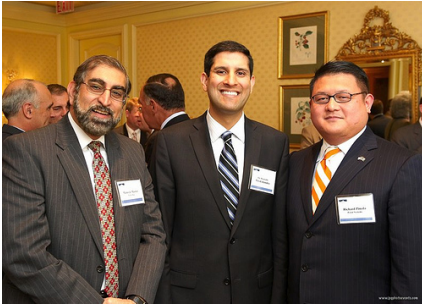

*predicted*

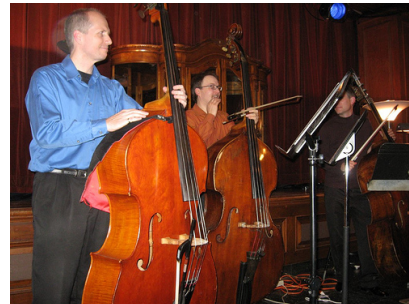

*random control*

vogue

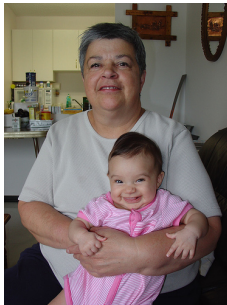

*predicted*

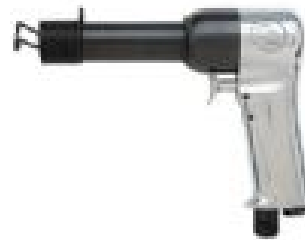

*random control*

wild

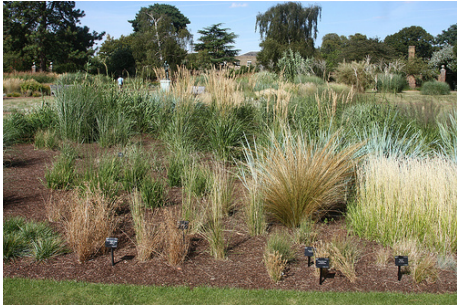

*predicted*

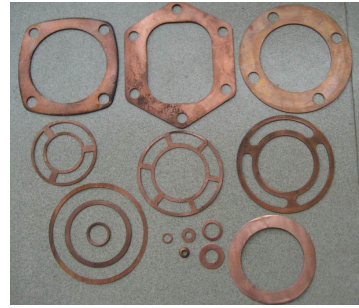

*random control*

virtue

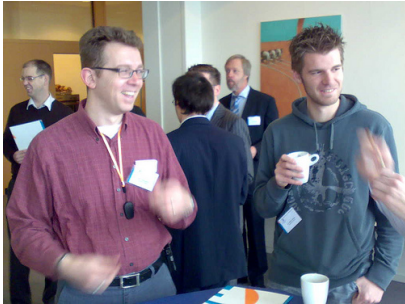

*predicted*

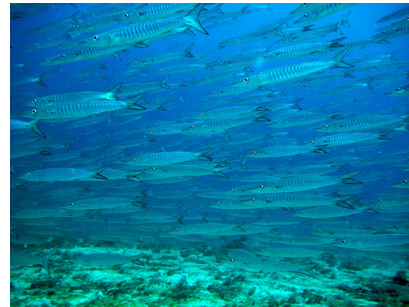

*random control*

perfection

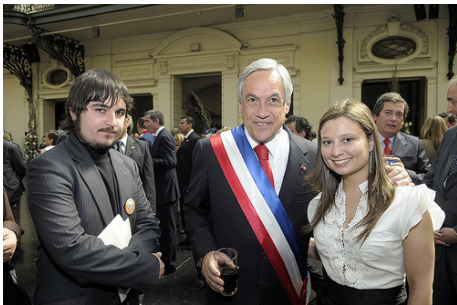

*predicted*

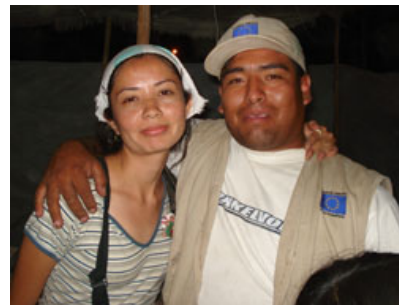

*random control*

**awareness**

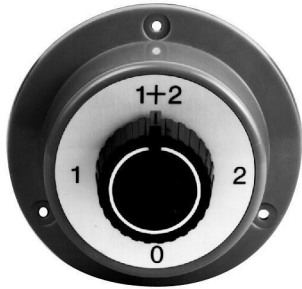

*predicted*

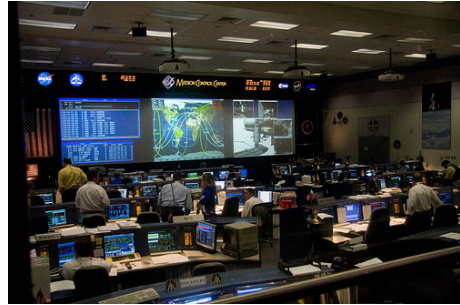

*random control*

**madness**

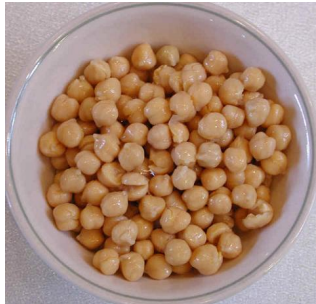

*predicted*

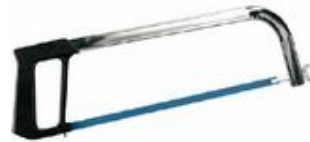

*random control*

**determination**

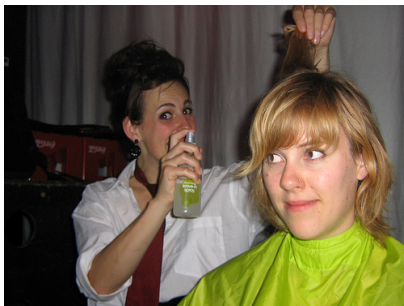

*predicted*

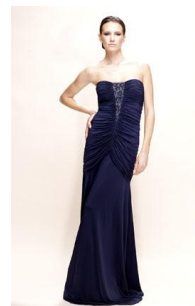

*random control*



**metaphor**

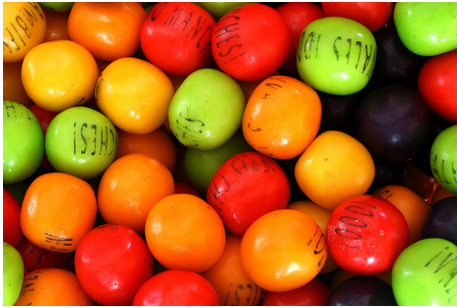

*predicted*

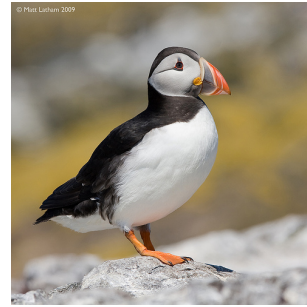

*random control*

**curiosity**

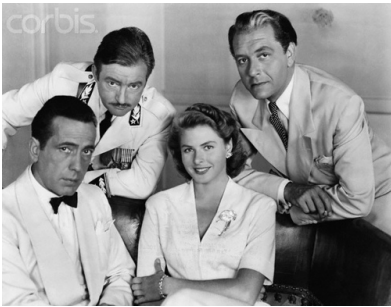

*predicted*

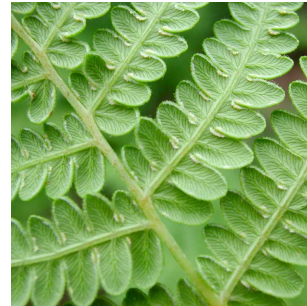

*random control*

**destiny**

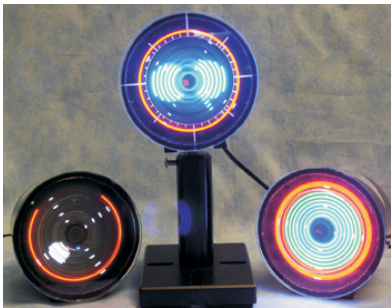

*predicted*

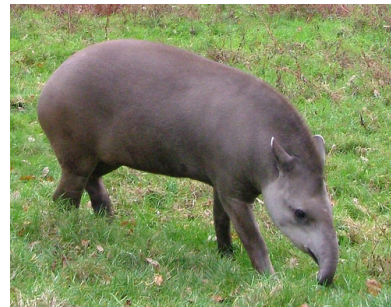

*random control*

**opportunity**

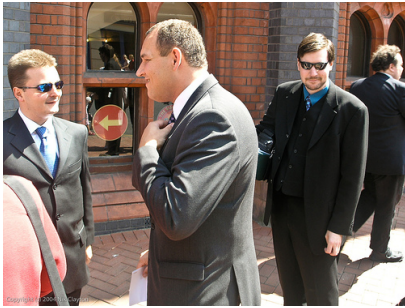

*predicted*

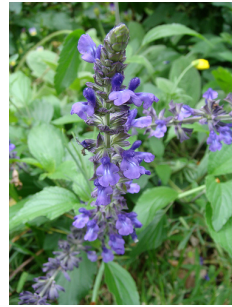

*random control*

**aspect**

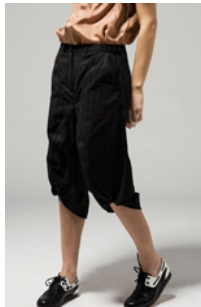

*predicted*

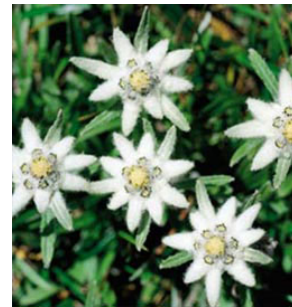

*random control*

**experience**

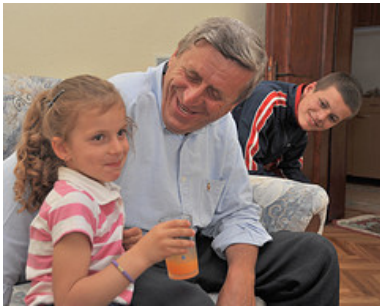

*predicted*

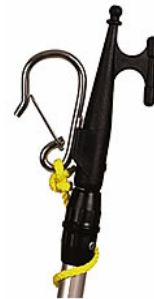

*random control*

jealousy

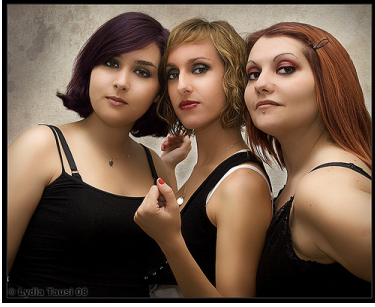

*predicted*

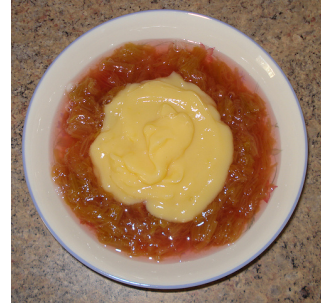

*random control*

funk

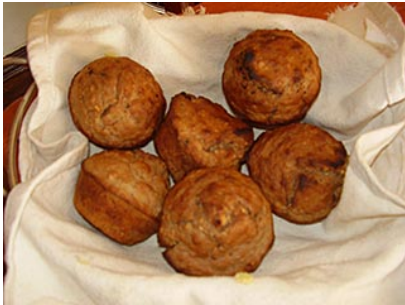

*predicted*

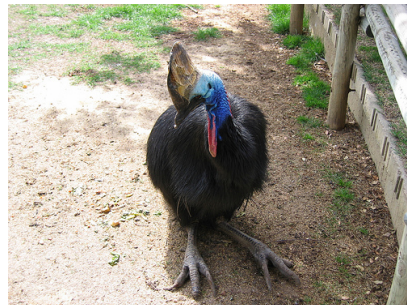

*random control*

meaning

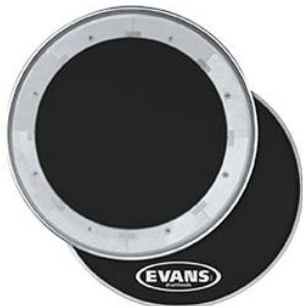

*predicted*

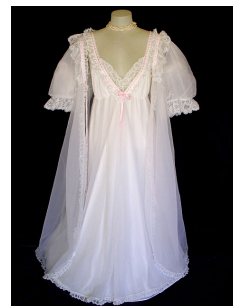

*random control*

luck

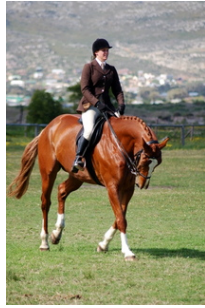

*predicted*

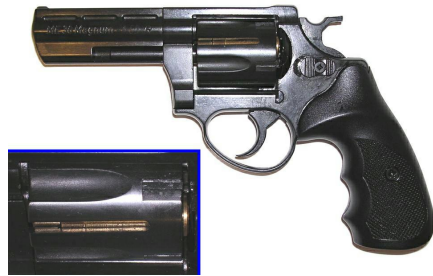

*random control*

contrary

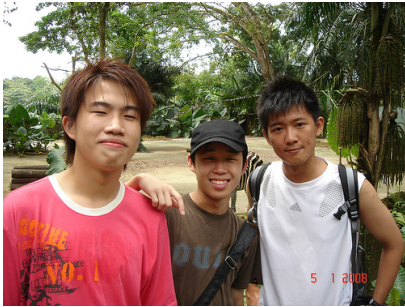

*predicted*

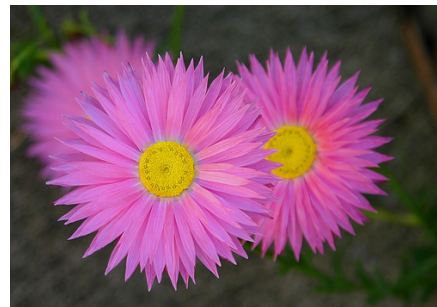

*random control*

sadness

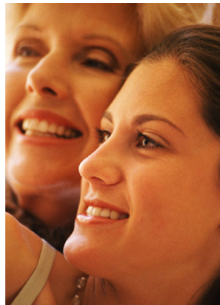

*predicted*

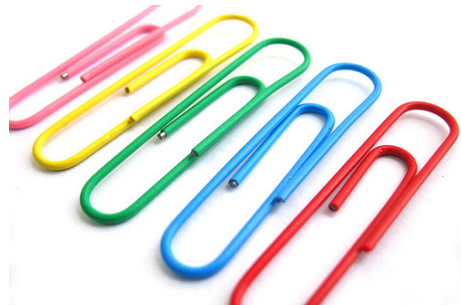

*random control*

conscience

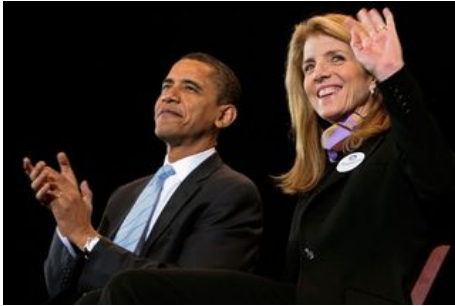

*predicted*

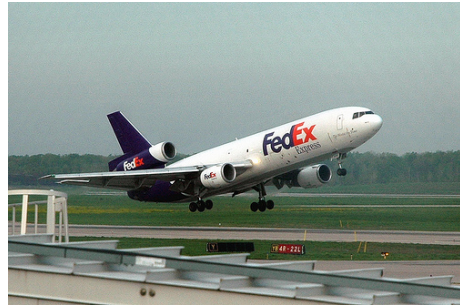

*random control*

inconvenience

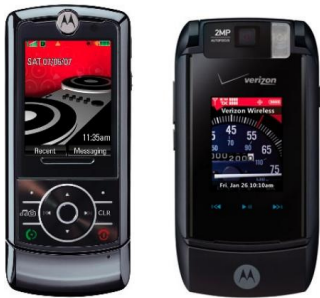

*predicted*

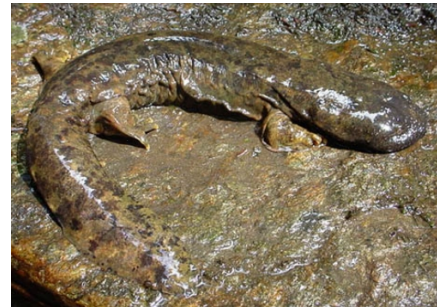

*random control*

boredom

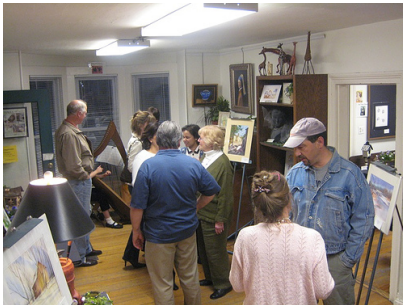

*predicted*

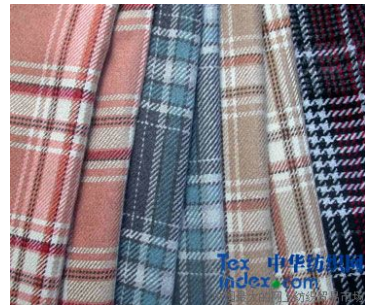

*random control*

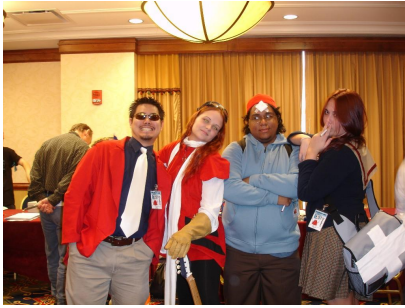

*predicted*

**debut**

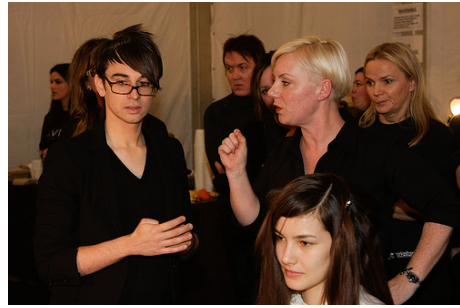

*random control*

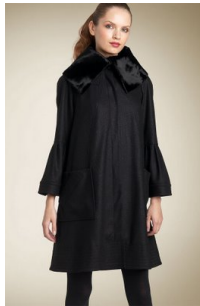

*predicted*

**worth**

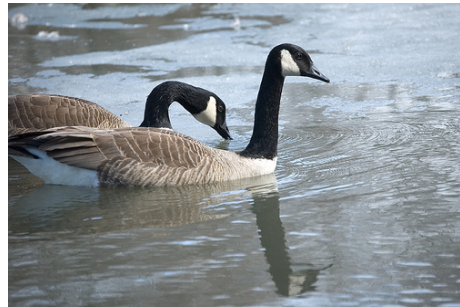

*random control*

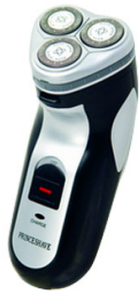

*predicted*

**principle**

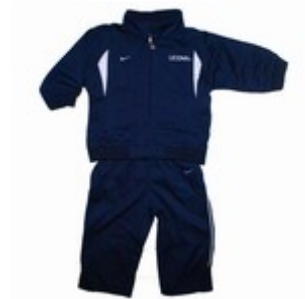

*random control*
