# Supplementary material for: Images of the unseen: extrapolating visual representations for abstract and concrete words in a data-driven computational model
Source: Springer Nature journal article supplement (doi:10.1007/s00426-020-01429-7), 2020-11-12
Supplement: MOESM2 [file 18583028]

## Experiment 2 (exemplar model)

freighter

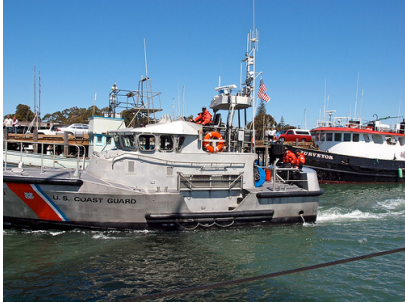

*predicted*

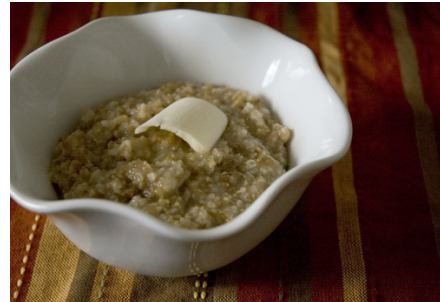

*random control*

pocket

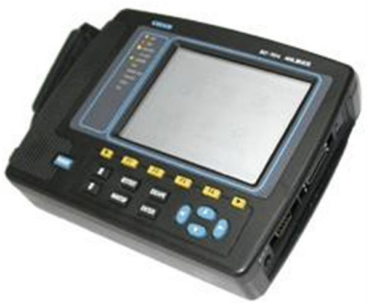

*predicted*

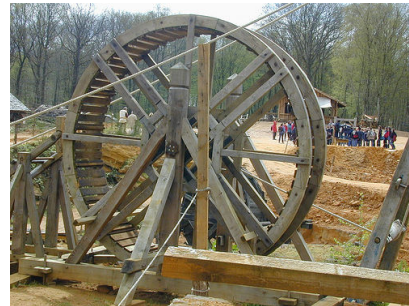

*random control*

uncle

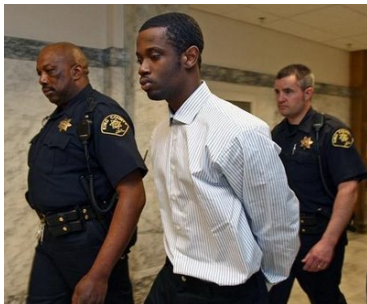

*predicted*

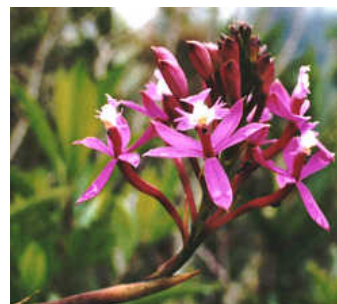

*random control*

performer

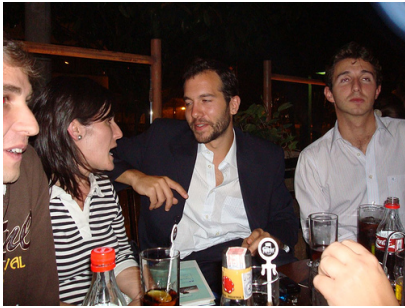

*predicted*

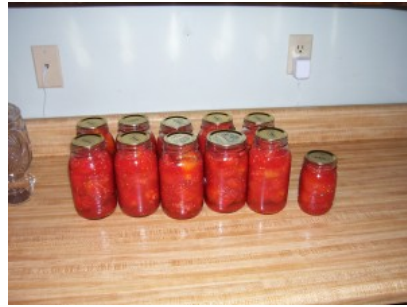

*random control*

whiskey

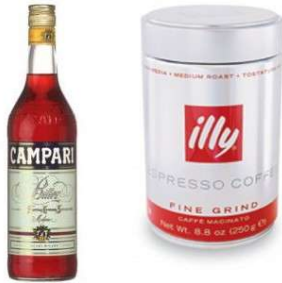

*predicted*

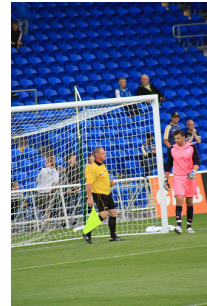

*random control*

hamburger

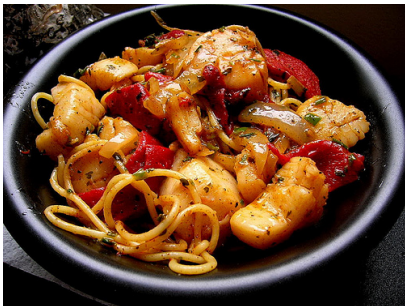

*predicted*

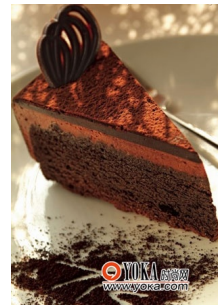

*random control*

barb

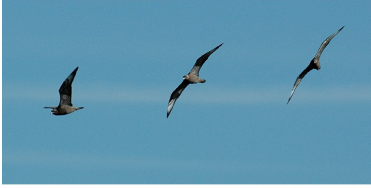

*predicted*

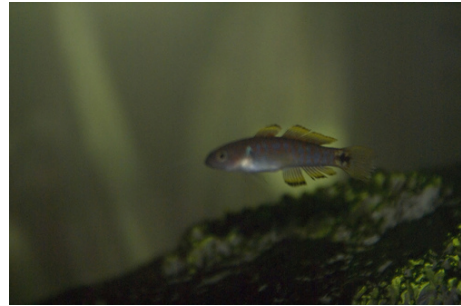

*random control*

cushion

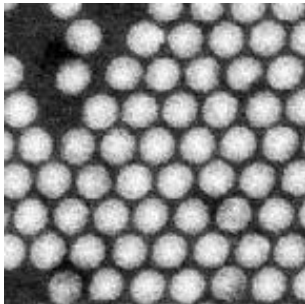

*predicted*

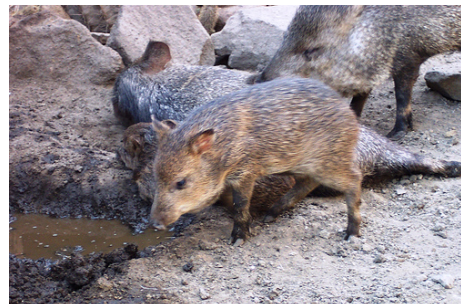

*random control*

spear

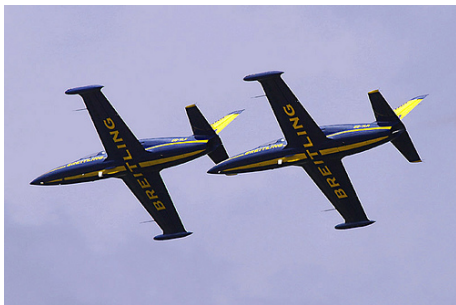

*predicted*

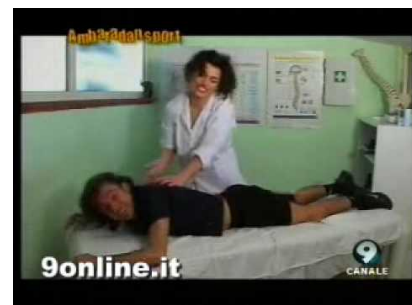

*random control*

engineer

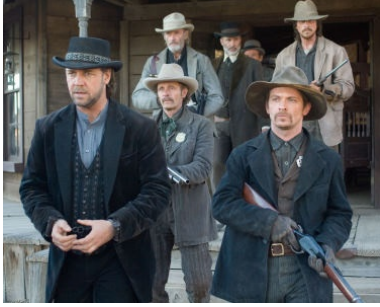

*predicted*

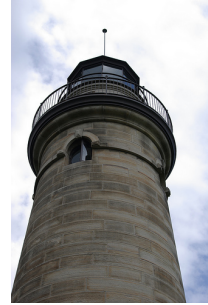

*random control*

cheesecake

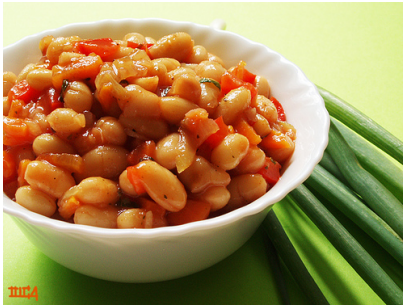

*predicted*

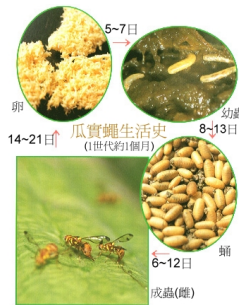

*random control*

ribbon

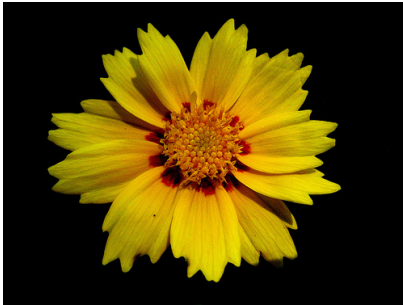

*predicted*

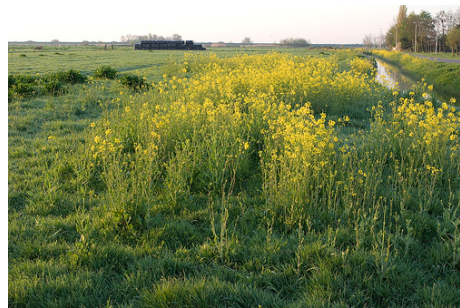

*random control*

cockroach

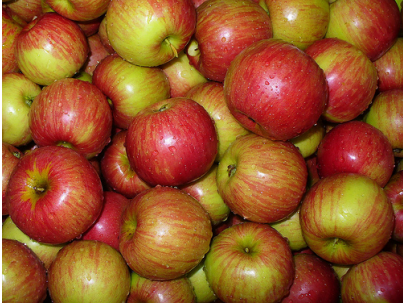

*predicted*

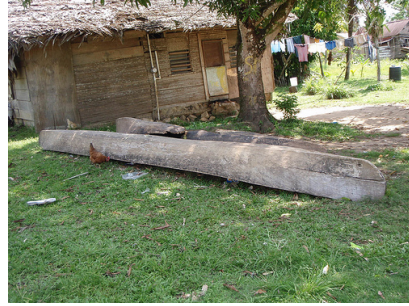

*random control*

stallion

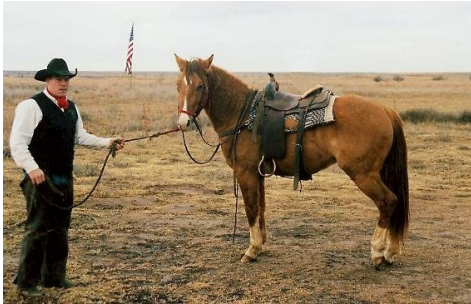

*predicted*

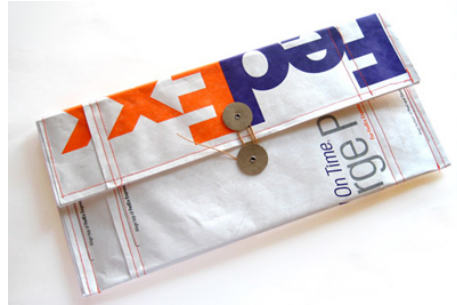

*random control*

crank

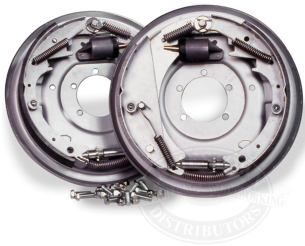

*predicted*

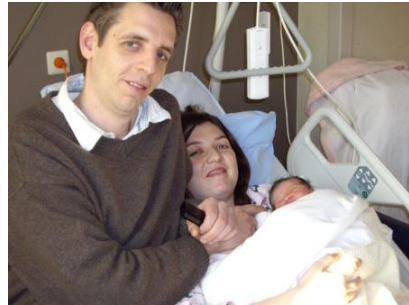

*random control*

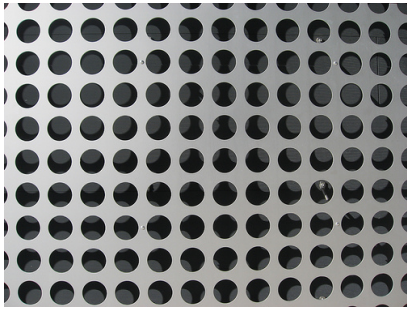

*predicted*

cloth

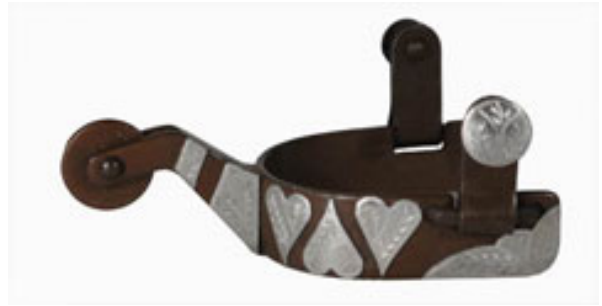

*random control*

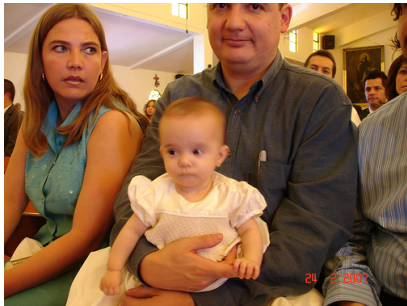

*predicted*

housewife

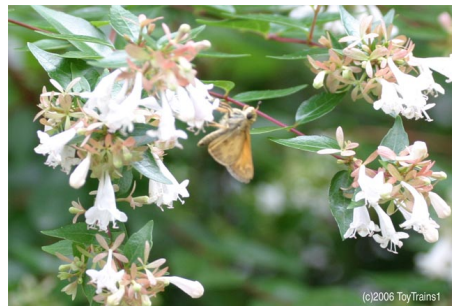

*random control*

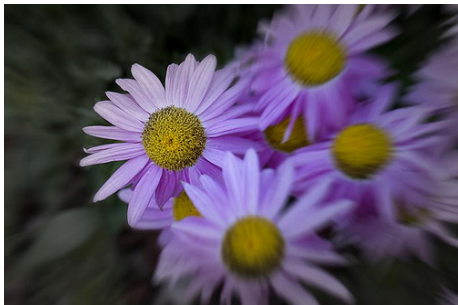

*predicted*

ivy

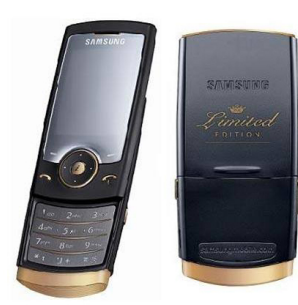

*random control*

tomb

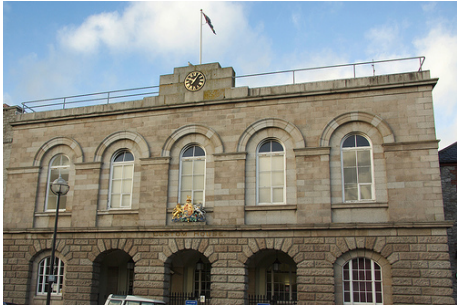

*predicted*

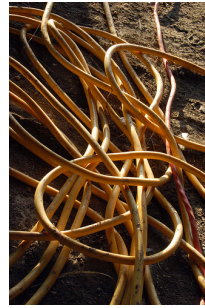

*random control*

leash

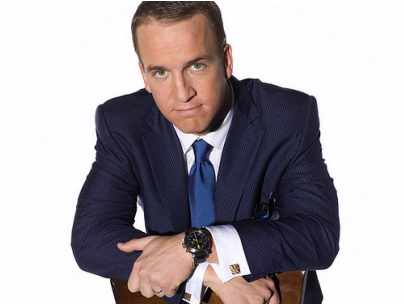

*predicted*

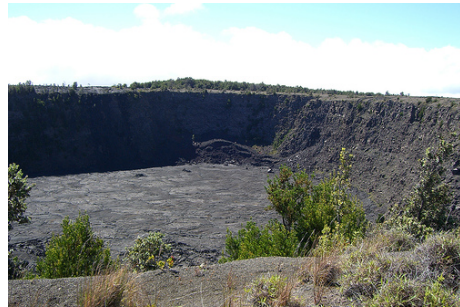

*random control*

cactus

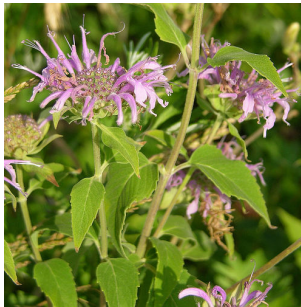

*predicted*

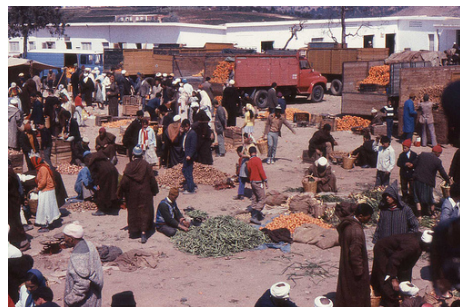

*random control*

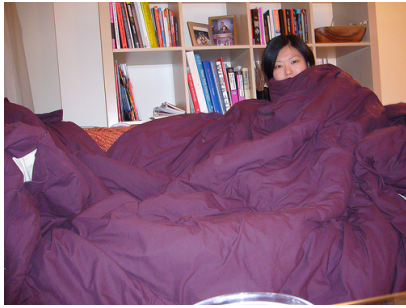

*predicted*

rug

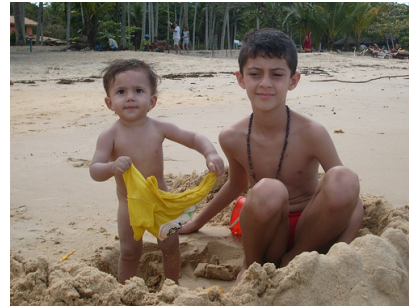

*random control*

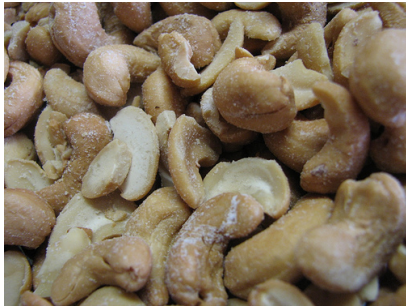

*predicted*

chimp

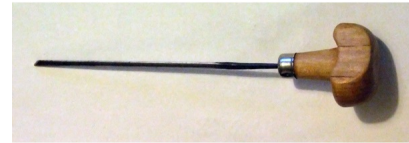

*random control*

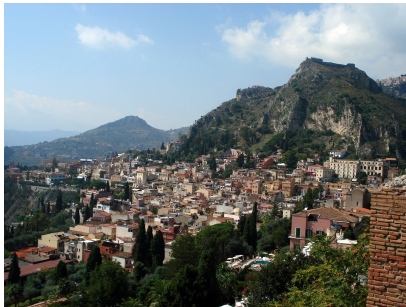

*predicted*

scenery

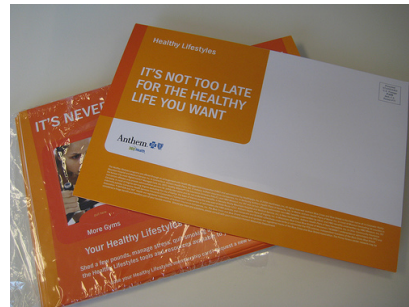

*random control*



writing

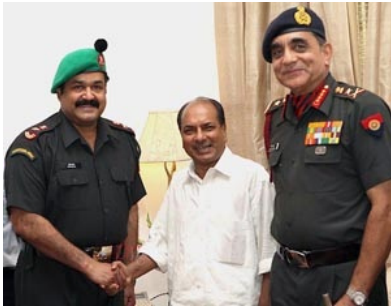

*predicted*

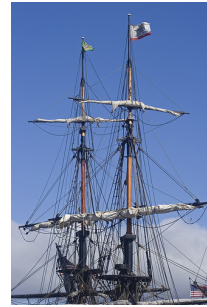

*random control*

address

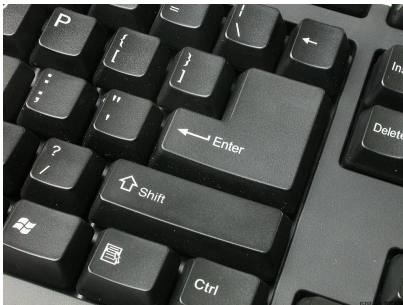

*predicted*

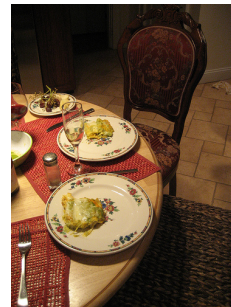

*random control*

killing

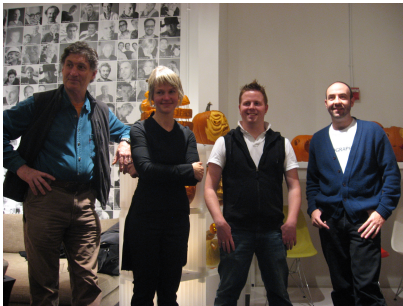

*predicted*

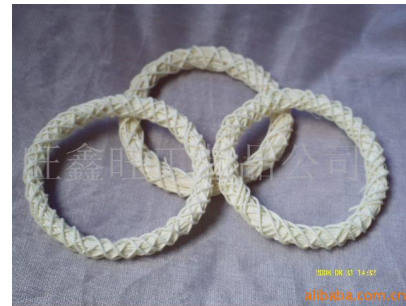

*random control*

**greeting**

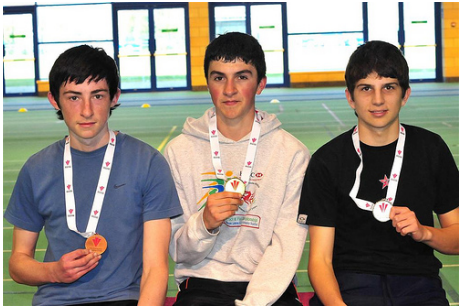

*predicted*

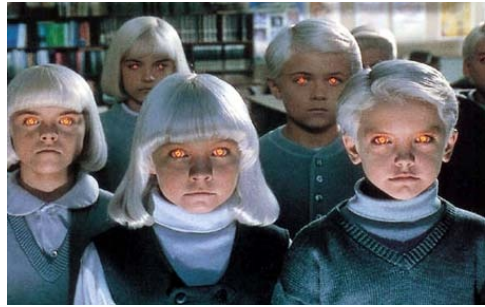

*random control*

**paragraph**

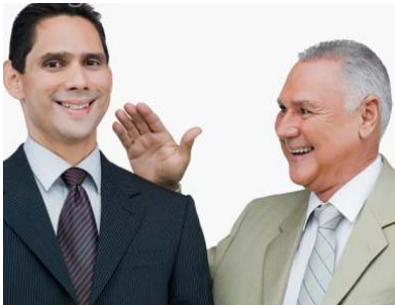

*predicted*

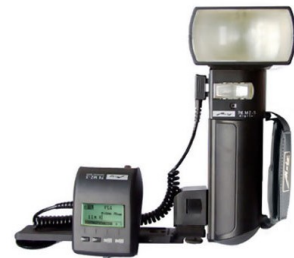

*random control*

**bent**

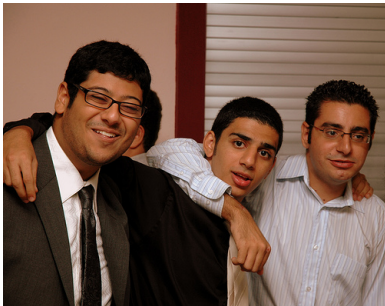

*predicted*

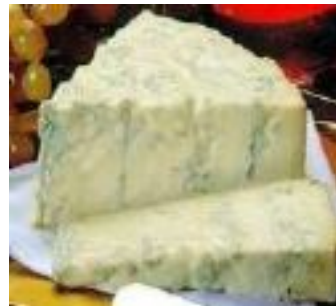

*random control*

dime

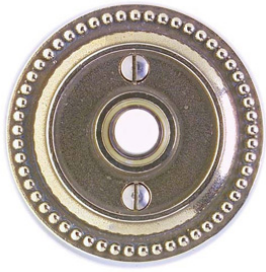

*predicted*

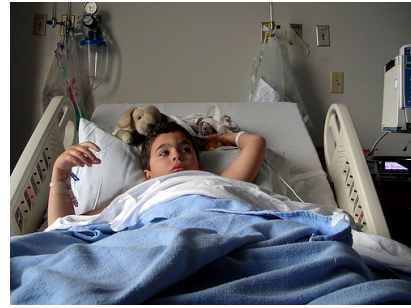

*random control*

filth

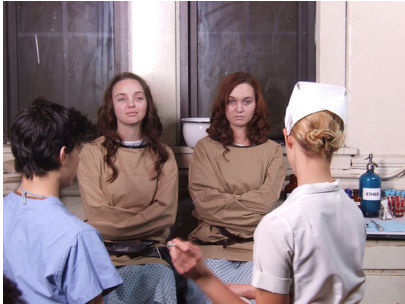

*predicted*

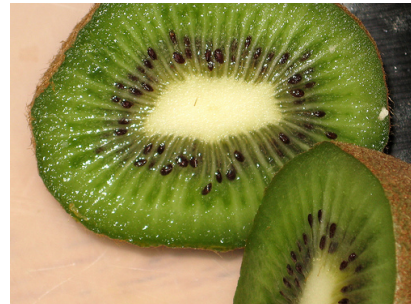

*random control*

mob

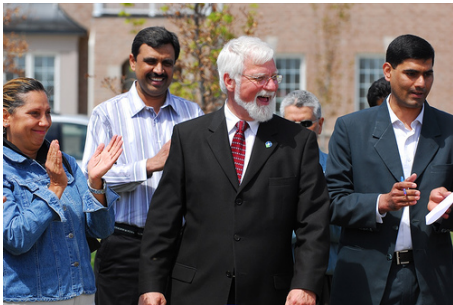

*predicted*

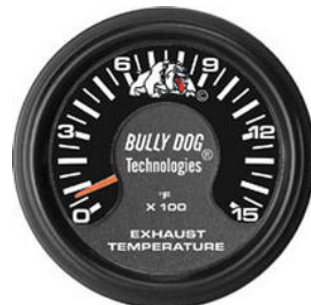

*random control*

sedative

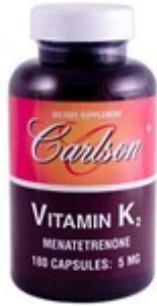

*predicted*

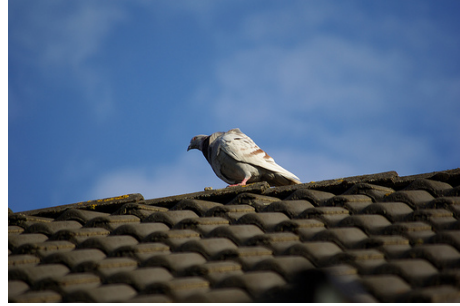

*random control*

plague

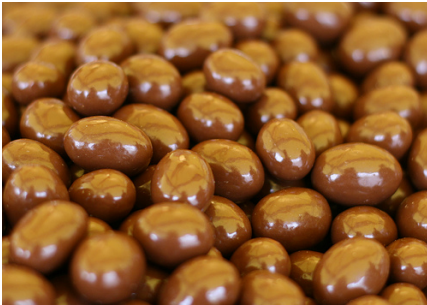

*predicted*

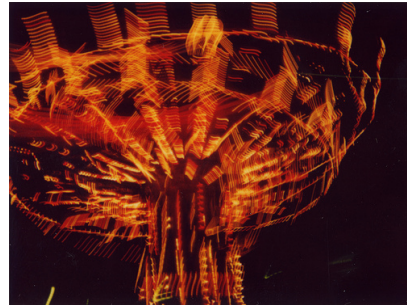

*random control*

petition

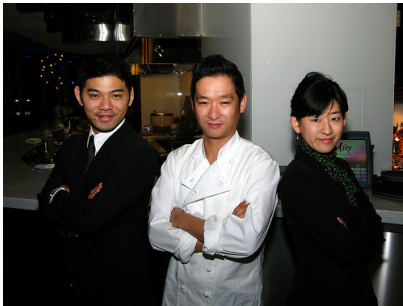

*predicted*

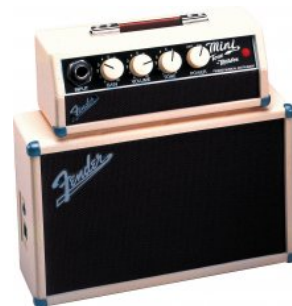

*random control*

asthma

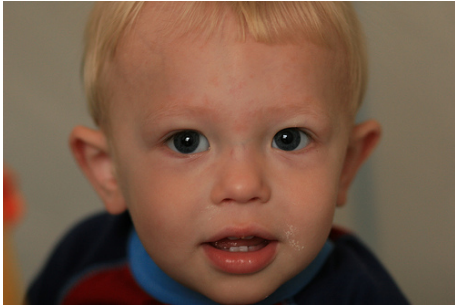

*predicted*

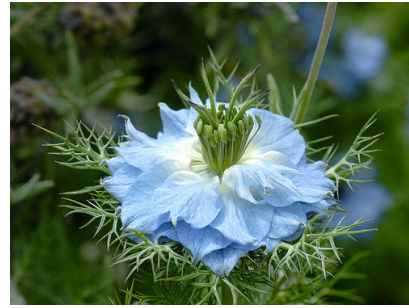

*random control*

scrap

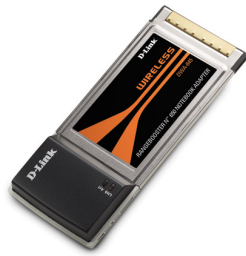

*predicted*

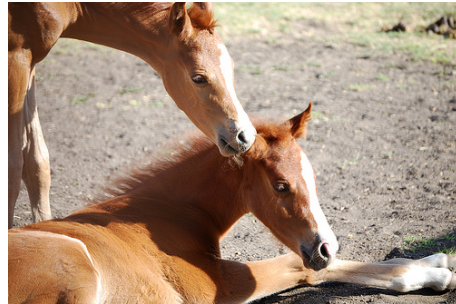

*random control*

gram

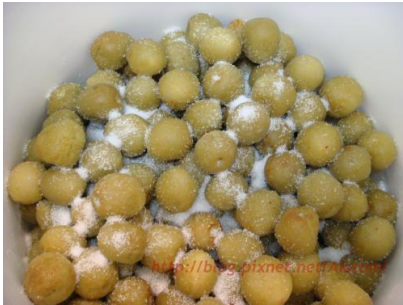

*predicted*

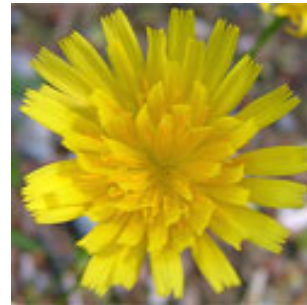

*random control*

**biology**

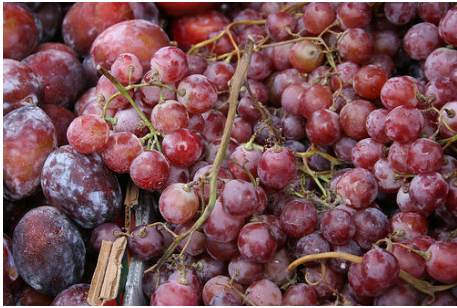

*predicted*

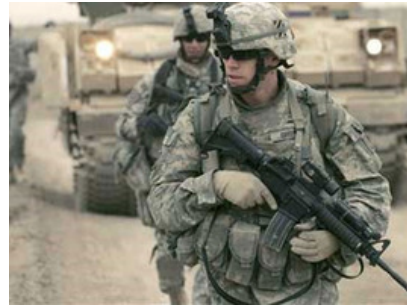

*random control*

**operation**

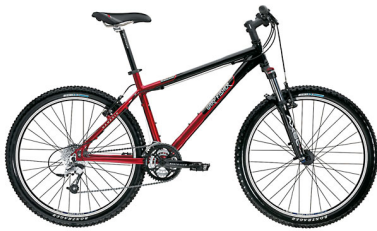

*predicted*

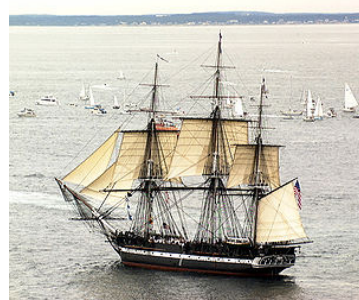

*random control*

**bruise**

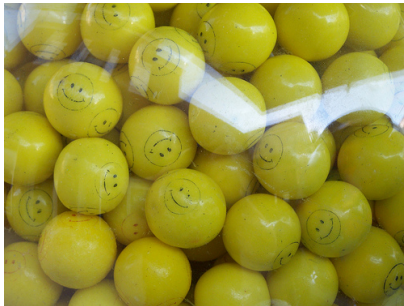

*predicted*

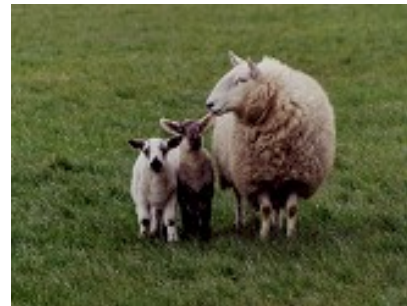

*random control*

symphony

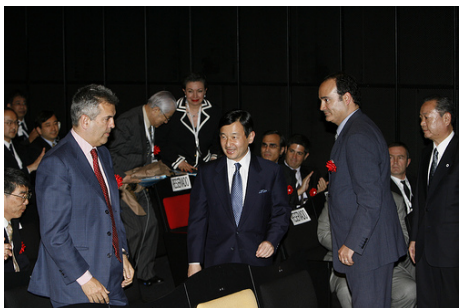

*predicted*

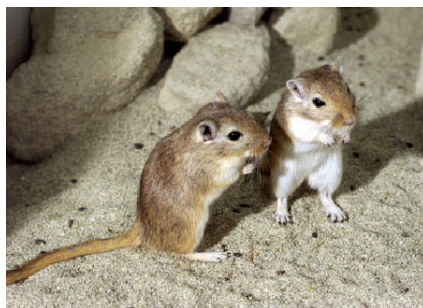

*random control*

aspirin

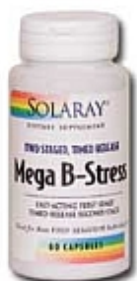

*predicted*

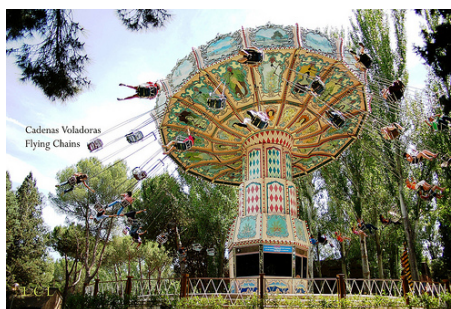

*random control*

strike

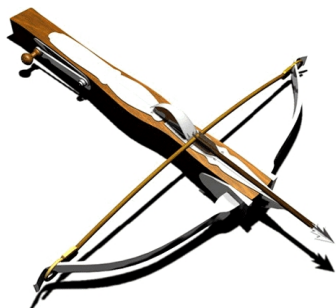

*predicted*

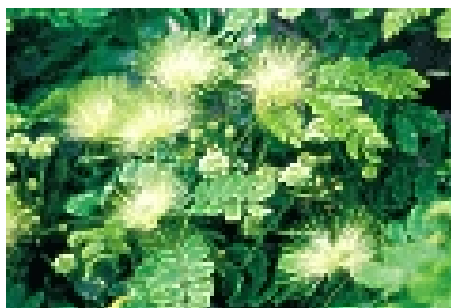

*random control*

bible

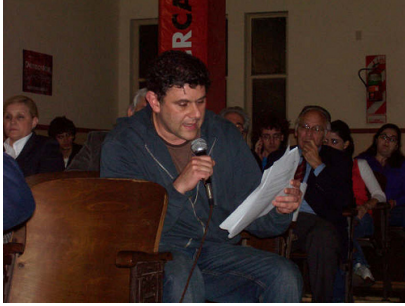

*predicted*

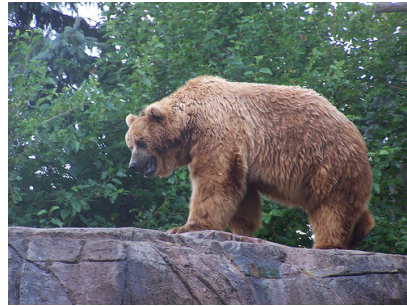

*random control*

land

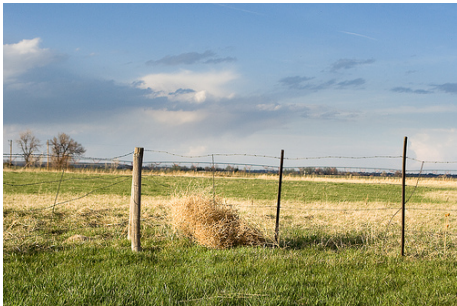

*predicted*

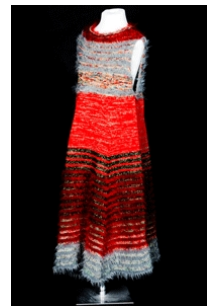

*random control*

poison

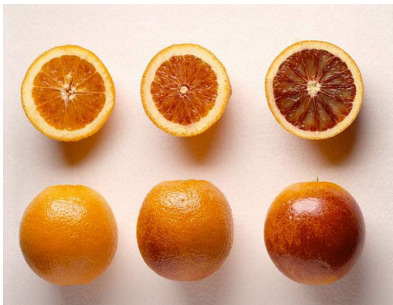

*predicted*

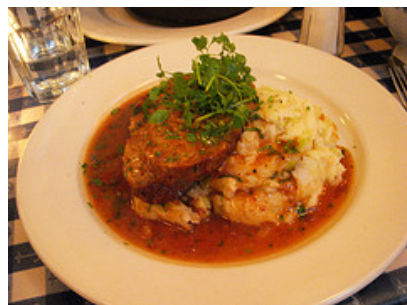

*random control*



flame

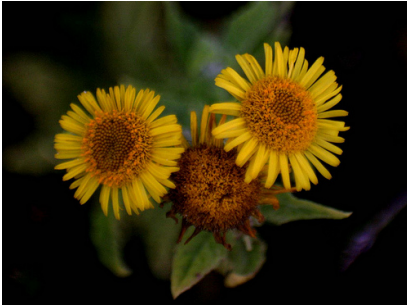

*predicted*

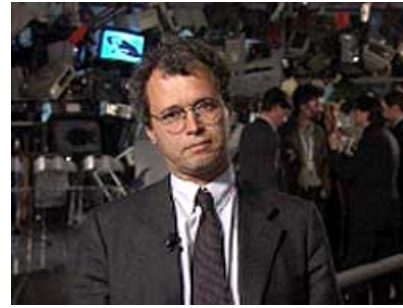

*random control*

playboy

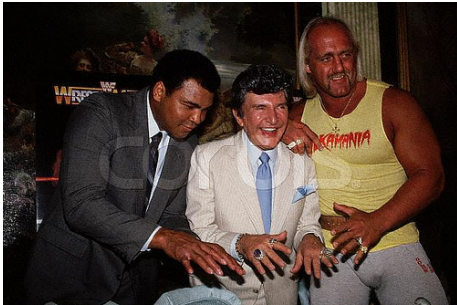

*predicted*

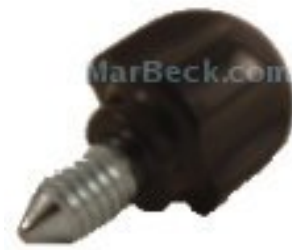

*random control*

traps

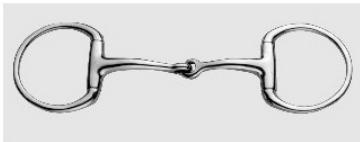

*predicted*

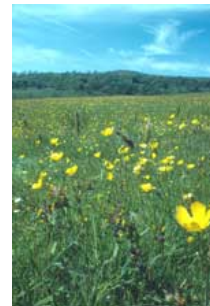

*random control*

scout

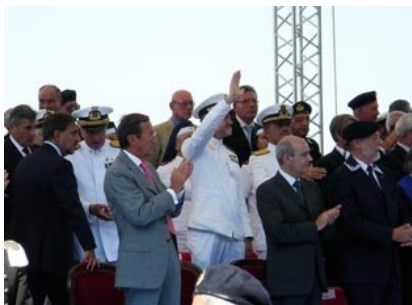

*predicted*

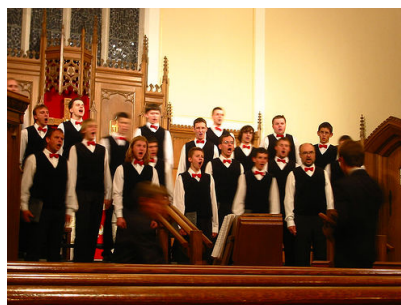

*random control*

cardboard

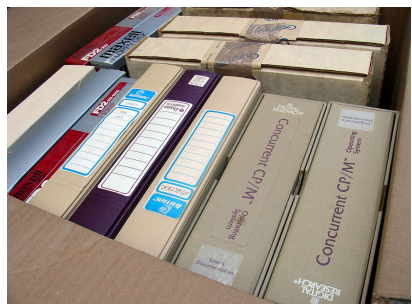

*predicted*

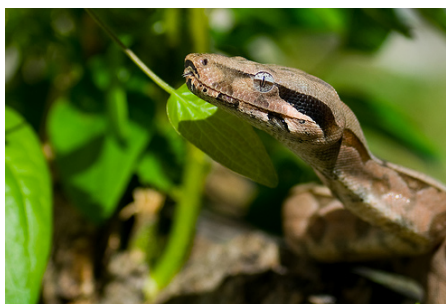

*random control*

archives

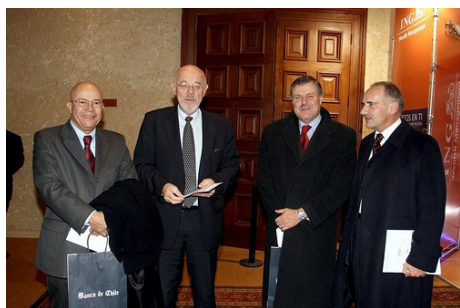

*predicted*

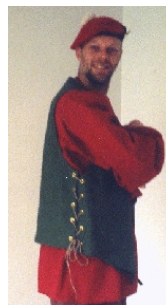

*random control*

cutting

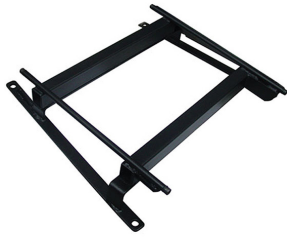

*predicted*

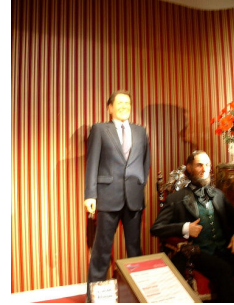

*random control*

snack

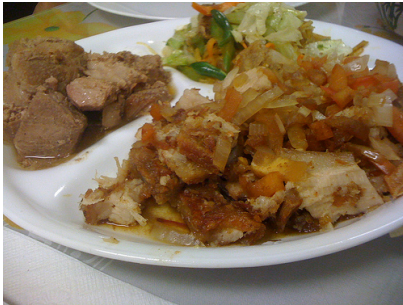

*predicted*

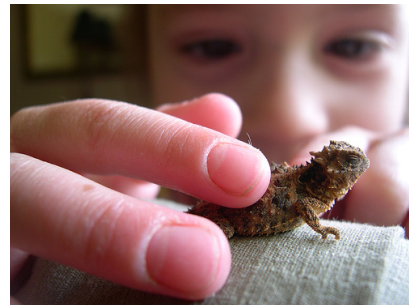

*random control*

piglet

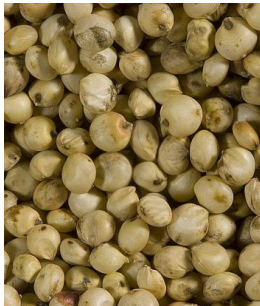

*predicted*

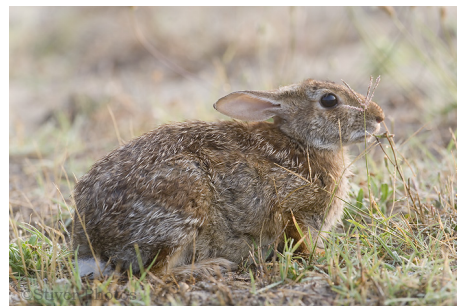

*random control*

**warden**

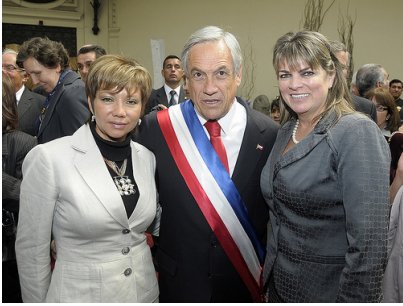

*predicted*

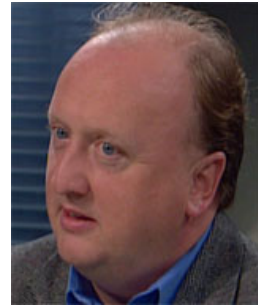

*random control*

**chop**

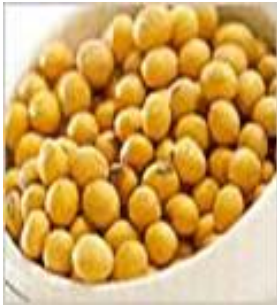

*predicted*

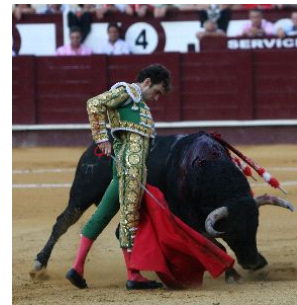

*random control*

**critic**

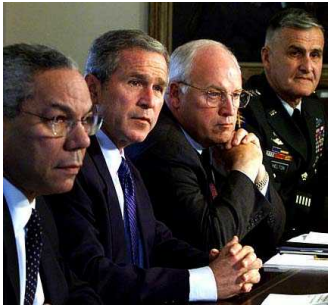

*predicted*

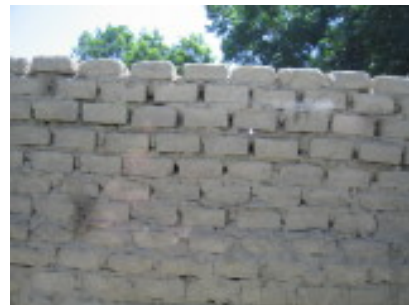

*random control*

muffin

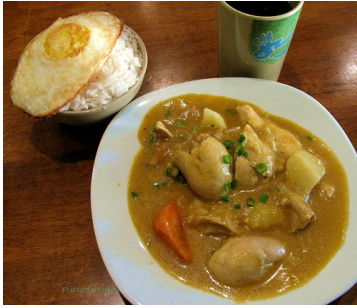

*predicted*

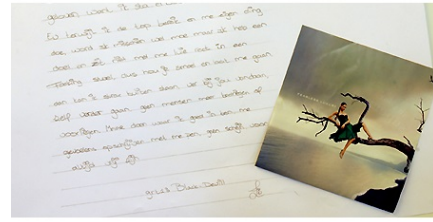

*random control*

assistant

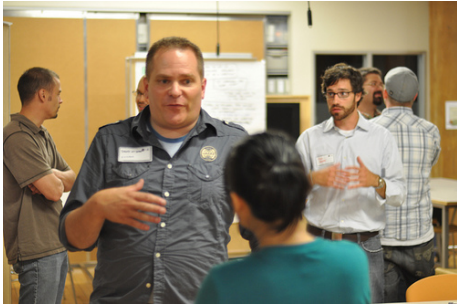

*predicted*

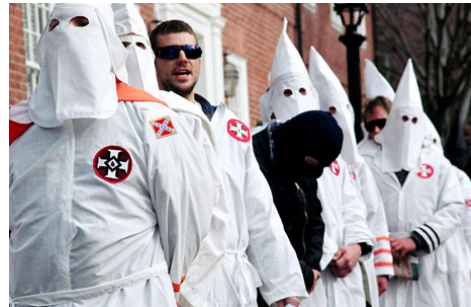

*random control*

paramedic

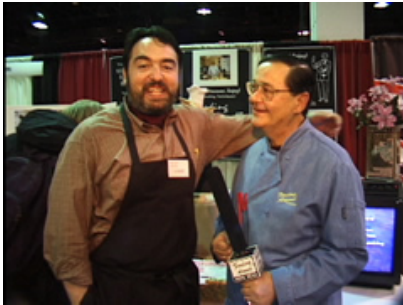

*predicted*

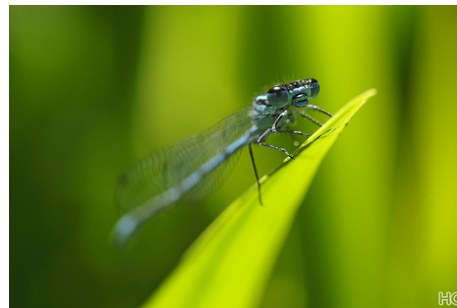

*random control*

auntie

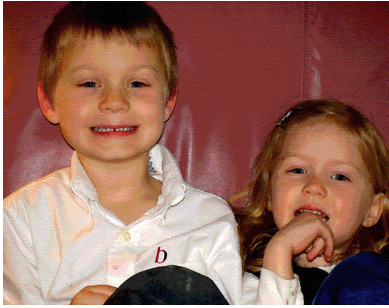

*predicted*

nuxiemade

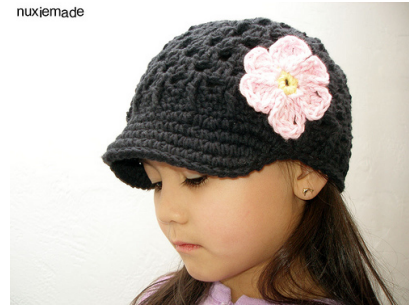

*random control*

preacher

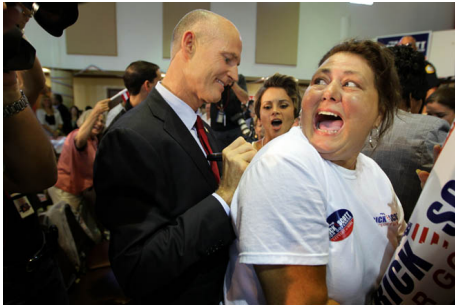

*predicted*

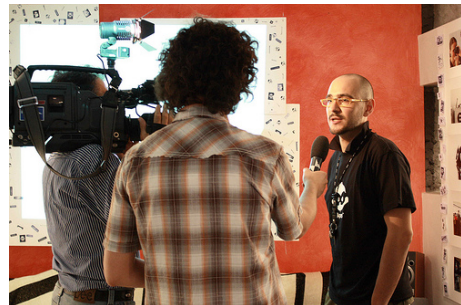

*random control*

skeleton

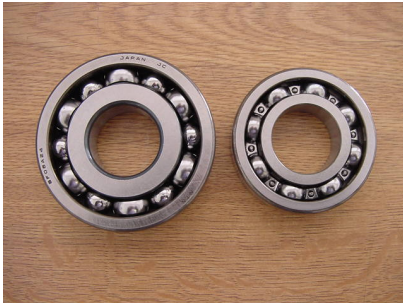

*predicted*

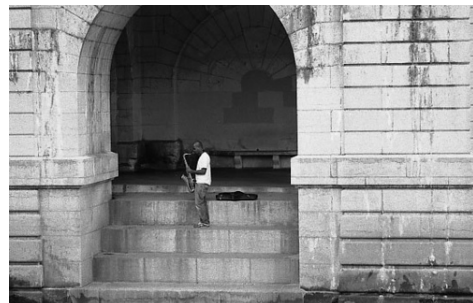

*random control*

**lily**

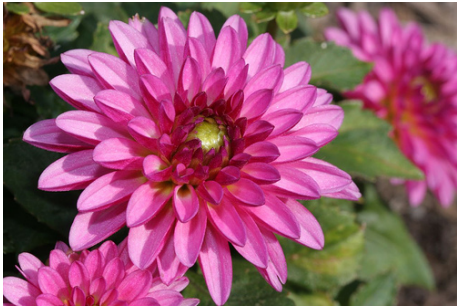

*predicted*

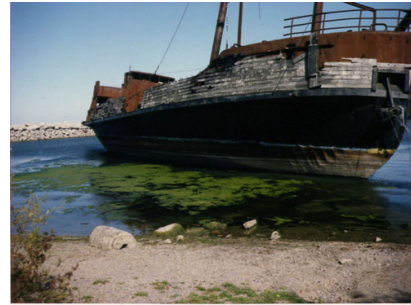

*random control*

**leather**

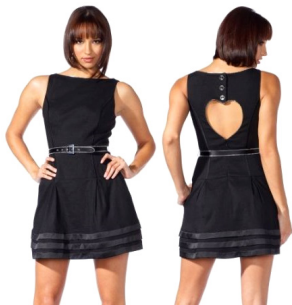

*predicted*

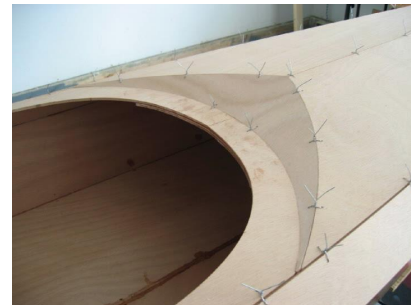

*random control*

**ally**

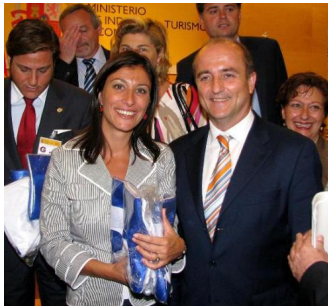

*predicted*

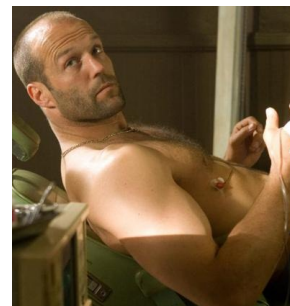

*random control*

**bout**

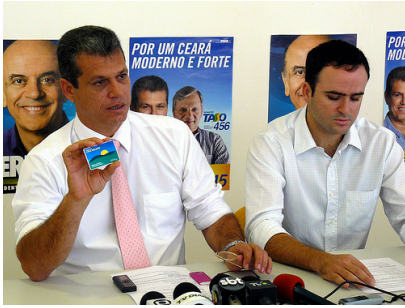

*predicted*

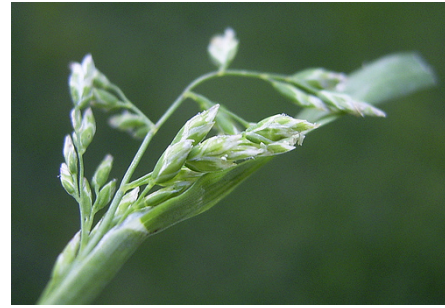

*random control*

**breed**

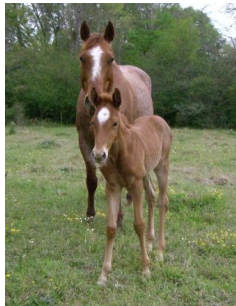

*predicted*

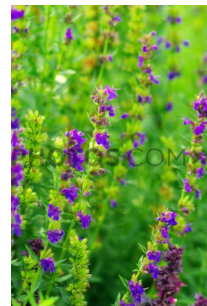

*random control*

**childhood**

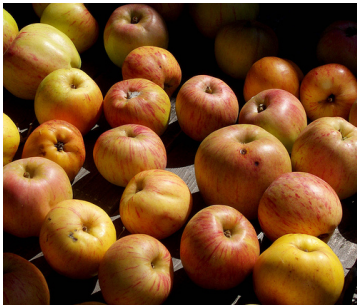

*predicted*

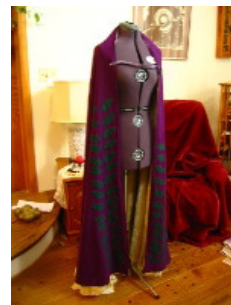

*random control*



corporal

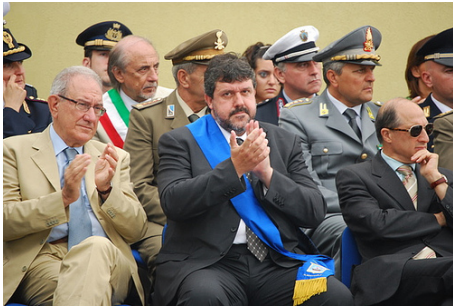

*predicted*

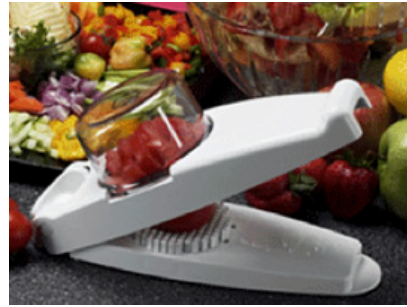

*random control*

defensive

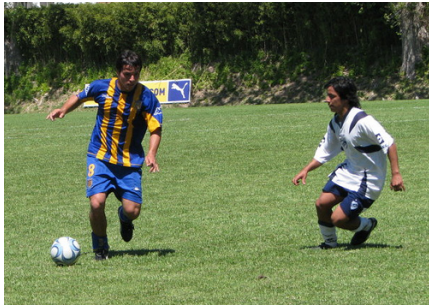

*predicted*

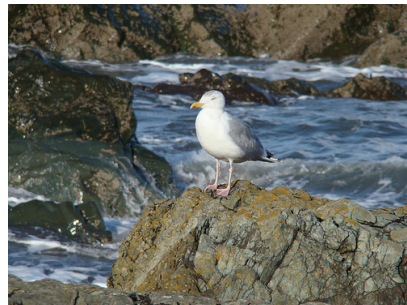

*random control*

department

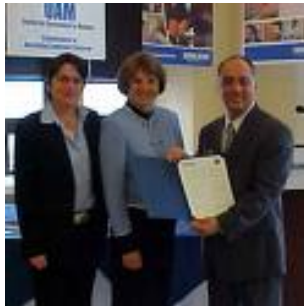

*predicted*

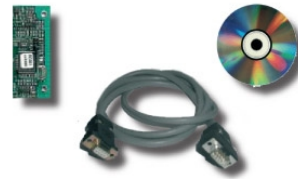

*random control*

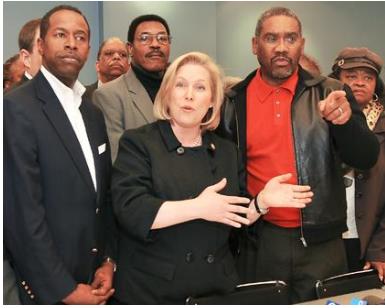

*predicted*

fit

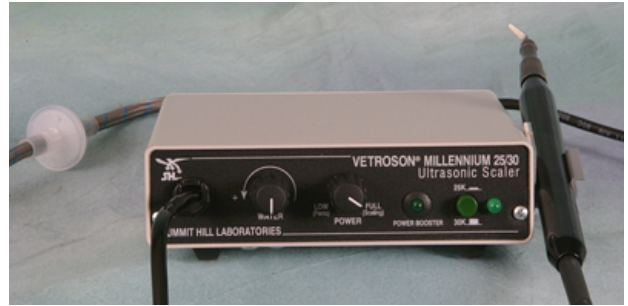

*random control*

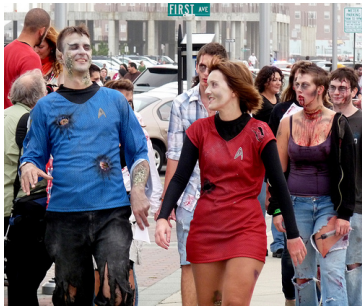

*predicted*

fore

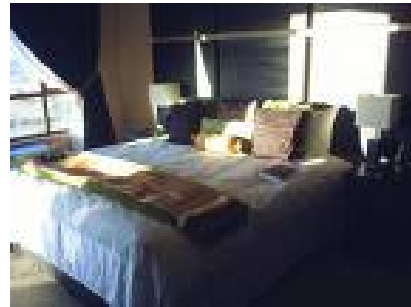

*random control*

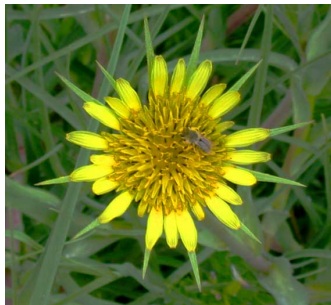

*predicted*

gall

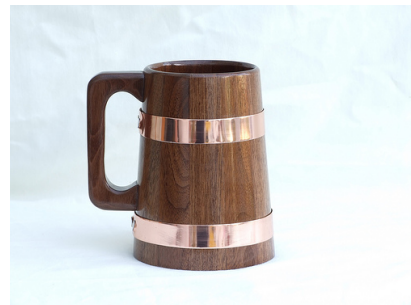

*random control*

graduating

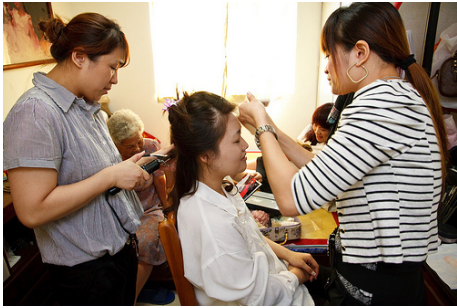

*predicted*

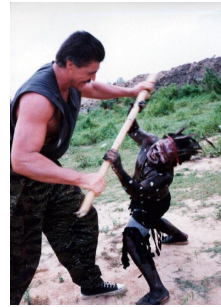

*random control*

journalism

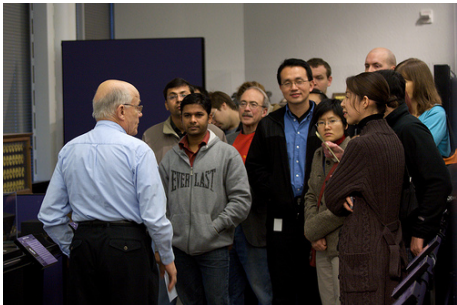

*predicted*

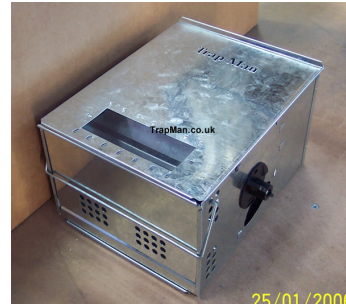

*random control*

main

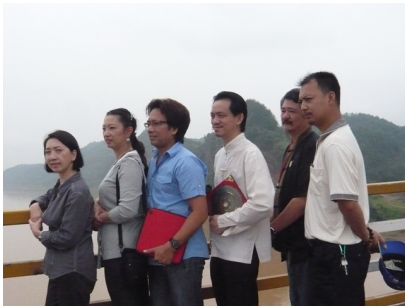

*predicted*

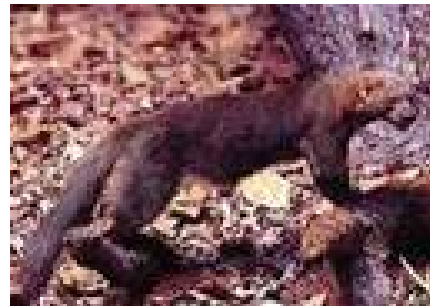

*random control*

member

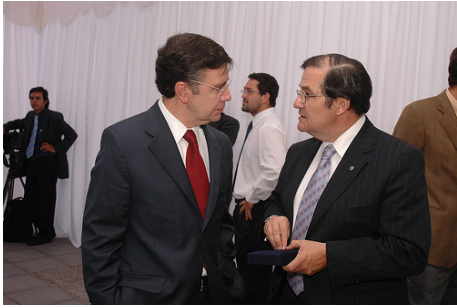

*predicted*

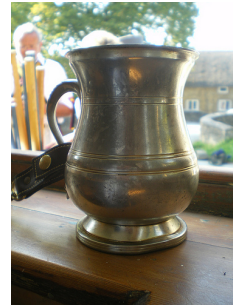

*random control*

outsider

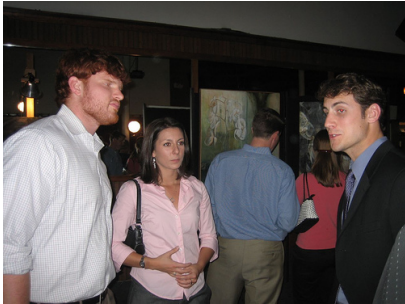

*predicted*

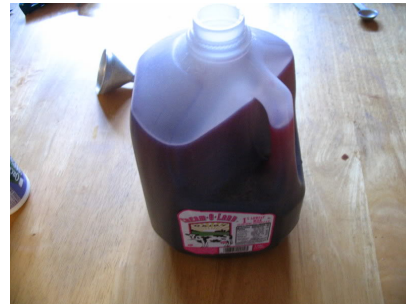

*random control*

position

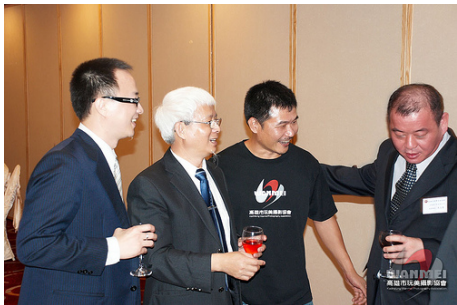

*predicted*

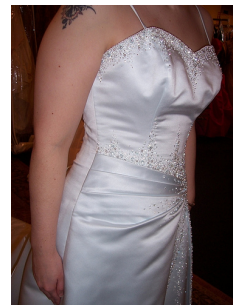

*random control*

salvage

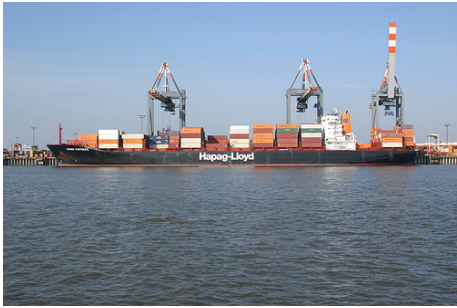

*predicted*

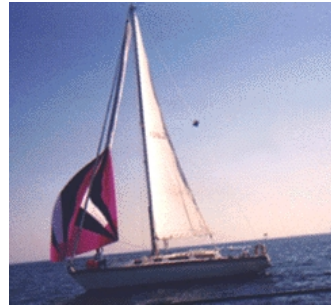

*random control*

scoundrel

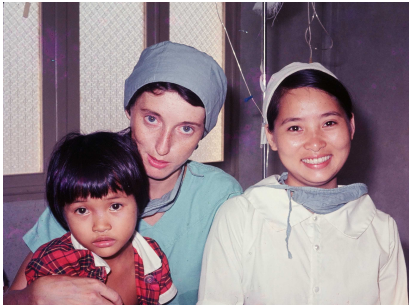

*predicted*

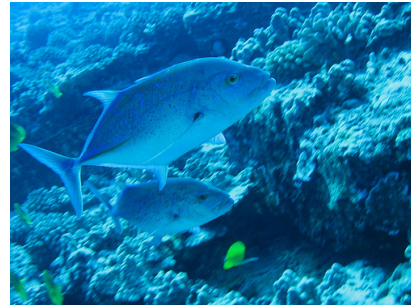

*random control*

sight

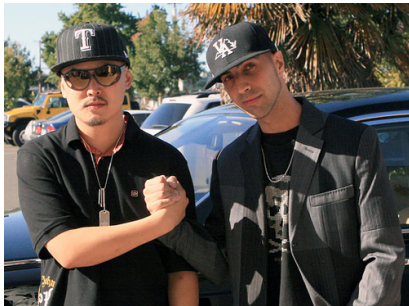

*predicted*

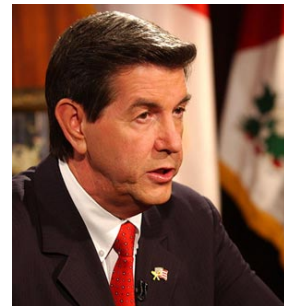

*random control*

starboard

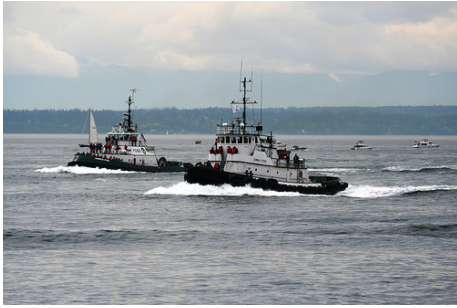

*predicted*

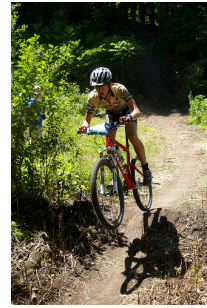

*random control*

vice

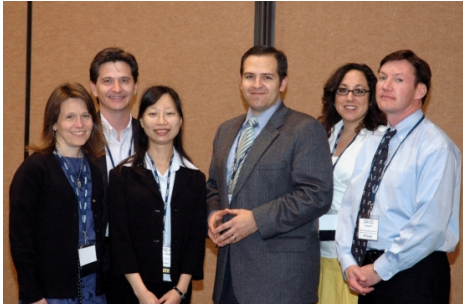

*predicted*

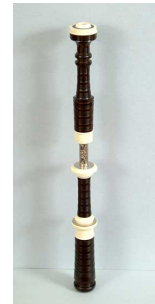

*random control*

vogue

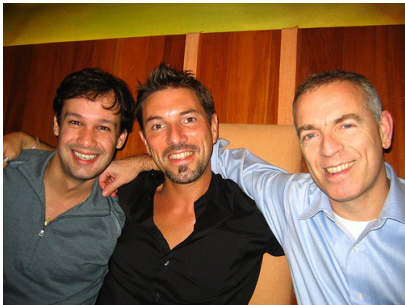

*predicted*

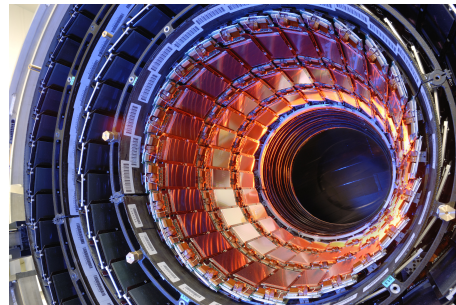

*random control*

wild

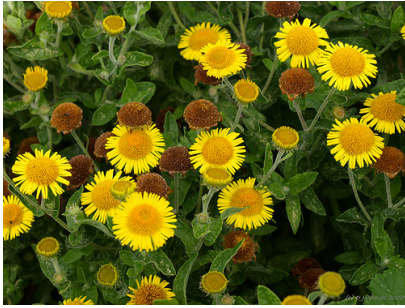

*predicted*

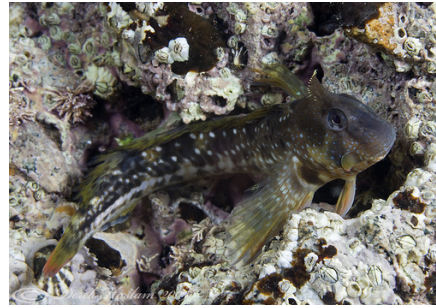

*random control*

virtue

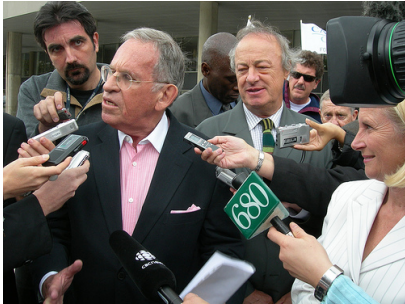

*predicted*

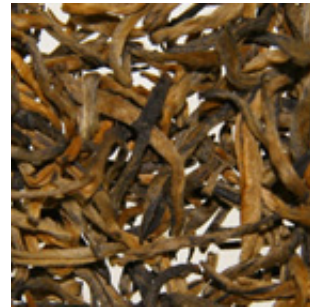

*random control*

perfection

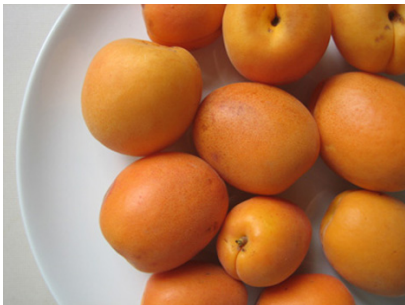

*predicted*

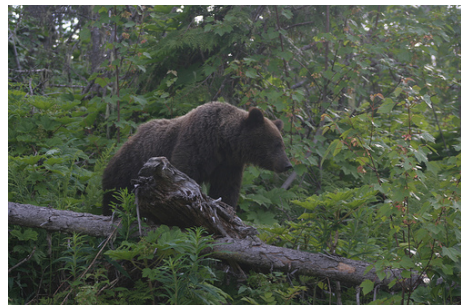

*random control*

awareness

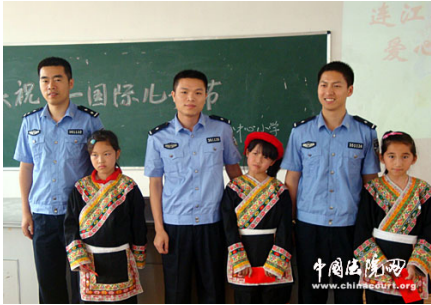

*predicted*

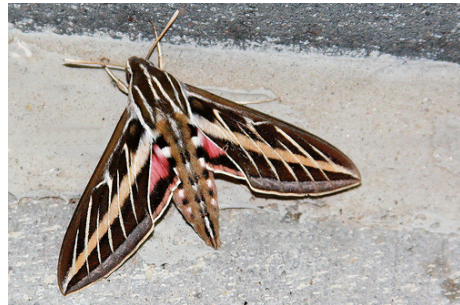

*random control*

madness

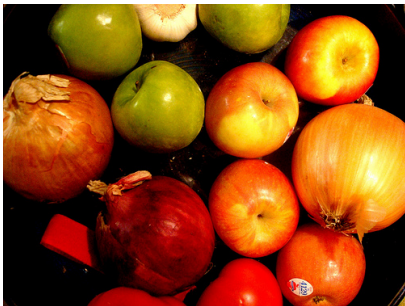

*predicted*

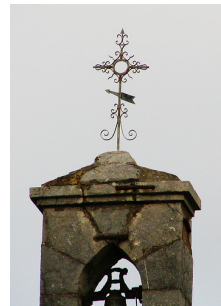

*random control*

determination

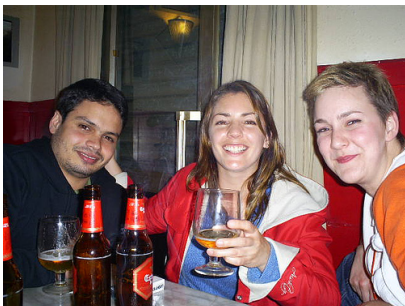

*predicted*

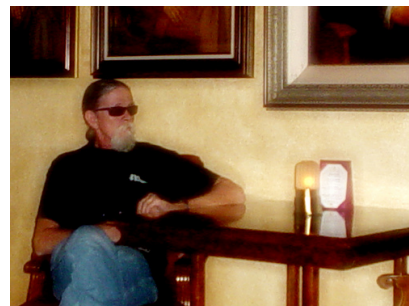

*random control*



metaphor

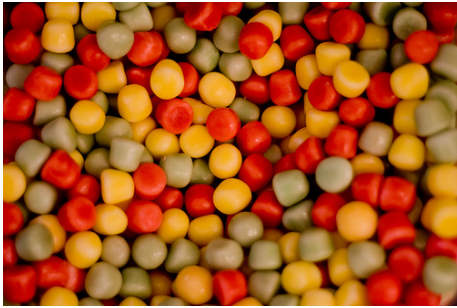

*predicted*

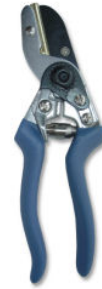

*random control*

curiosity

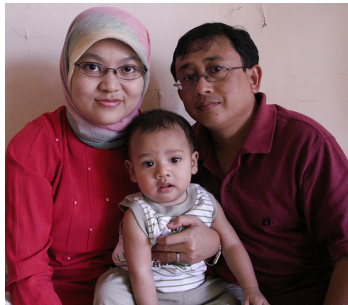

*predicted*

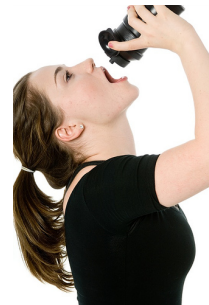

*random control*

destiny

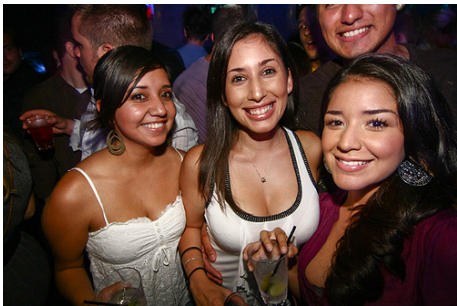

*predicted*

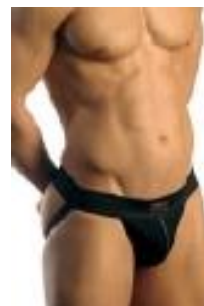

*random control*

opportunity

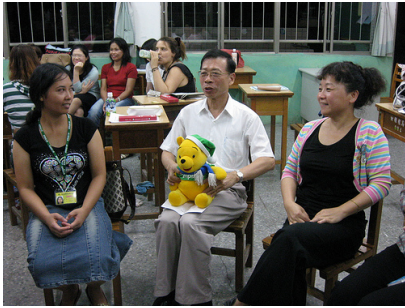

*predicted*

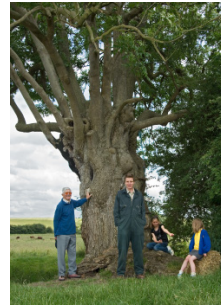

*random control*

aspect

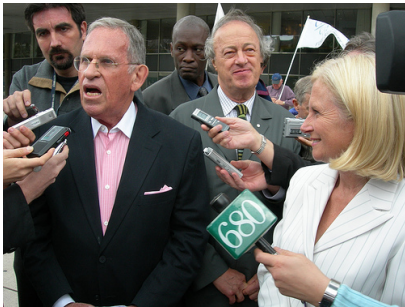

*predicted*

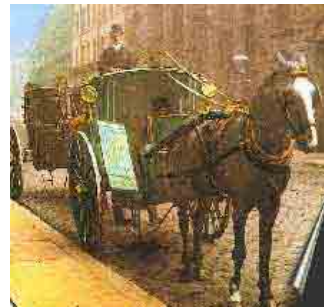

*random control*

experience

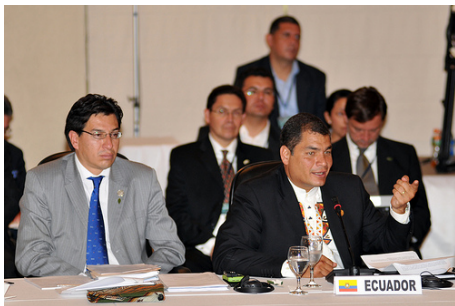

*predicted*

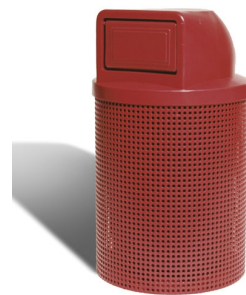

*random control*

jealousy

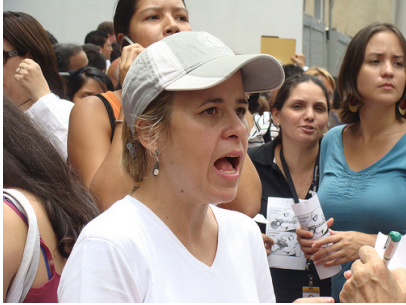

*predicted*

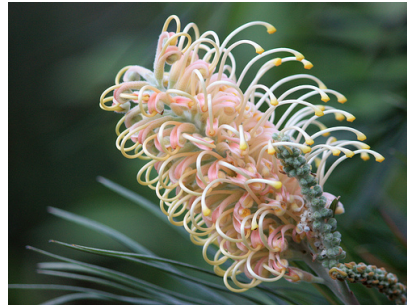

*random control*

funk

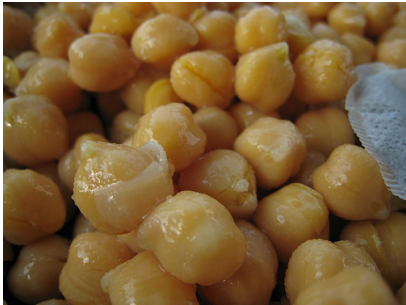

*predicted*

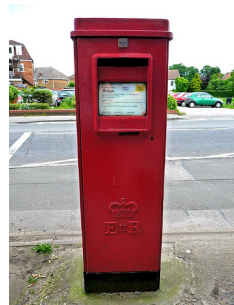

*random control*

meaning

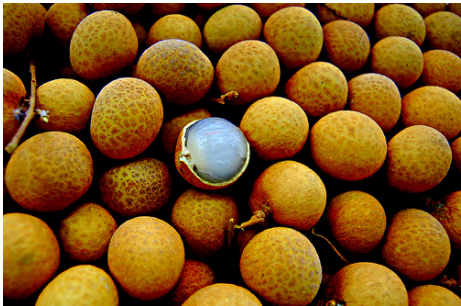

*predicted*

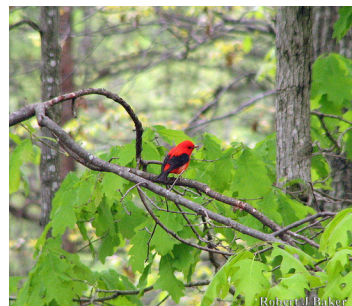

*random control*

luck

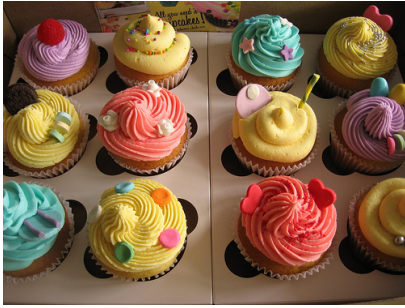

*predicted*

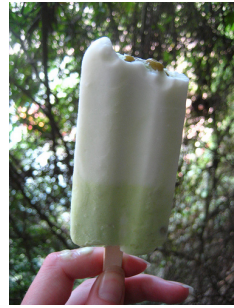

*random control*

contrary

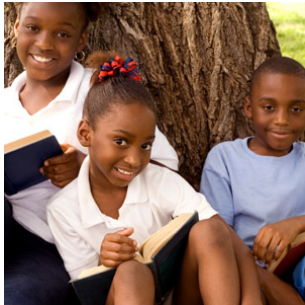

*predicted*

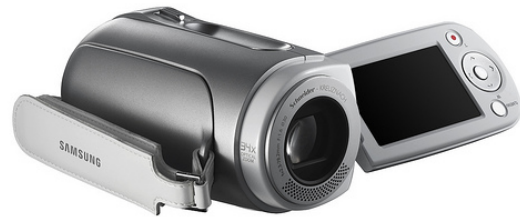

*random control*

sadness

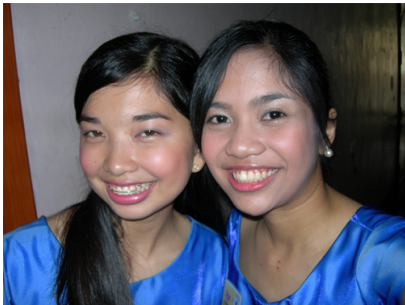

*predicted*

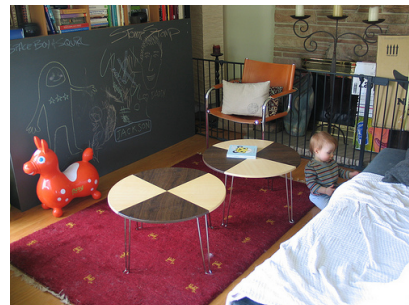

*random control*

conscience

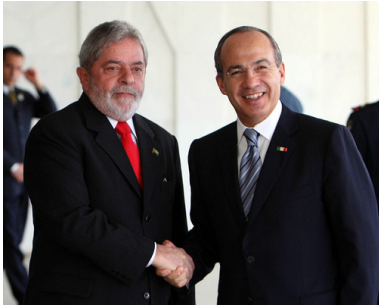

*predicted*

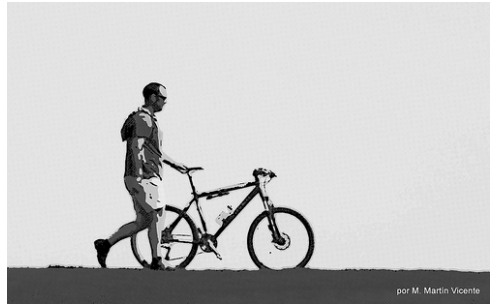

*random control*

inconvenience

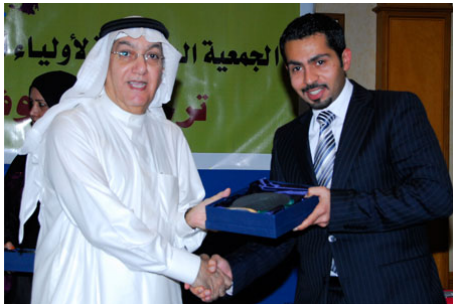

*predicted*

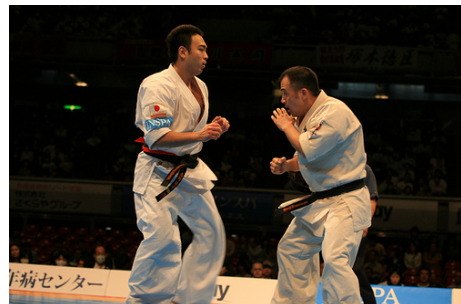

*random control*

boredom

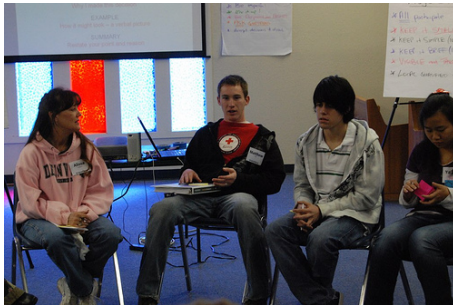

*predicted*

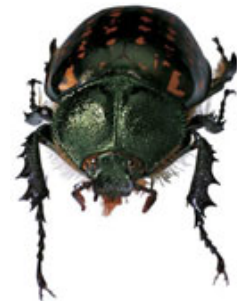

*random control*

**debut**

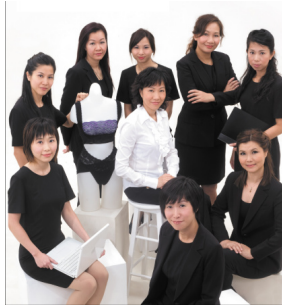

*predicted*

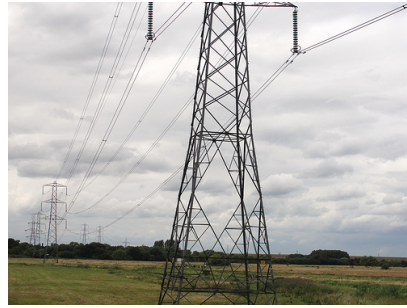

*random control*

**worth**

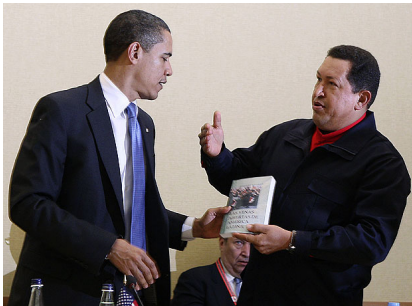

*predicted*

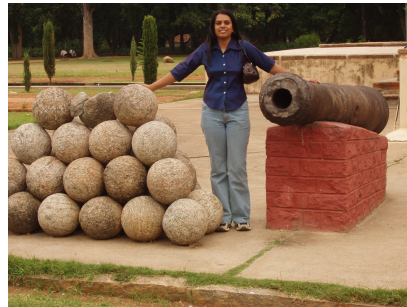

*random control*

**principle**

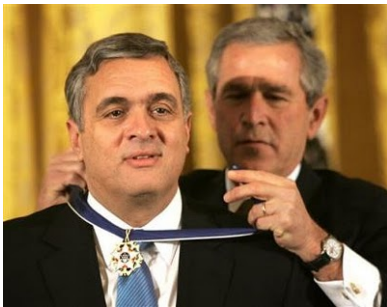

*predicted*

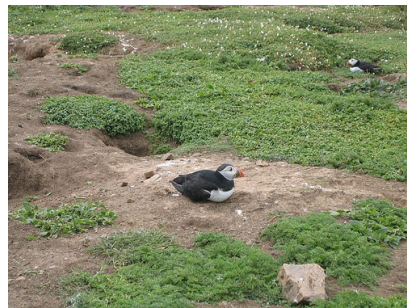

*random control*
