# Supplementary material for: Images of the unseen: extrapolating visual representations for abstract and concrete words in a data-driven computational model
Source: Springer Nature journal article supplement (doi:10.1007/s00426-020-01429-7), 2020-11-12
Supplement: MOESM3 [file 18583028]

# Experiment 3 (prototype model)

nausea

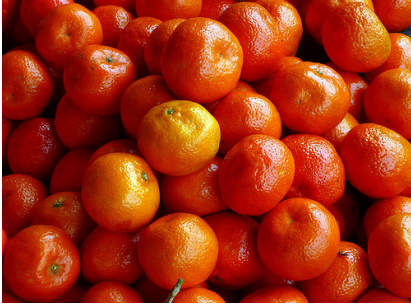

*predicted*

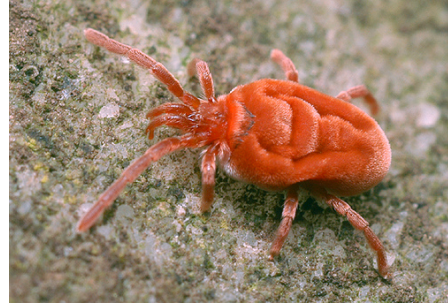

*random control*

appendix

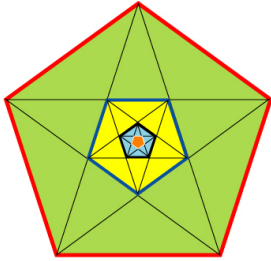

Figure 6

*predicted*

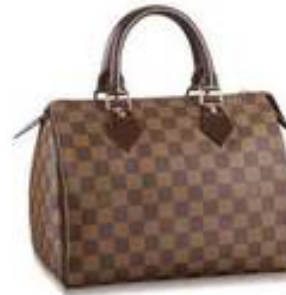

*random control*

moron

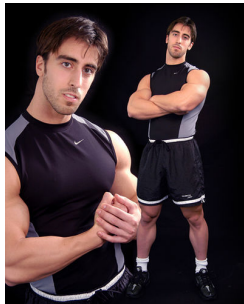

*predicted*

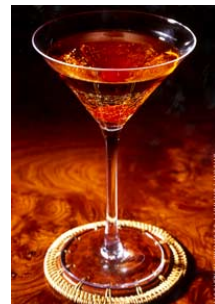

*random control*

question

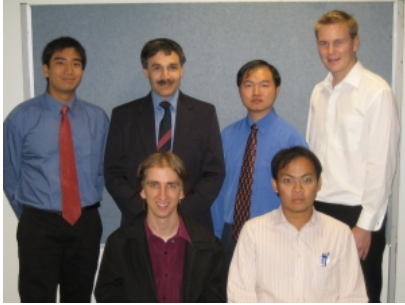

*predicted*

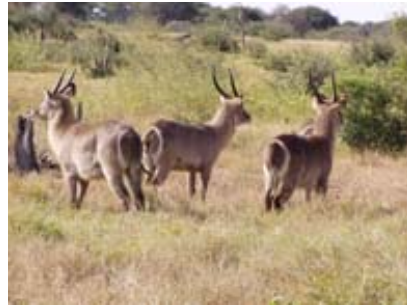

*random control*

breed

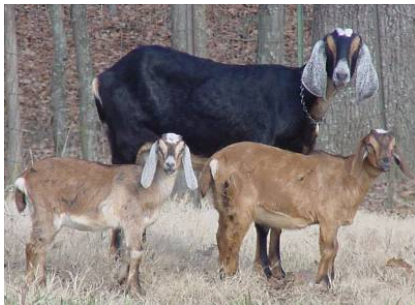

*predicted*

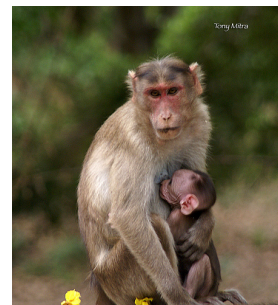

*random control*

dispatch

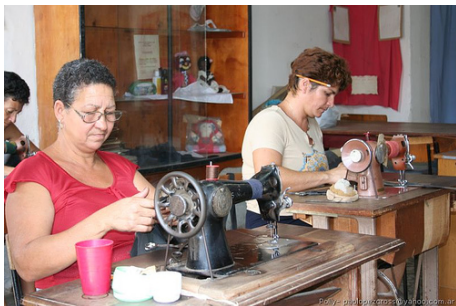

*predicted*

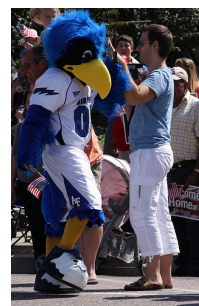

*random control*

behalf

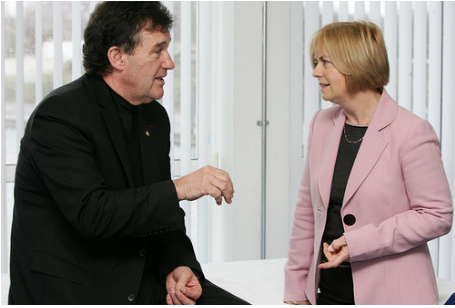

*predicted*

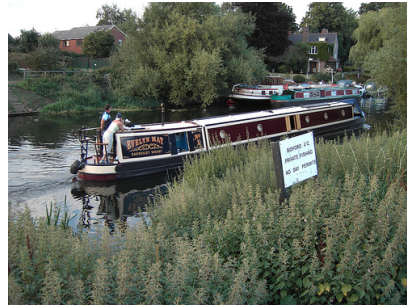

*random control*

guardian

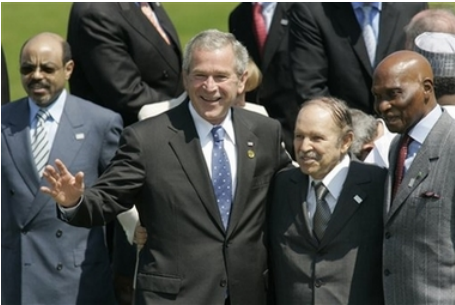

*predicted*

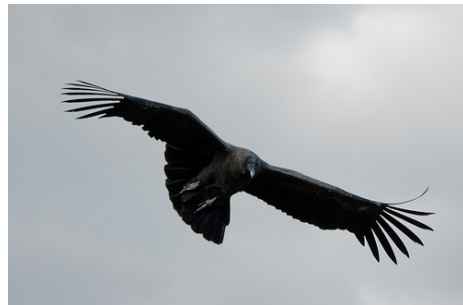

*random control*

temp

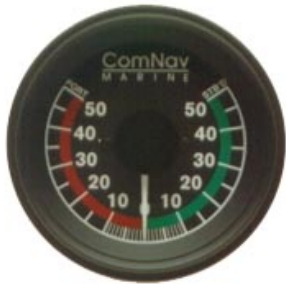

*predicted*

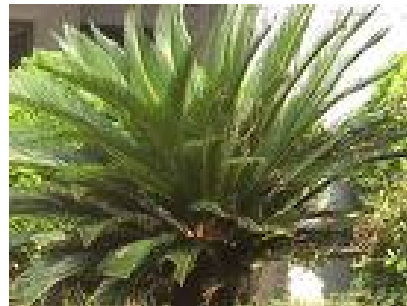

*random control*

initiative

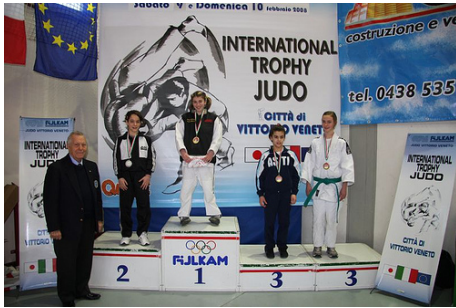

*predicted*

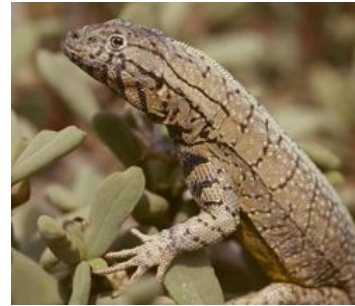

*random control*

communion

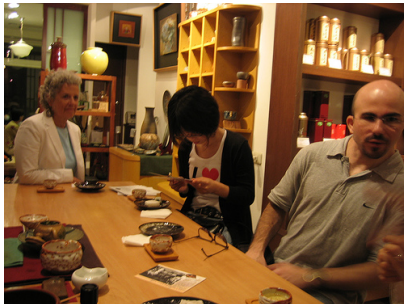

*predicted*

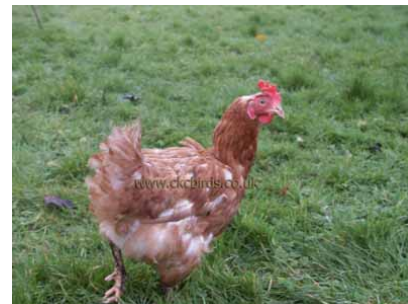

*random control*

inning

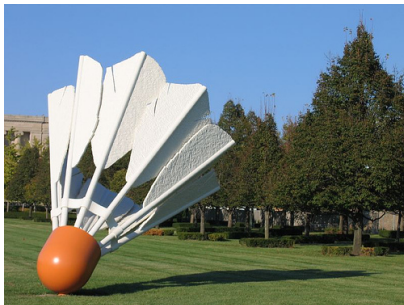

*predicted*

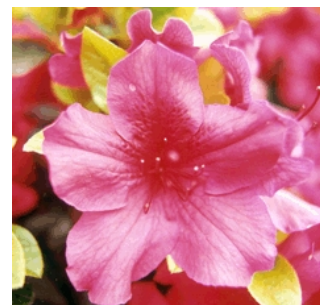

*random control*

jealousy

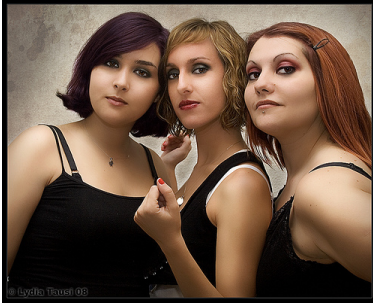

*predicted*

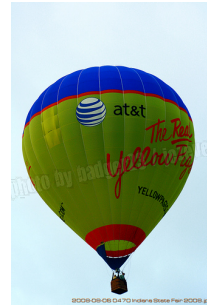

*random control*

conspiracy

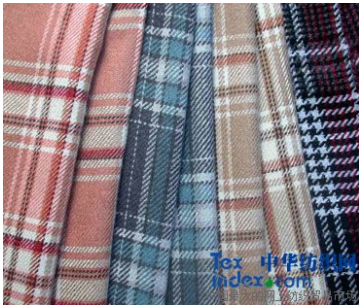

*predicted*

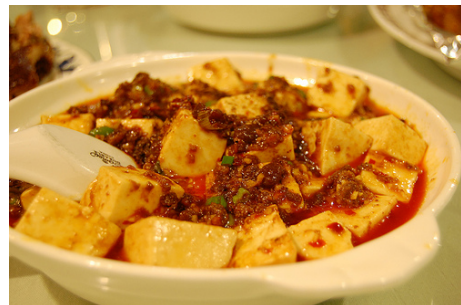

*random control*

suspense

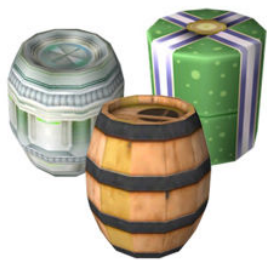

*predicted*

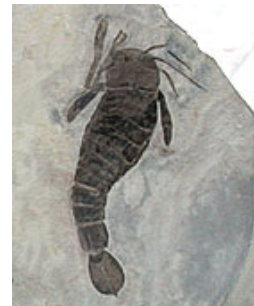

*random control*

thousand

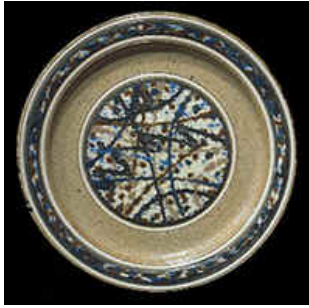

*predicted*

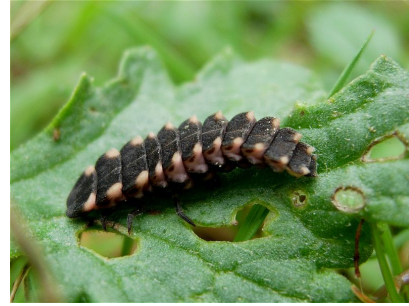

*random control*

classic

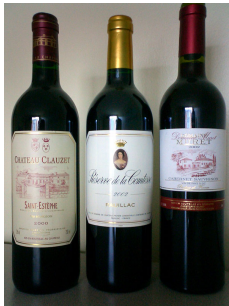

*predicted*

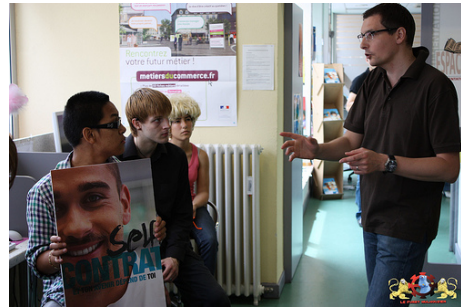

*random control*

ticket

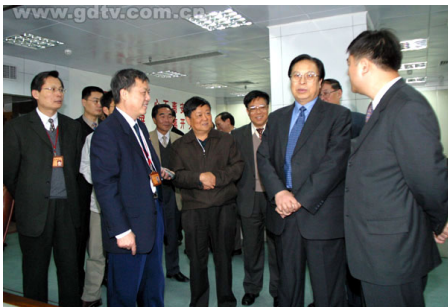

*predicted*

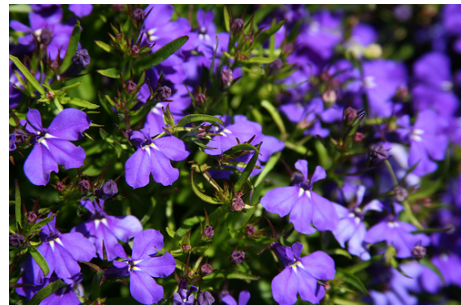

*random control*

diversion

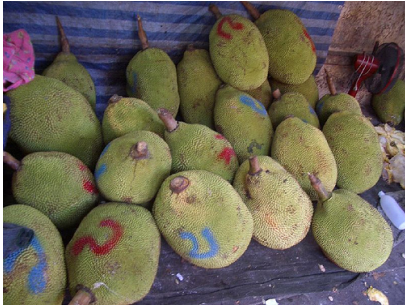

*predicted*

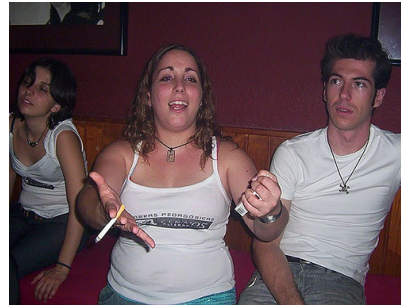

*random control*

southwest

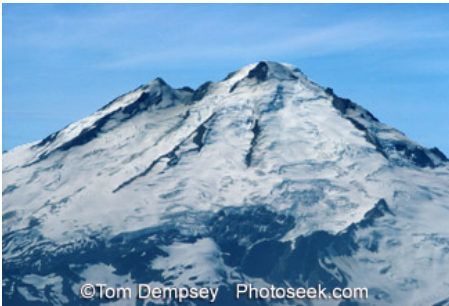

©Tom Dempsey Photoseek.com

*predicted*

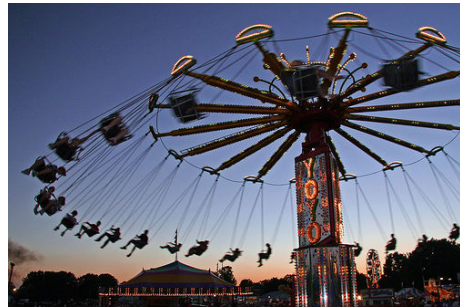

*random control*

research

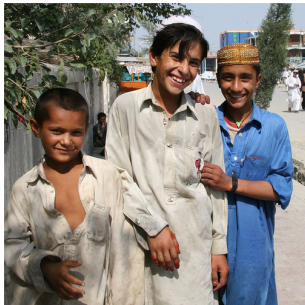

*predicted*

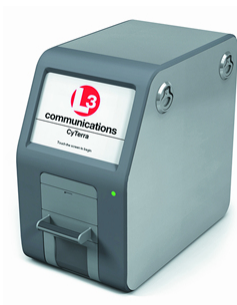

*random control*

horror

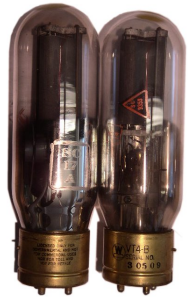

*predicted*

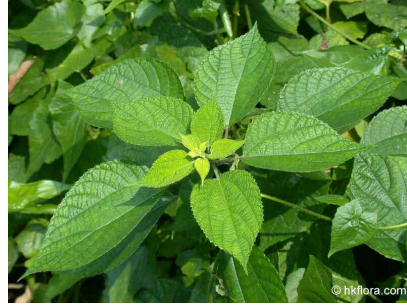

*random control*

corporation

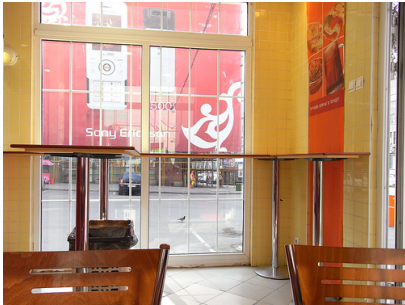

*predicted*

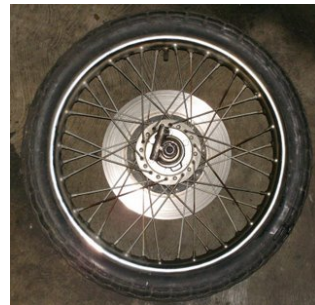

*random control*

rascal

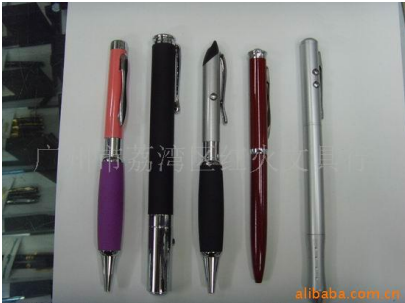

*predicted*

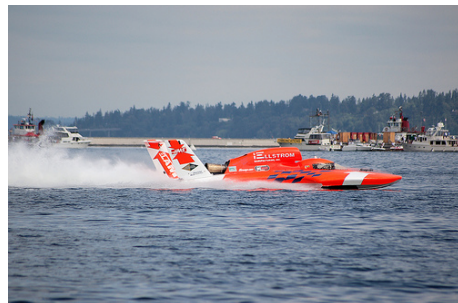

*random control*



parasite

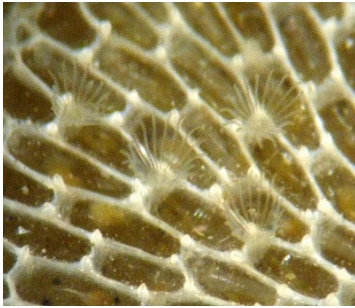

*predicted*

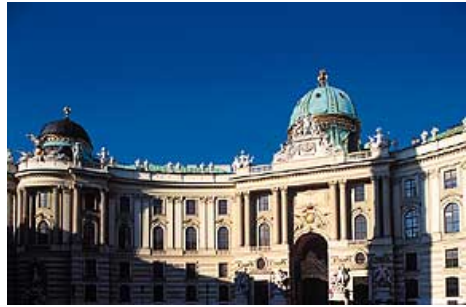

*random control*

direction

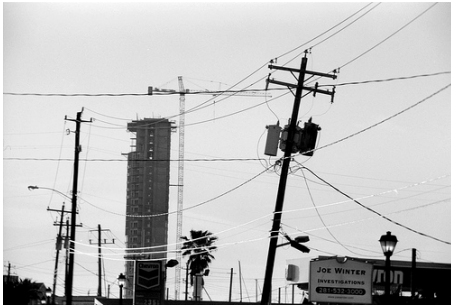

*predicted*

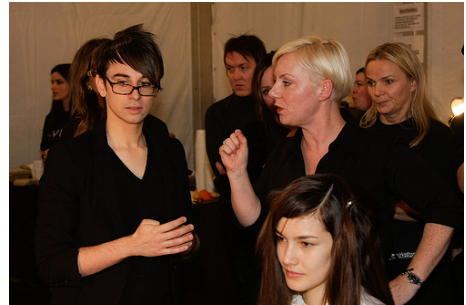

*random control*

speaking

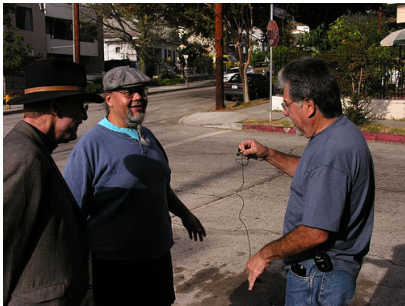

*predicted*

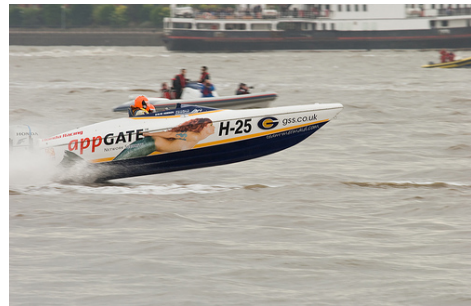

*random control*

thrill

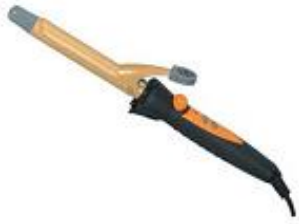

*predicted*

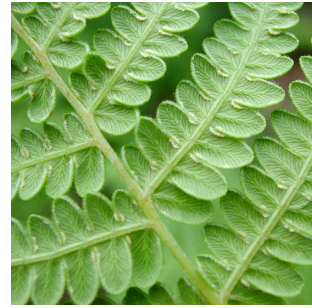

*random control*

executive

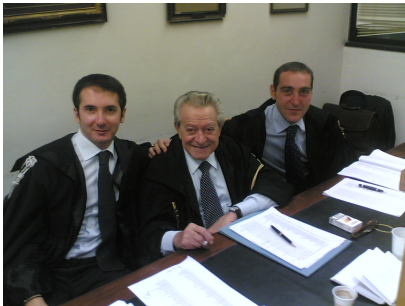

*predicted*

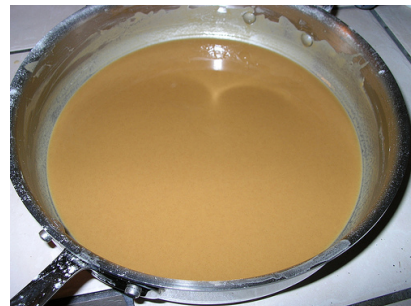

*random control*

freeman

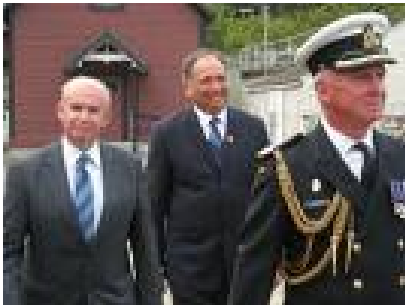

*predicted*

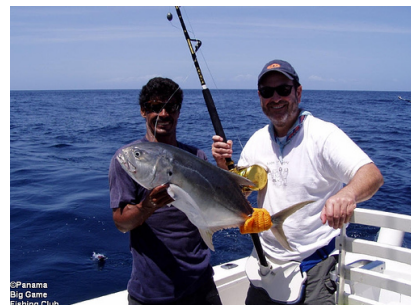

*random control*

religion

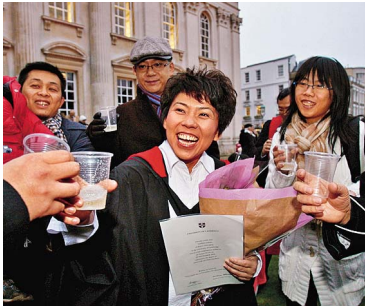

*predicted*

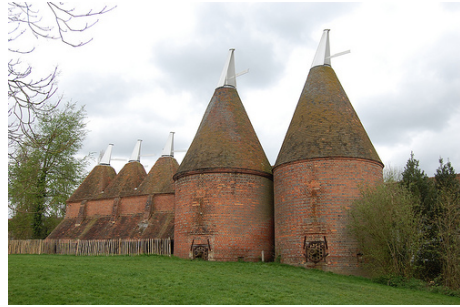

*random control*

tale

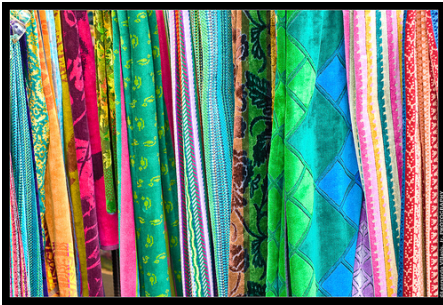

*predicted*

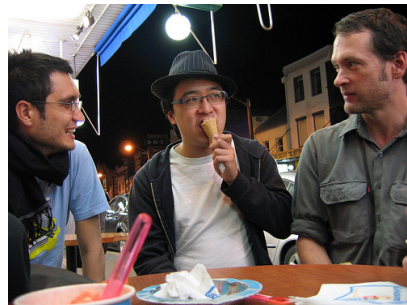

*random control*

energy

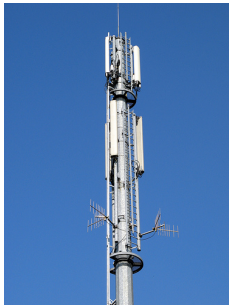

*predicted*

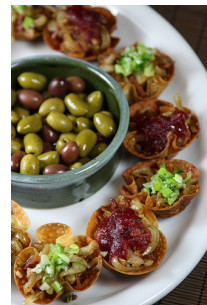

*random control*

army

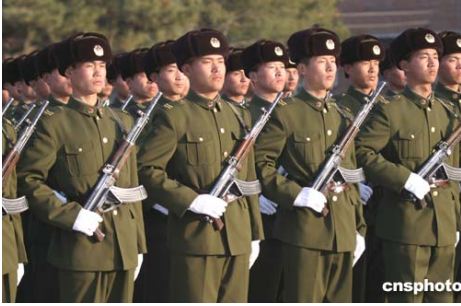

*predicted*

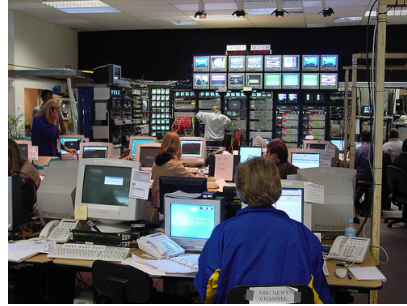

*random control*

paradise

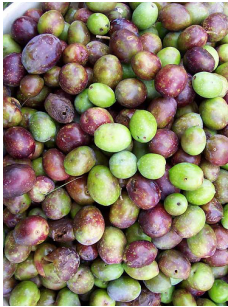

*predicted*

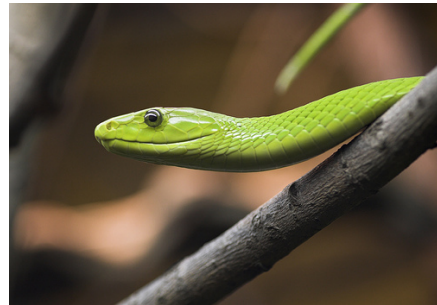

*random control*

shooting

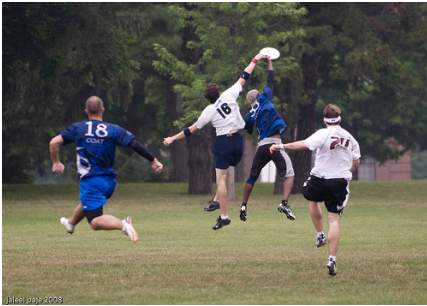

*predicted*

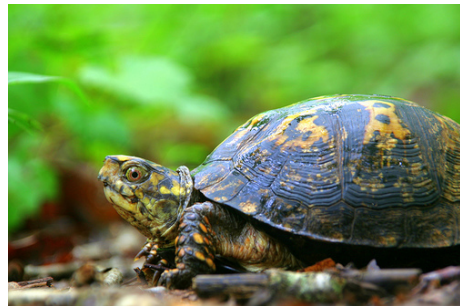

*random control*

choosing

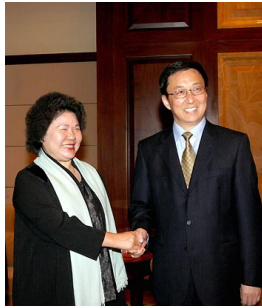

*predicted*

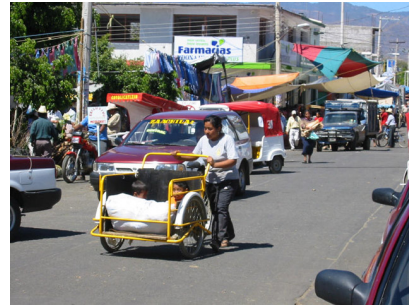

*random control*

tow

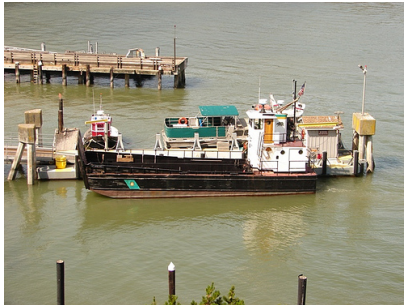

*predicted*

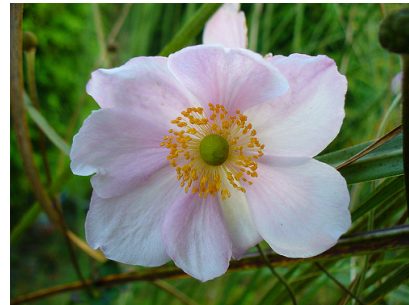

*random control*

scenery

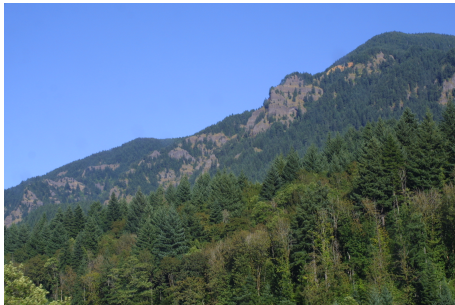

*predicted*

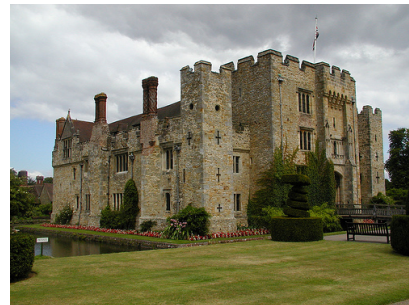

*random control*

**resume**

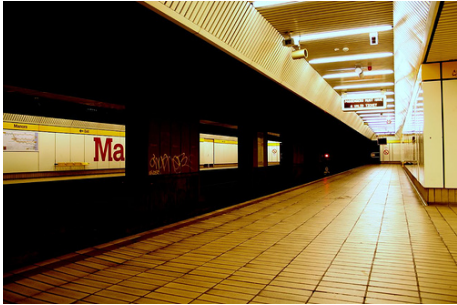

*predicted*

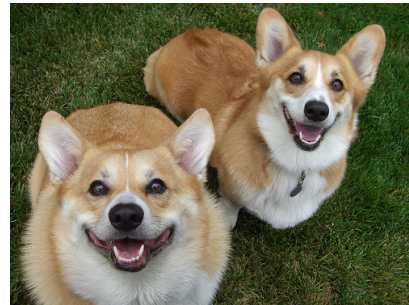

*random control*

**semen**

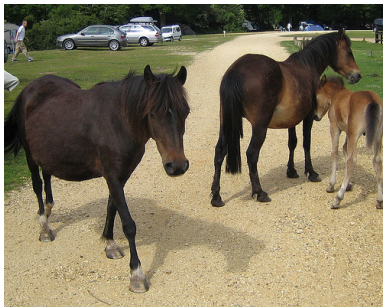

*predicted*

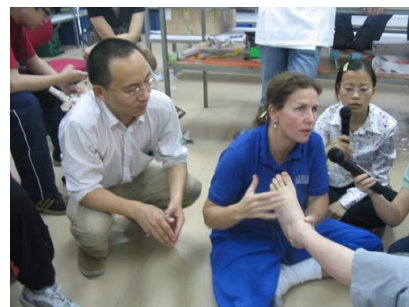

*random control*

**engagement**

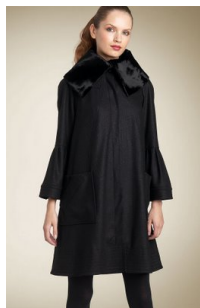

*predicted*

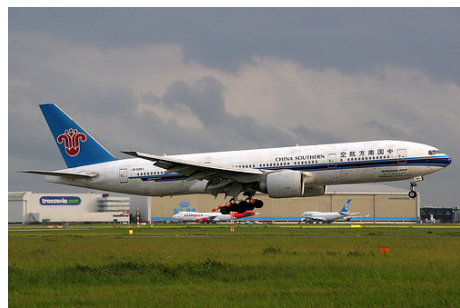

*random control*

heavy

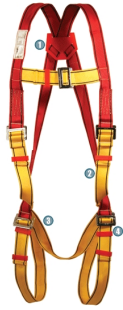

*predicted*

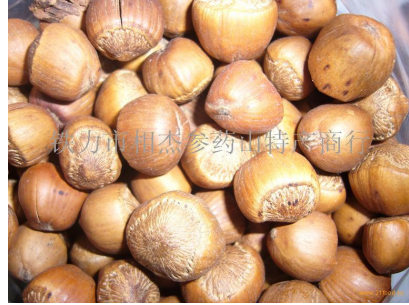

*random control*

workshop

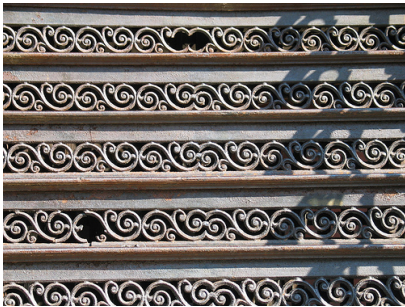

*predicted*

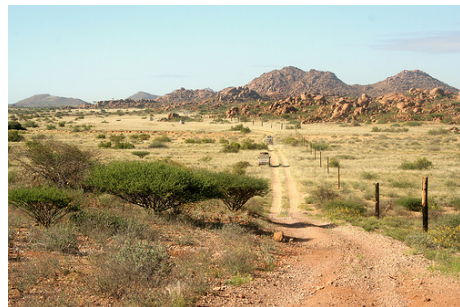

*random control*

voting

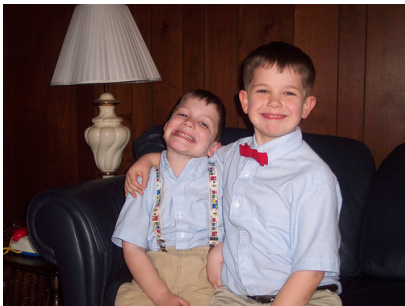

*predicted*

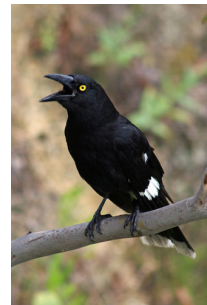

*random control*

**fingerprint**

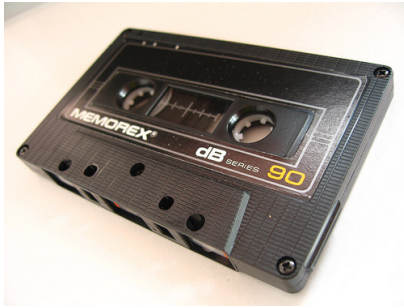

*predicted*

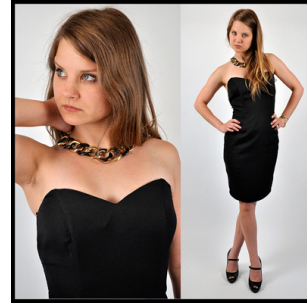

*random control*

**hooray**

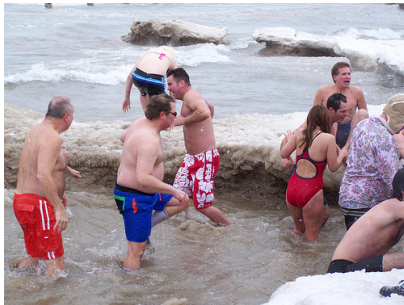

*predicted*

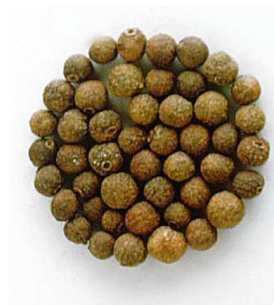

*random control*

**carry**

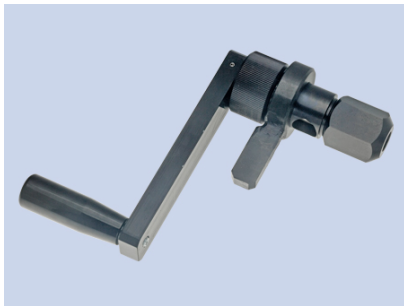

*predicted*

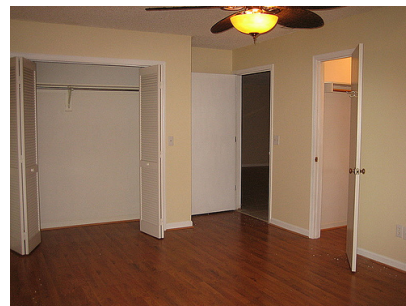

*random control*



**lunatic**

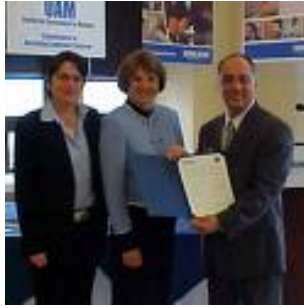

*predicted*

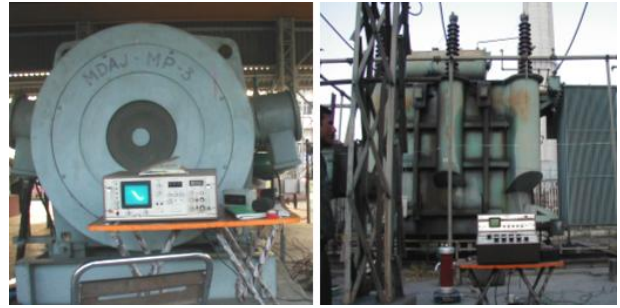

*random control*

**gangster**

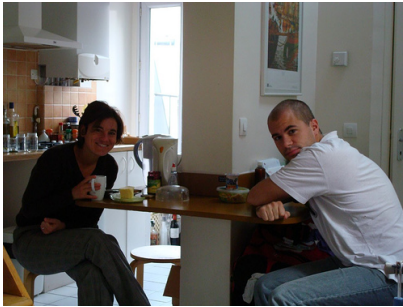

*predicted*

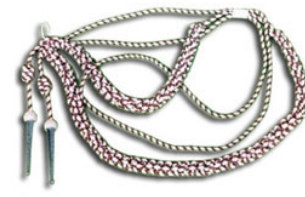

*random control*

**evidence**

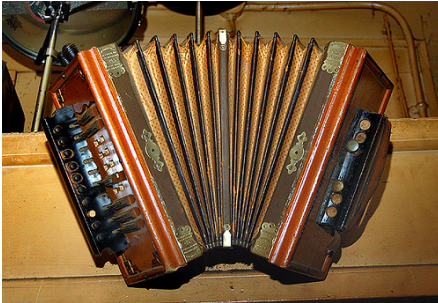

*predicted*

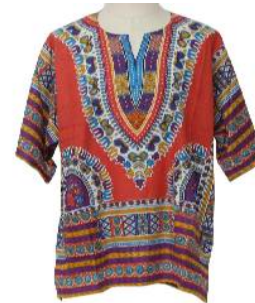

*random control*

plan

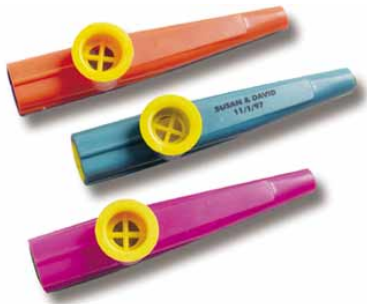

*predicted*

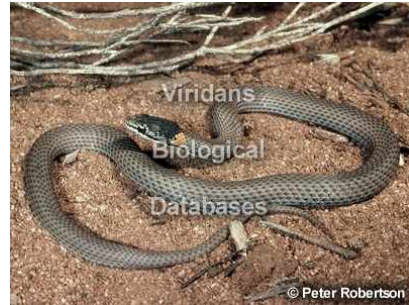

*random control*

economics

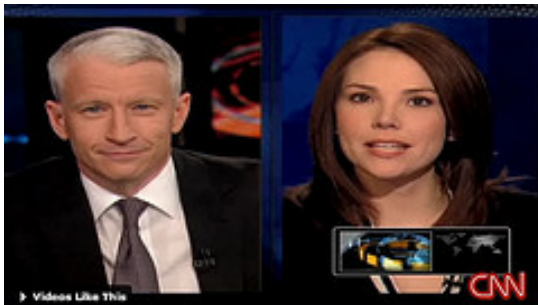

*predicted*

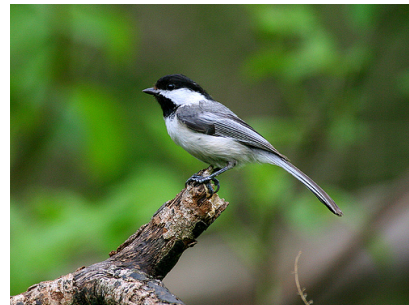

*random control*

coverage

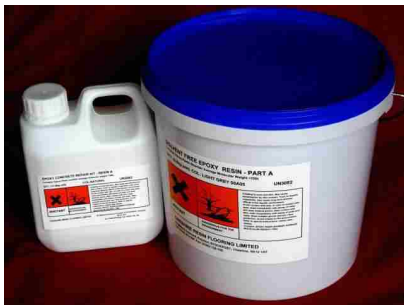

*predicted*

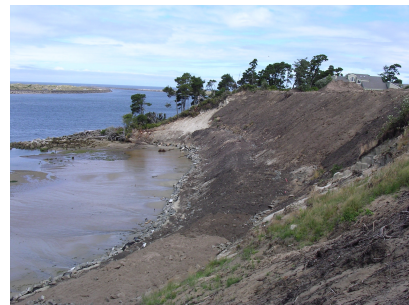

*random control*

parent

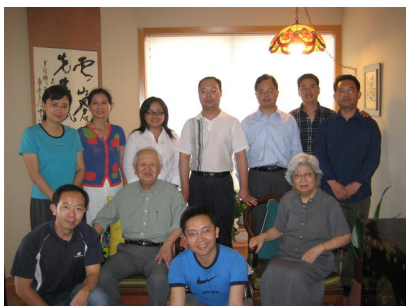

*predicted*

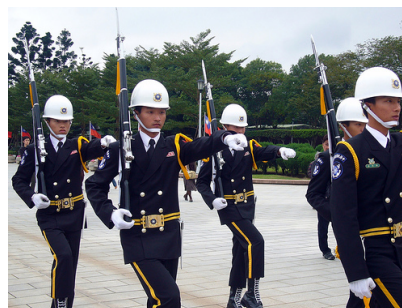

*random control*

pipeline

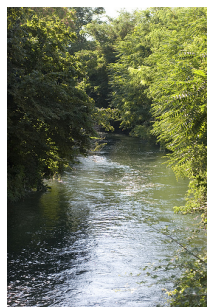

*predicted*

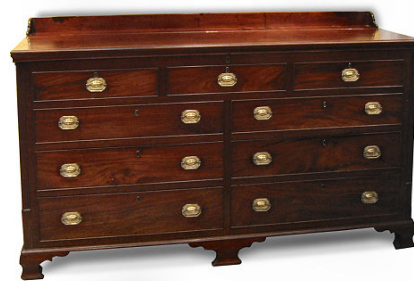

*random control*

fiend

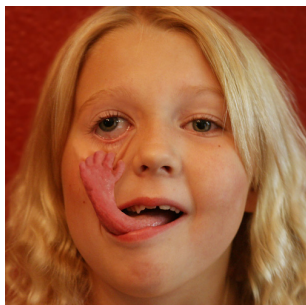

*predicted*

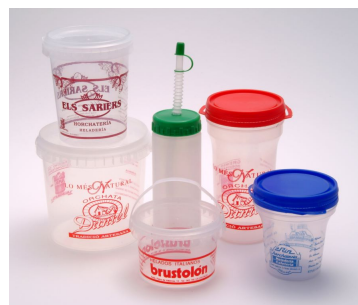

*random control*

**debate**

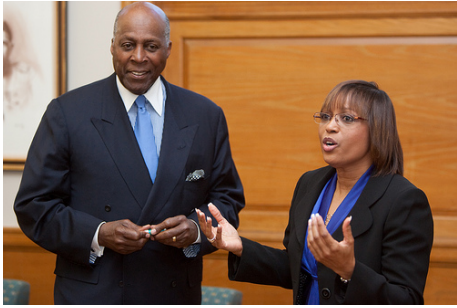

*predicted*

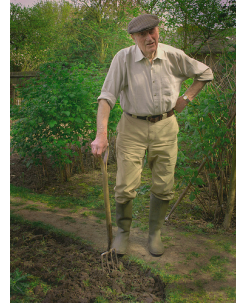

*random control*

**sarcasm**

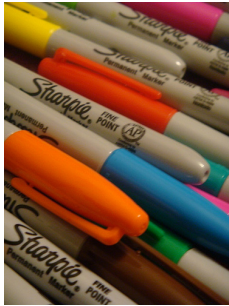

*predicted*

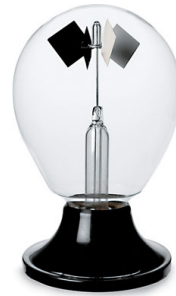

*random control*

**flush**

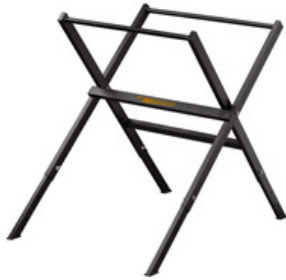

*predicted*

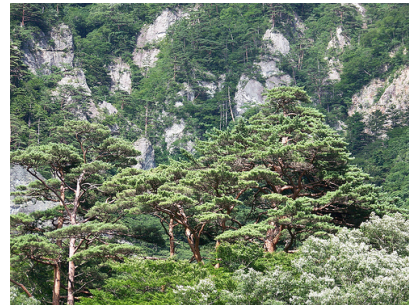

*random control*

**importance**

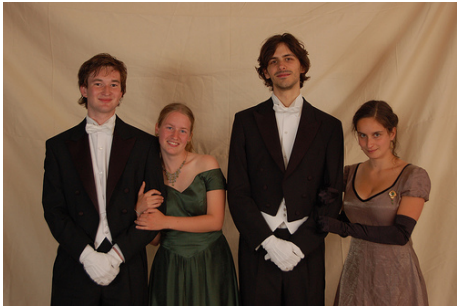

*predicted*

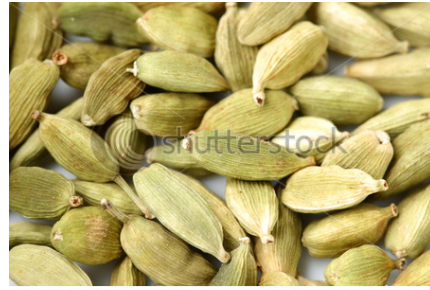

www.shutterstock.com - 35381902

*random control*

**share**

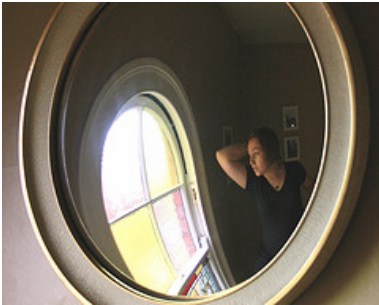

*predicted*

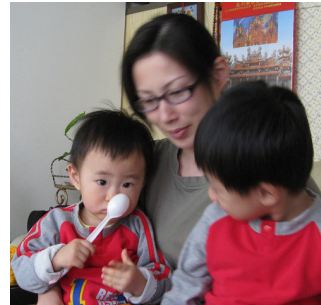

*random control*

**supreme**

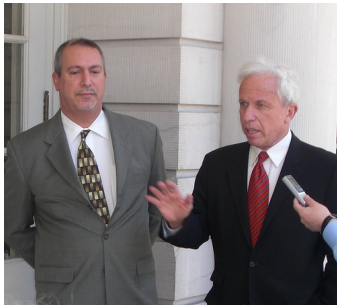

*predicted*

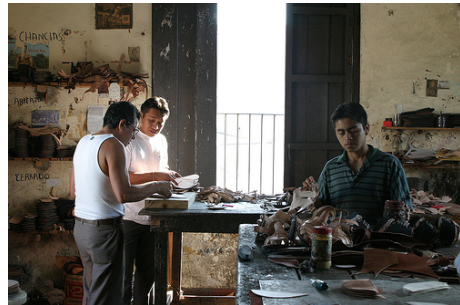

*random control*

avoid

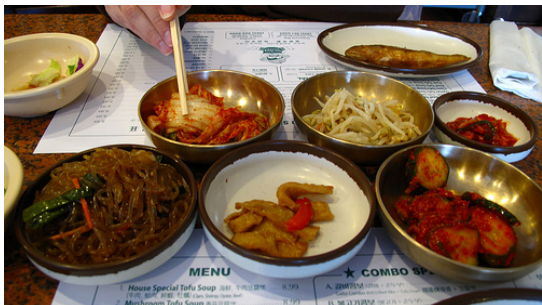

*predicted*

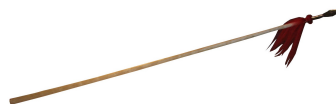

*random control*

capital

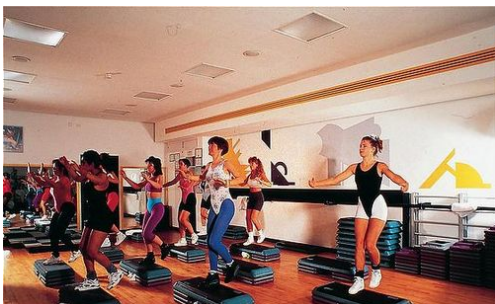

*predicted*

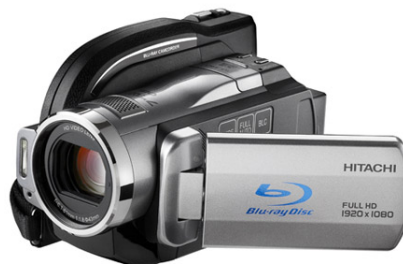

*random control*

rating

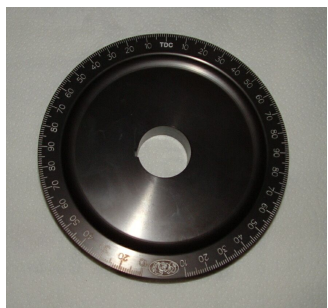

*predicted*

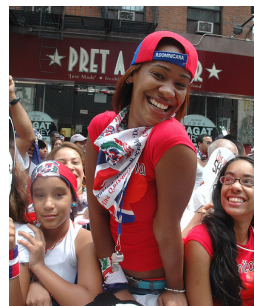

*random control*

manner

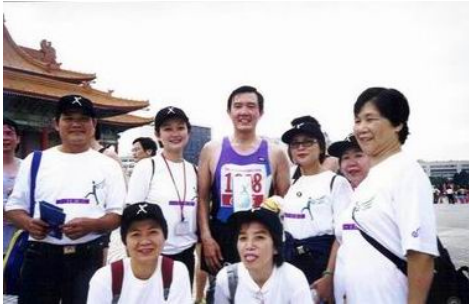

*predicted*

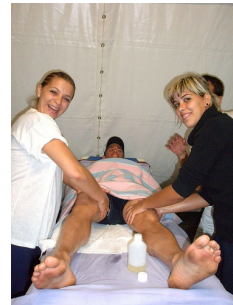

*random control*

fuss

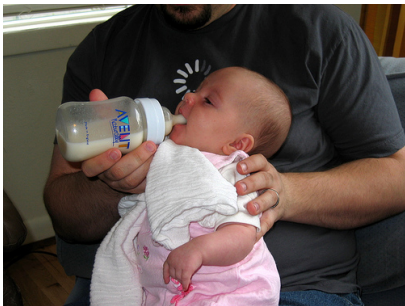

*predicted*

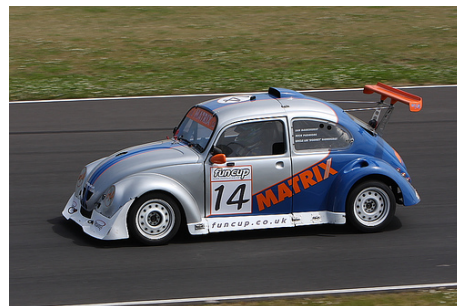

*random control*

prairie

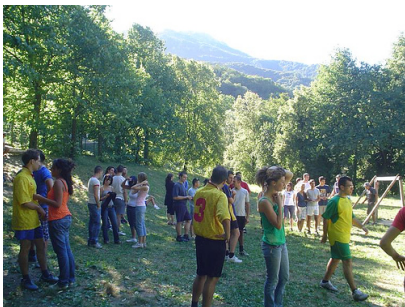

*predicted*

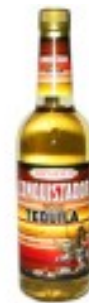

*random control*

affair

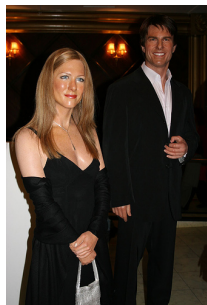

*predicted*

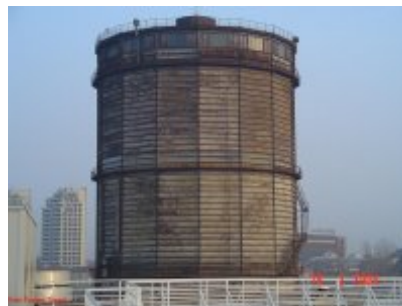

*random control*

forum

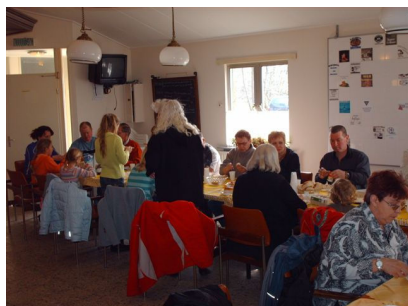

*predicted*

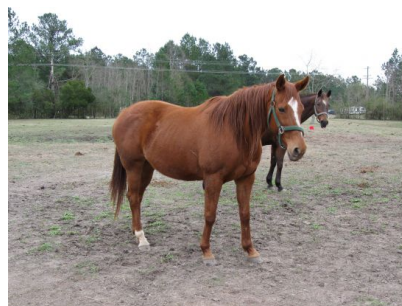

*random control*

sale

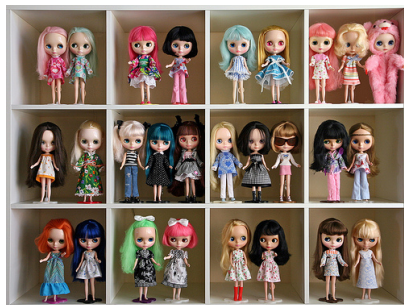

*predicted*

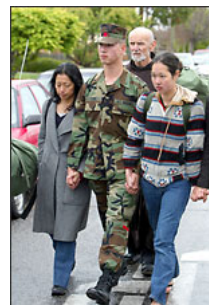

*random control*



**hurry**

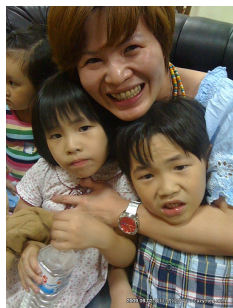

*predicted*

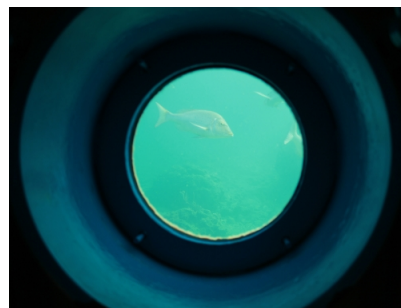

*random control*

**faith**

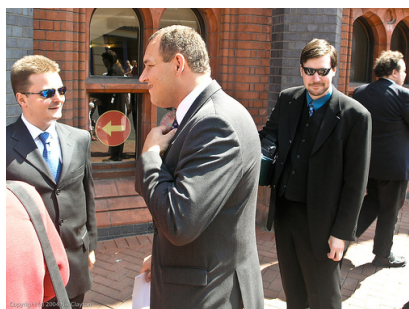

*predicted*

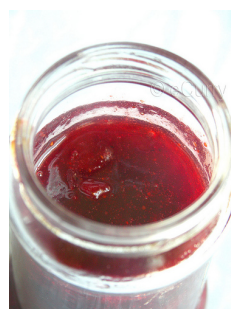

*random control*

**elf**

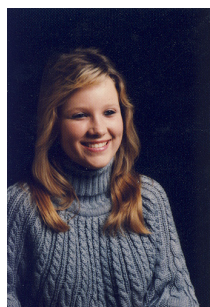

*predicted*

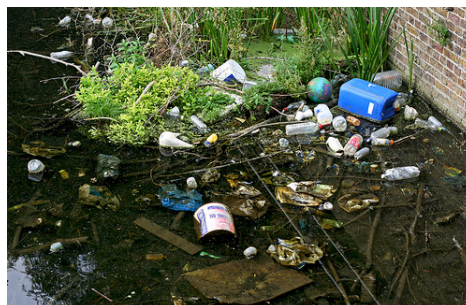

*random control*

rebound

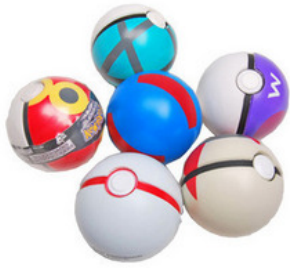

*predicted*

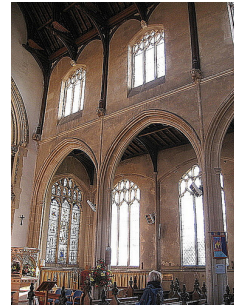

*random control*

beginning

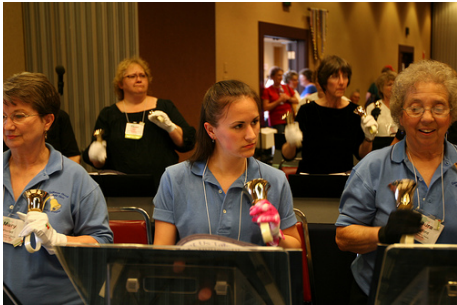

*predicted*

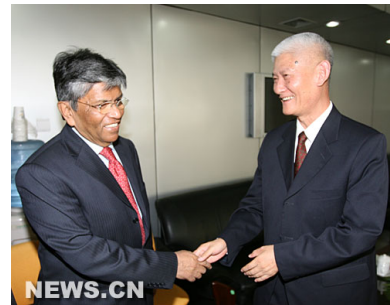

*random control*

pageant

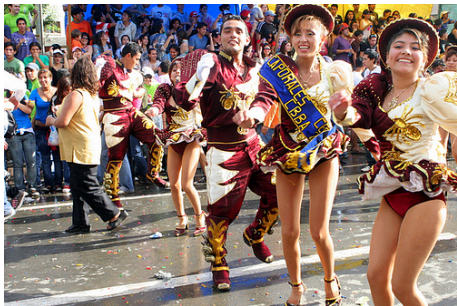

*predicted*

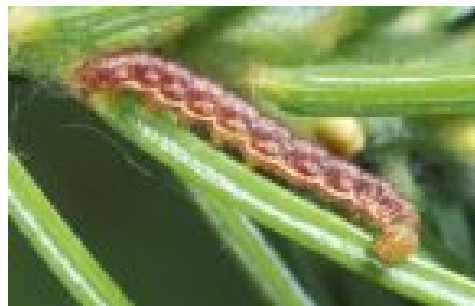

*random control*

subconscious

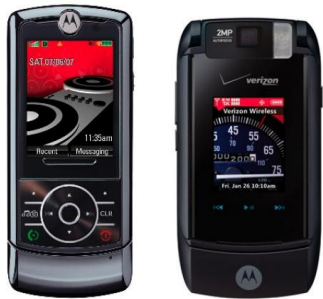

*predicted*

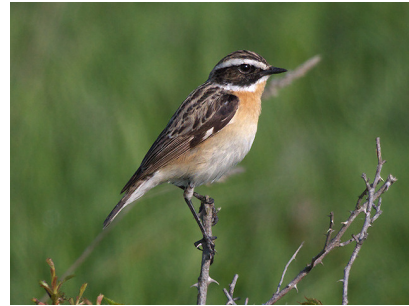

*random control*

demonstration

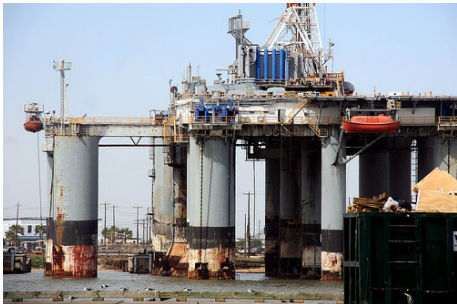

*predicted*

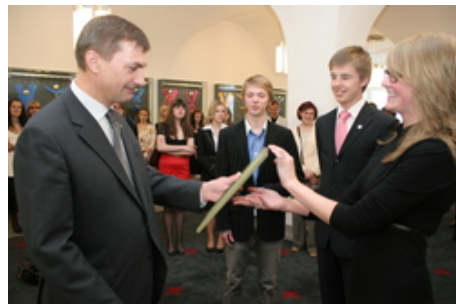

*random control*

relation

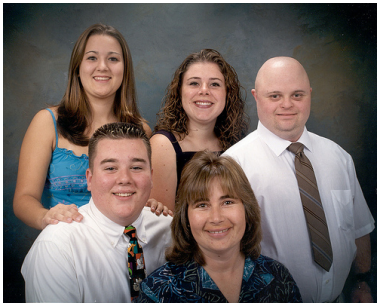

*predicted*

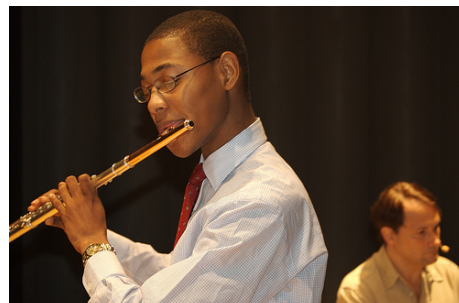

*random control*

psychologist

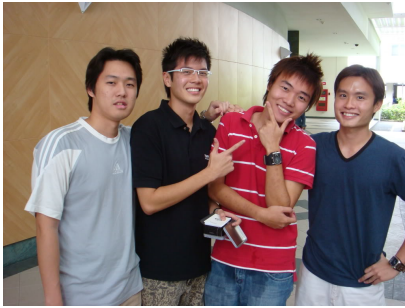

*predicted*

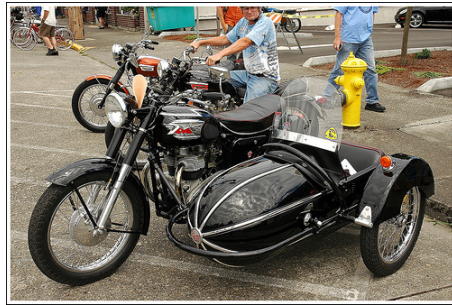

*random control*

generation

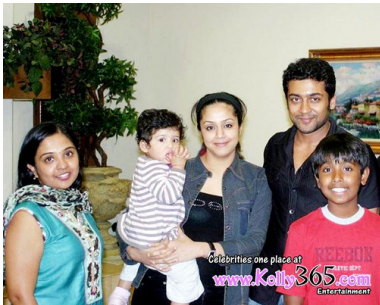

*predicted*

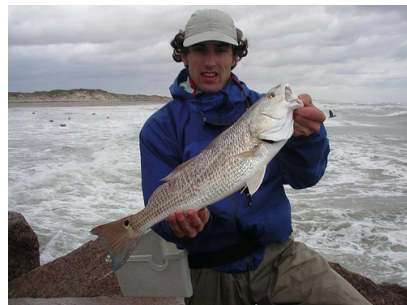

*random control*

term

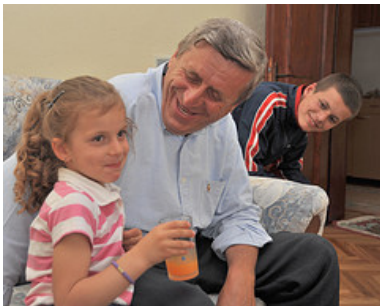

*predicted*

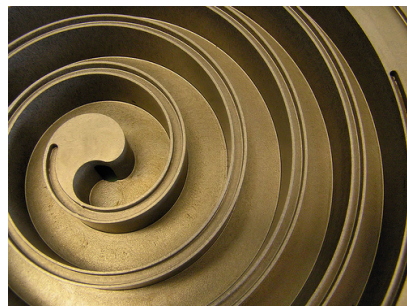

*random control*

automobile

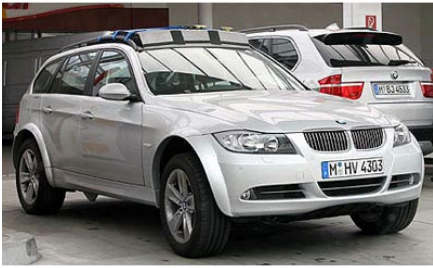

*predicted*

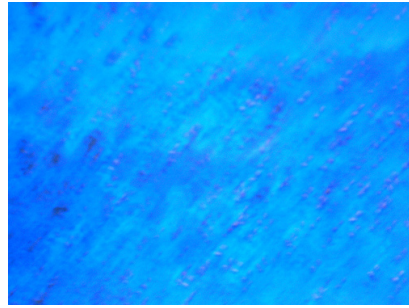

*random control*

millennium

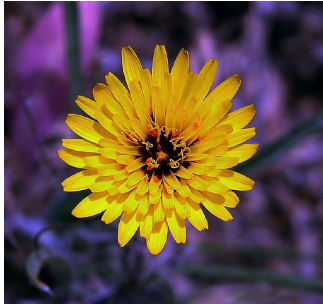

*predicted*

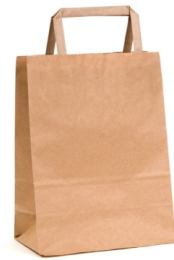

*random control*

low

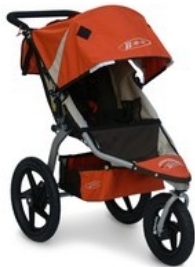

*predicted*

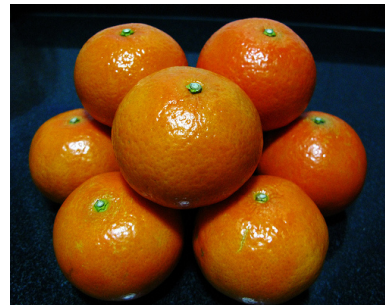

*random control*

virus

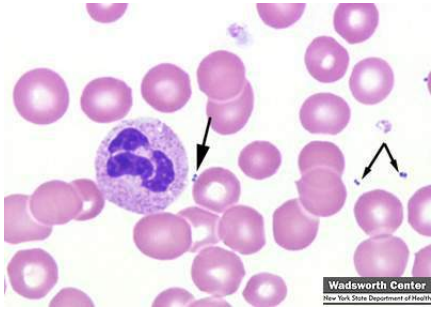

*predicted*

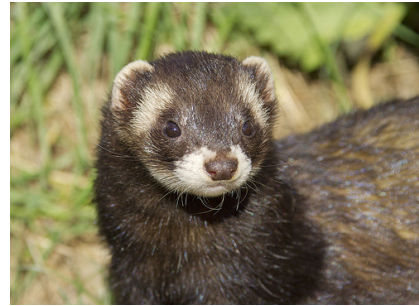

*random control*

ache

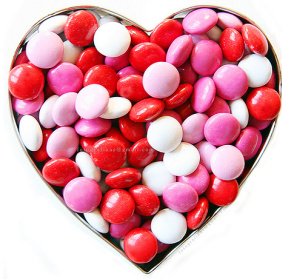

*predicted*

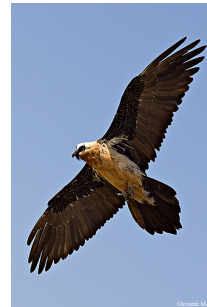

*random control*

fed

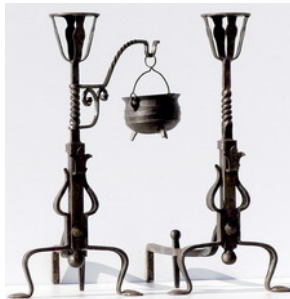

*predicted*

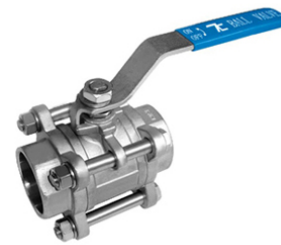

*random control*

list

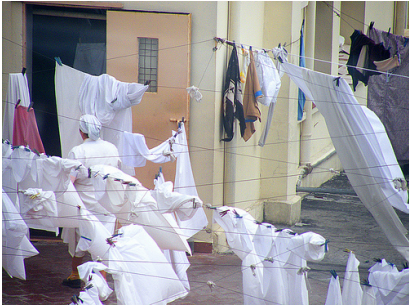

*predicted*

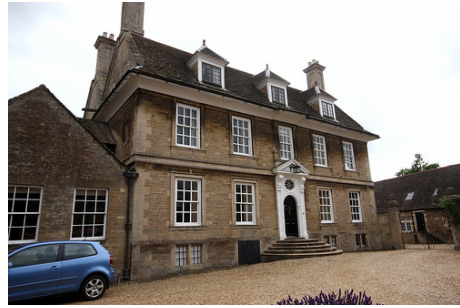

*random control*

cripple

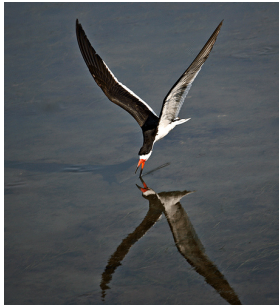

*predicted*

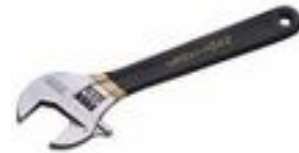

*random control*

sore

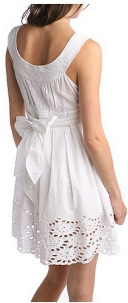

*predicted*

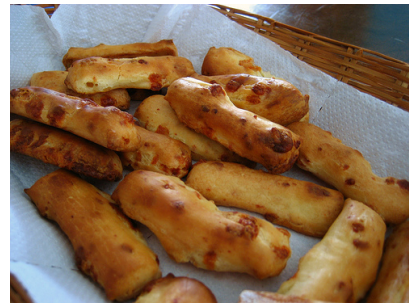

*random control*

entertainment

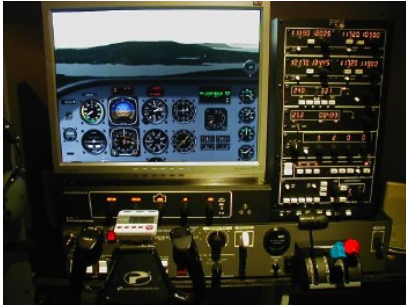

*predicted*

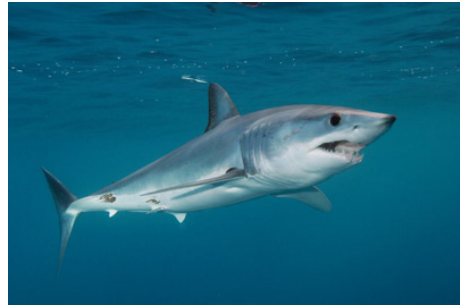

*random control*

fusion

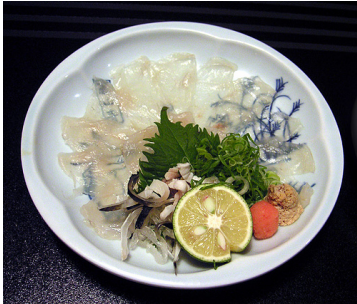

*predicted*

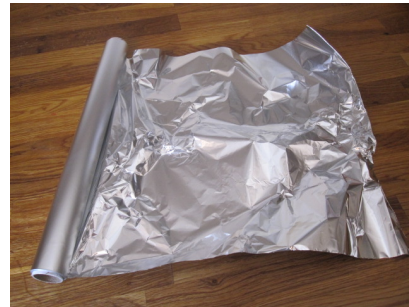

*random control*

proposal

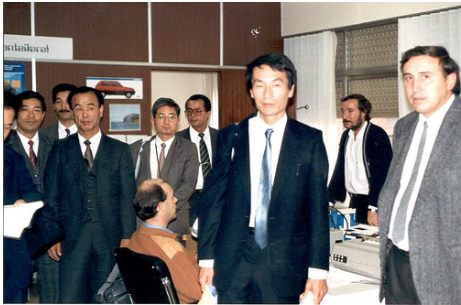

*predicted*

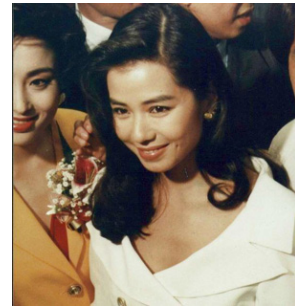

*random control*



driving

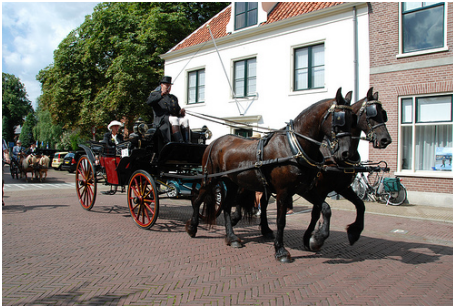

*predicted*

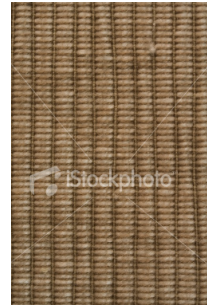

*random control*

piss

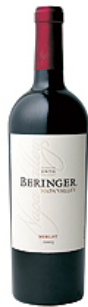

*predicted*

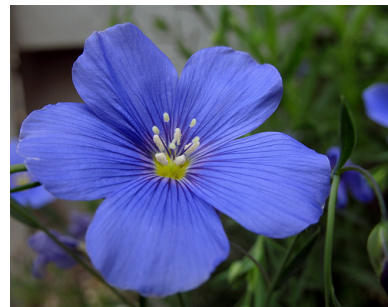

*random control*

message

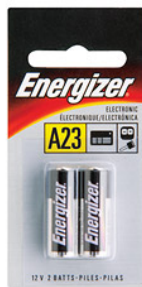

*predicted*

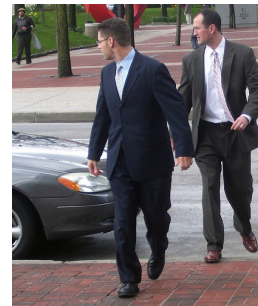

*random control*

address

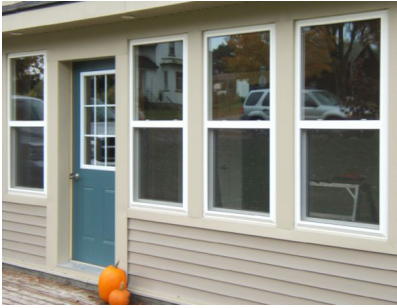

*predicted*

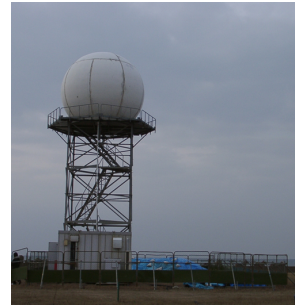

*random control*

oil

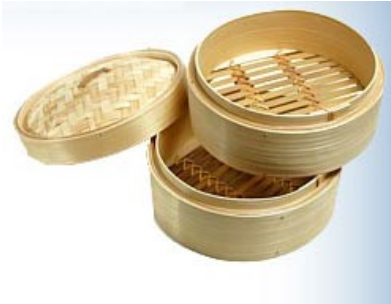

*predicted*

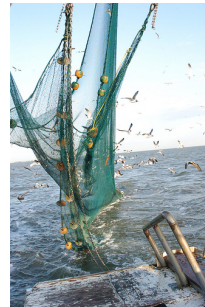

*random control*

lifetime

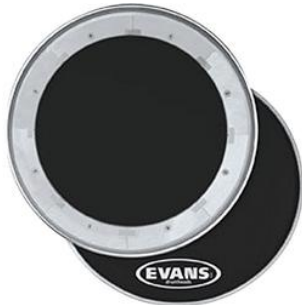

*predicted*

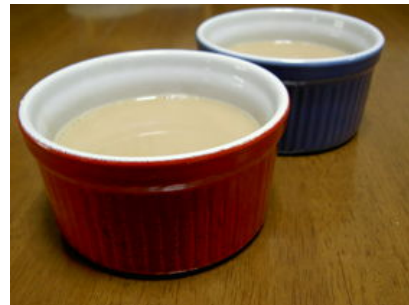

*random control*

slayer

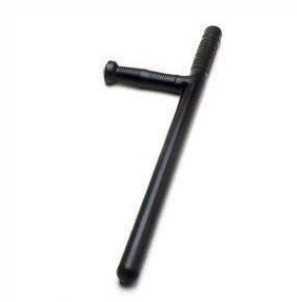

*predicted*

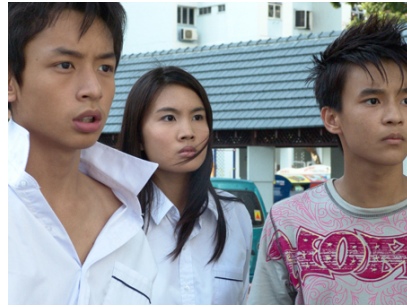

*random control*

explanation

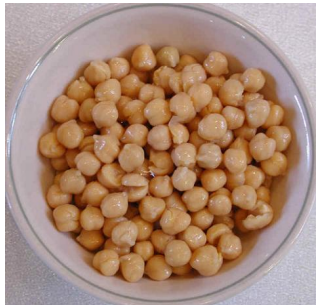

*predicted*

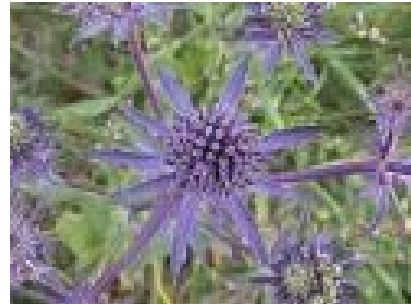

*random control*

spotlight

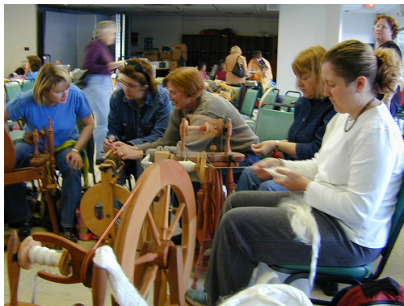

*predicted*

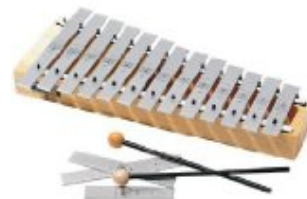

*random control*

article

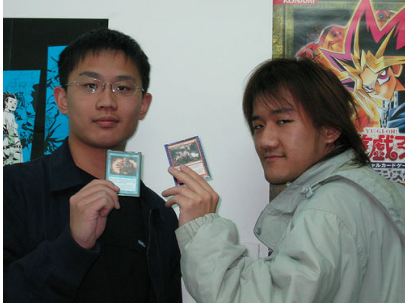

*predicted*

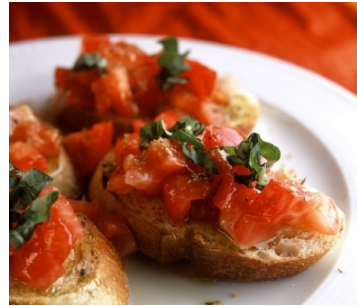

*random control*

series

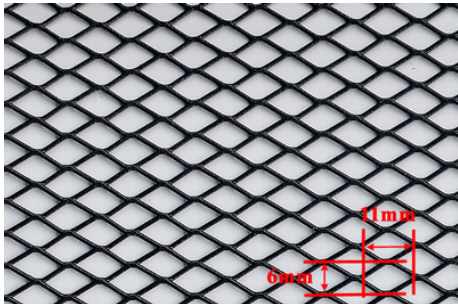

*predicted*

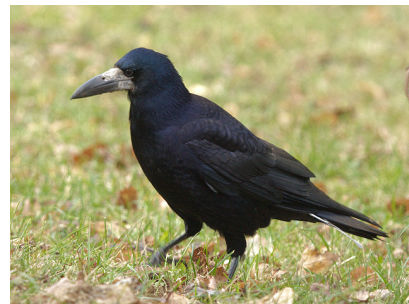

*random control*

exam

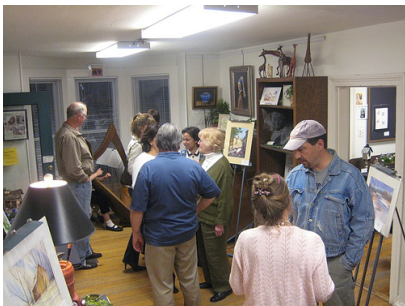

*predicted*

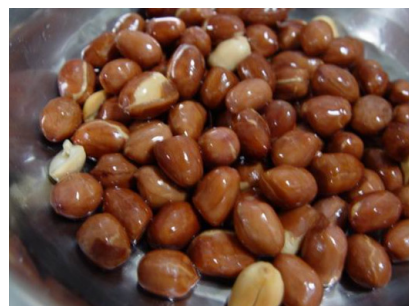

*random control*

disaster

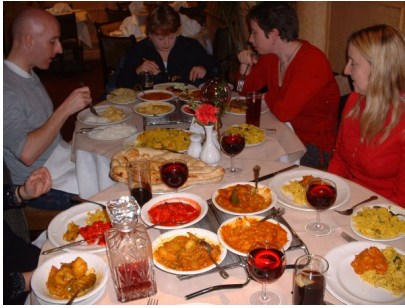

*predicted*

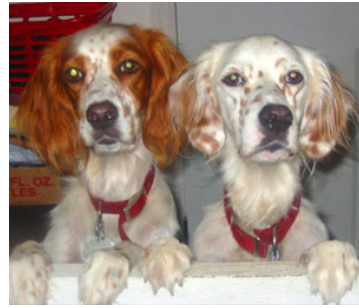

*random control*

river

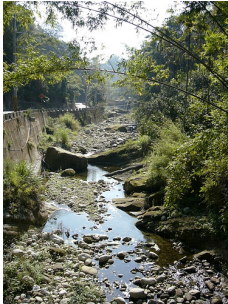

*predicted*

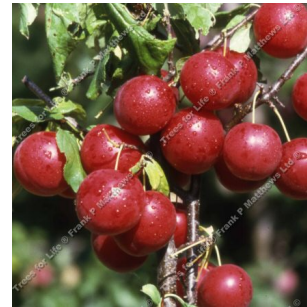

*random control*

ecstasy

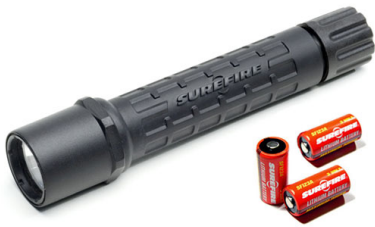

*predicted*

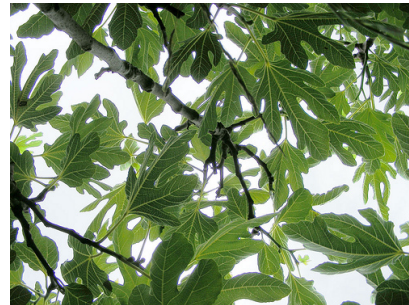

*random control*

shape

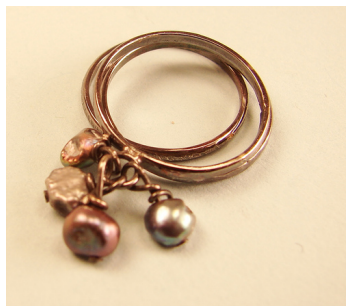

*predicted*

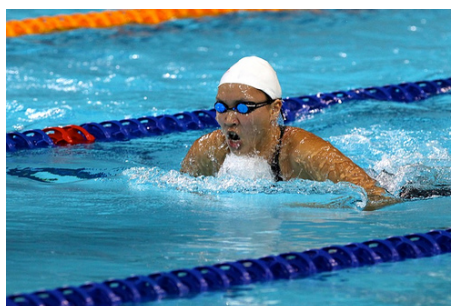

*random control*

ulcer

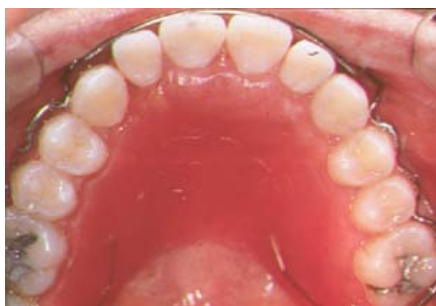

*predicted*

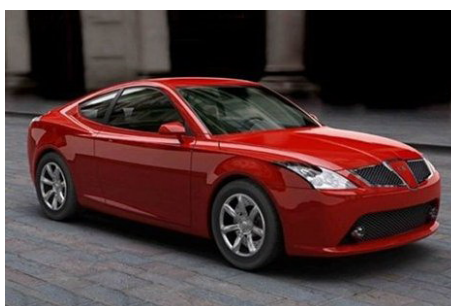

*random control*

test

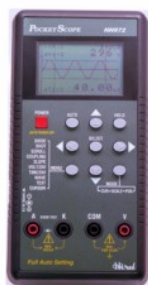

*predicted*

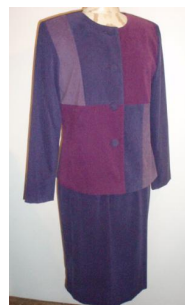

*random control*

population

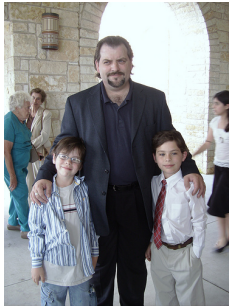

*predicted*

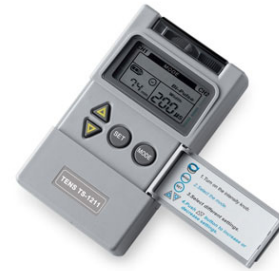

*random control*

getaway

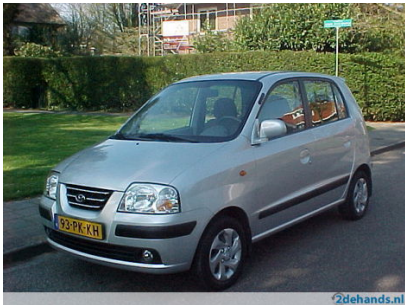

*predicted*

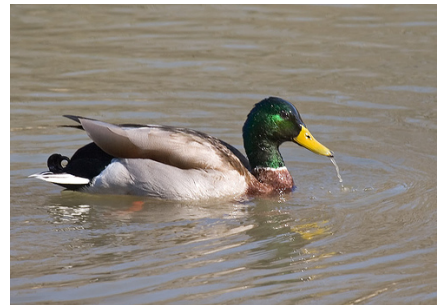

*random control*

goddess

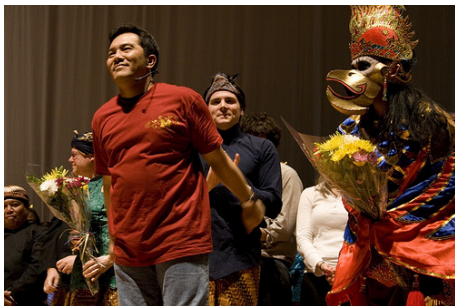

*predicted*

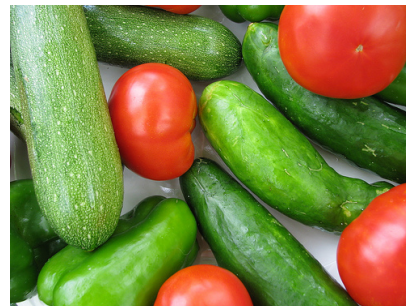

*random control*

consultant

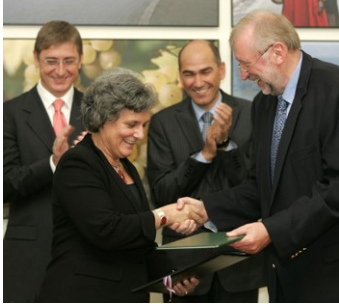

*predicted*

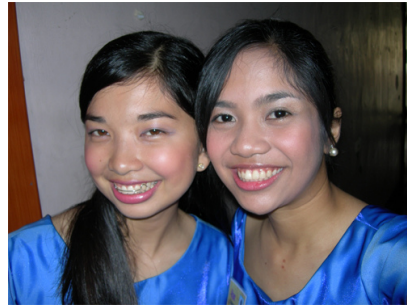

*random control*

psychiatry

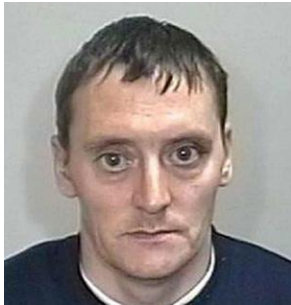

*predicted*

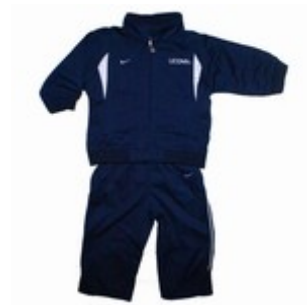

*random control*

feed

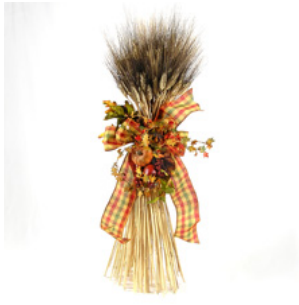

*predicted*

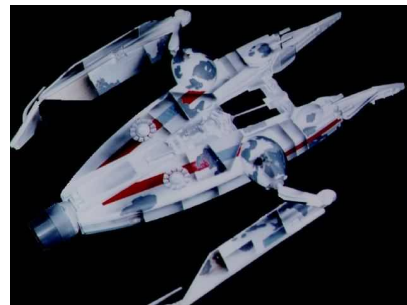

*random control*



administration

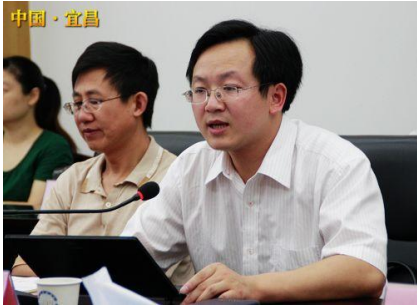

*predicted*

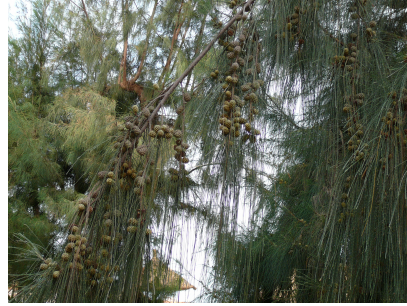

*random control*

manufacture

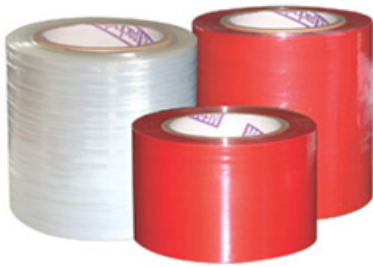

*predicted*

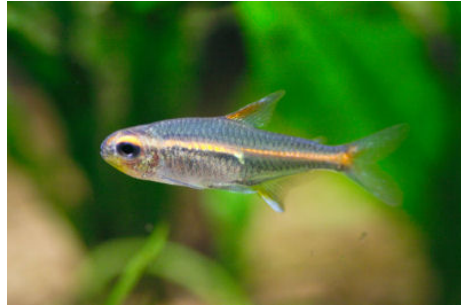

*random control*

thesis

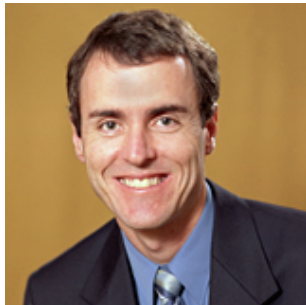

*predicted*

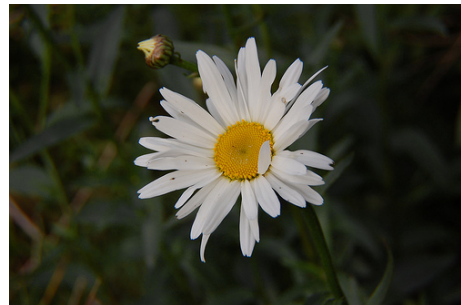

*random control*

bulletin

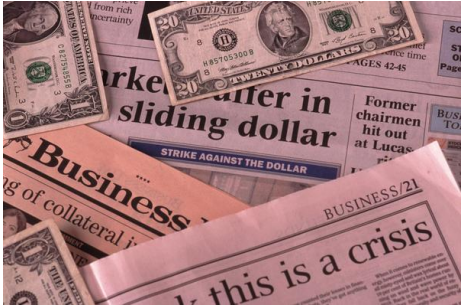

*predicted*

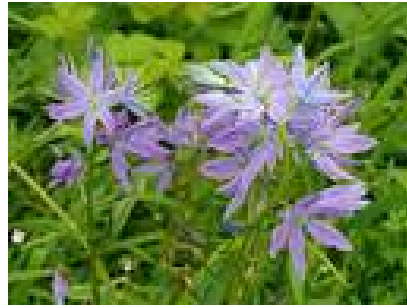

*random control*

tenth

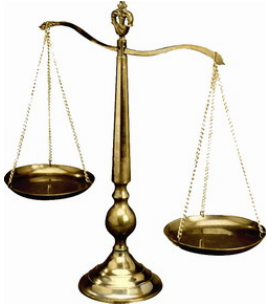

*predicted*

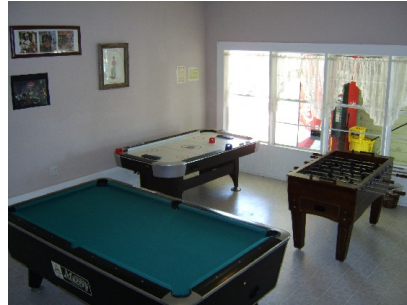

*random control*

final

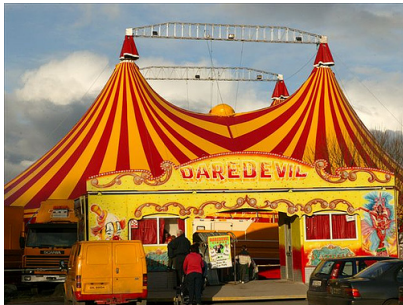

*predicted*

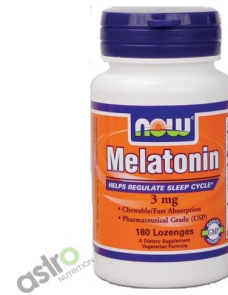

*random control*

postman

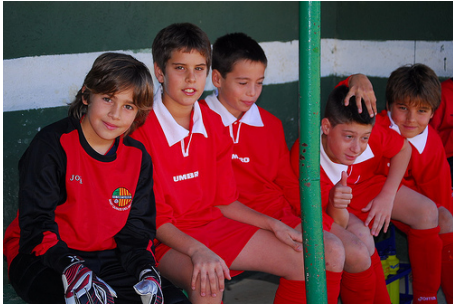

*predicted*

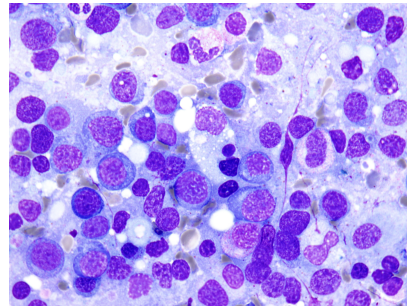

*random control*

payment

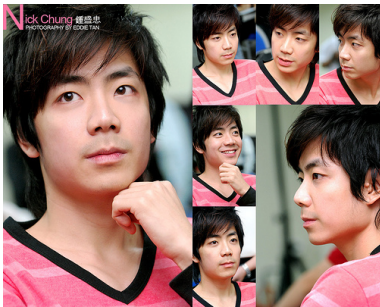

*predicted*

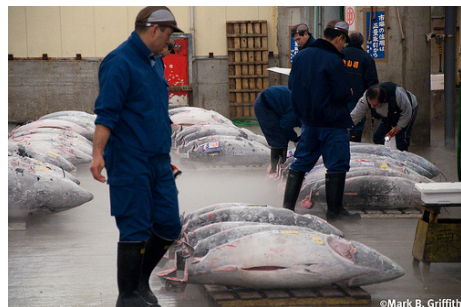

*random control*

posse

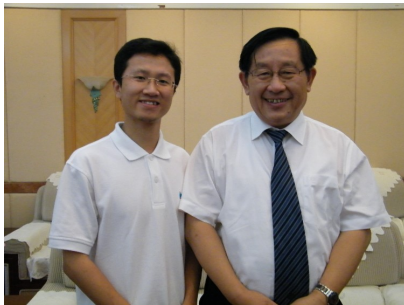

*predicted*

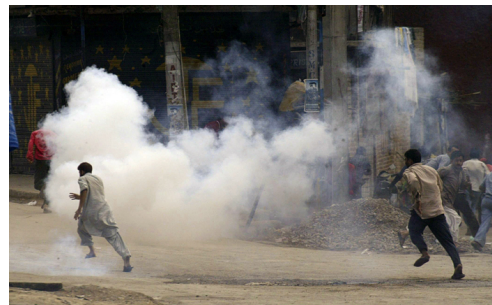

*random control*

**situation**

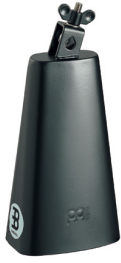

*predicted*

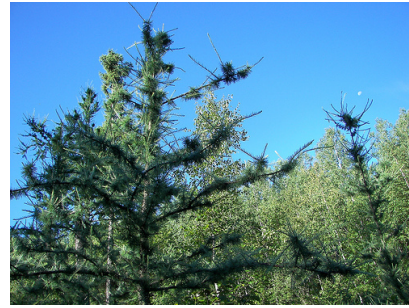

*random control*

**accusation**

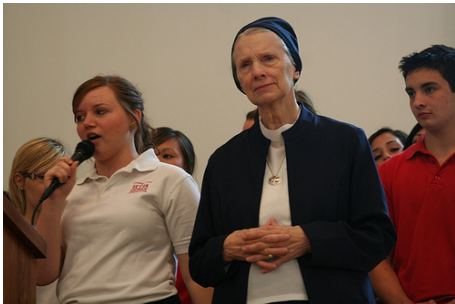

*predicted*

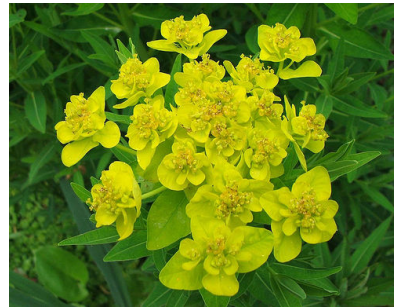

*random control*

**discussion**

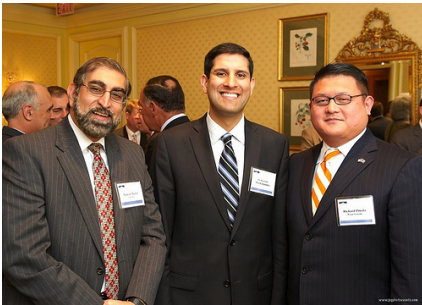

*predicted*

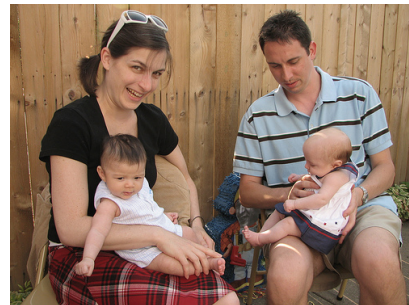

*random control*

**antenna**

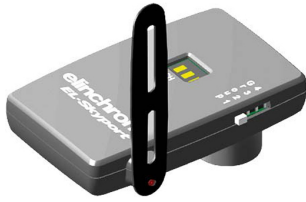

*predicted*

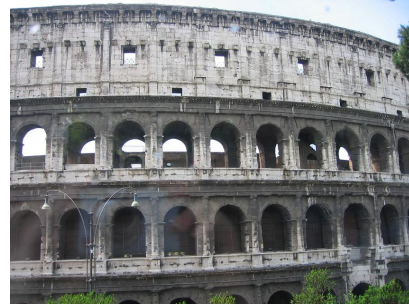

*random control*

**messenger**

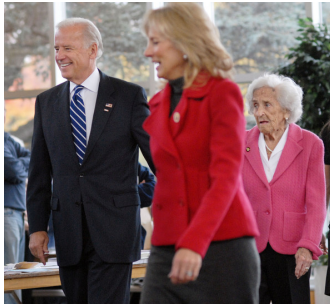

*predicted*

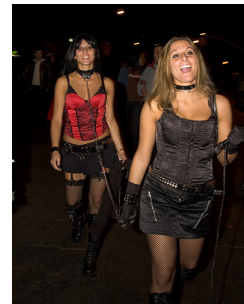

*random control*

**humiliation**

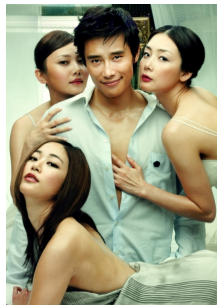

*predicted*

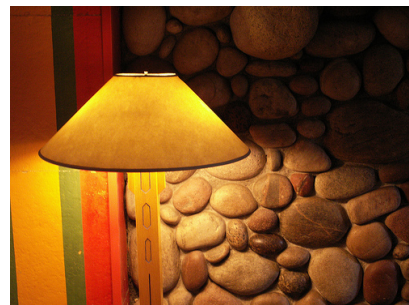

*random control*

appreciation

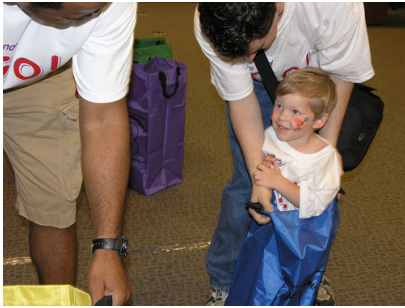

*predicted*

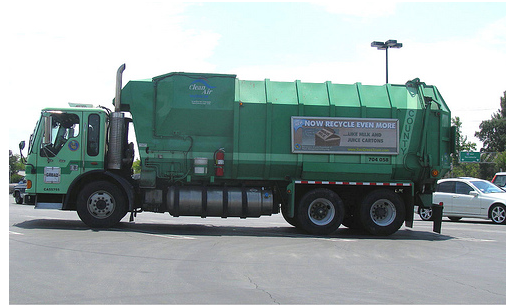

*random control*

note

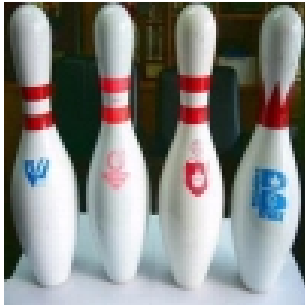

*predicted*

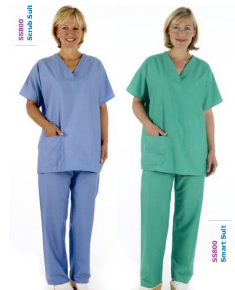

*random control*

nomination

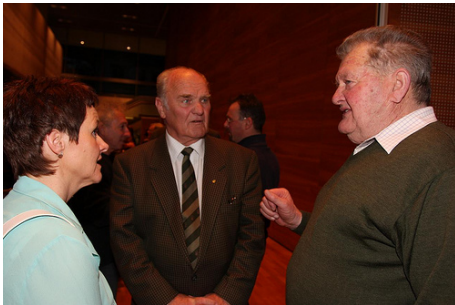

*predicted*

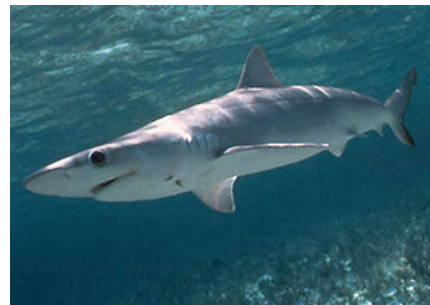

*random control*

grab

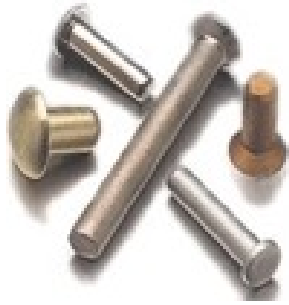

*predicted*

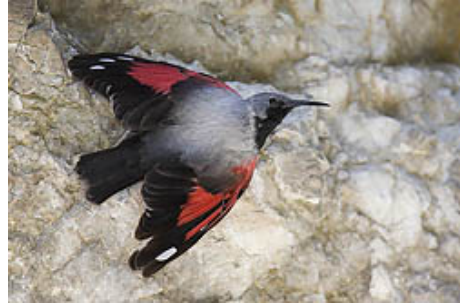

*random control*

chaplain

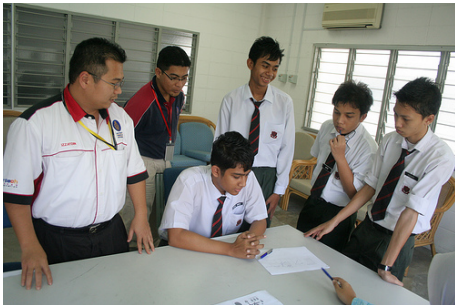

*predicted*

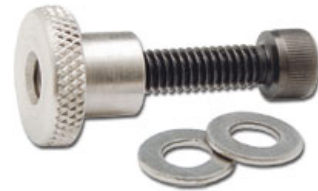

*random control*

cruise

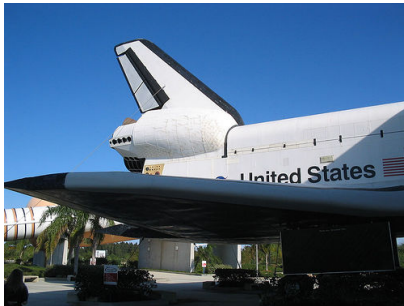

*predicted*

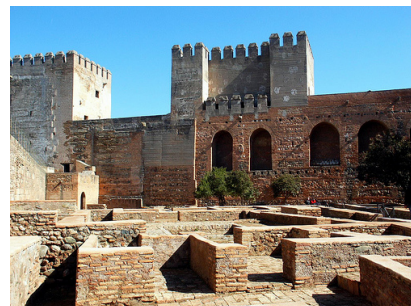

*random control*

burning

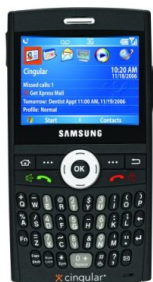

*predicted*

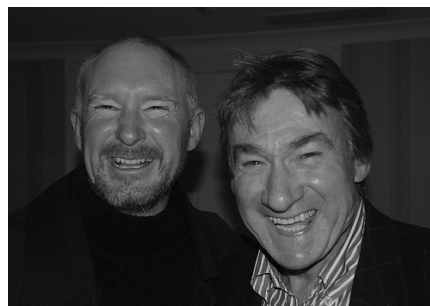

*random control*

brain

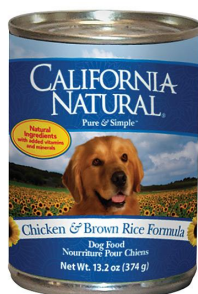

*predicted*

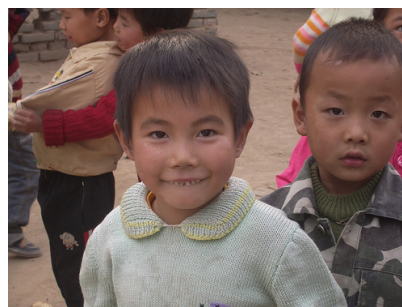

*random control*

sinner

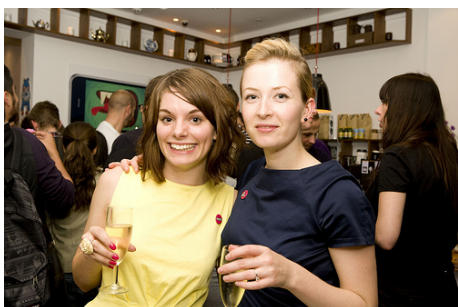

*predicted*

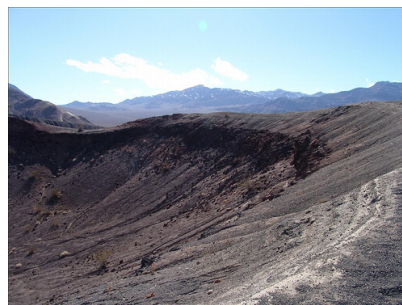

*random control*



goody

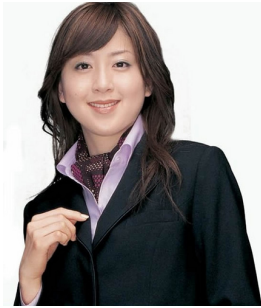

*predicted*

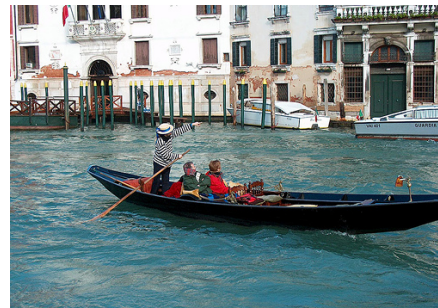

*random control*

barber

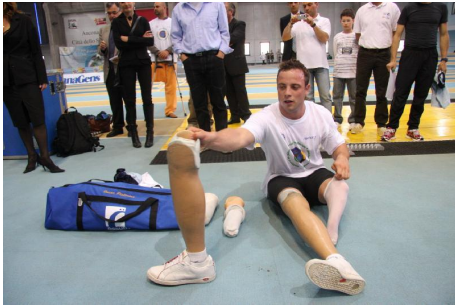

*predicted*

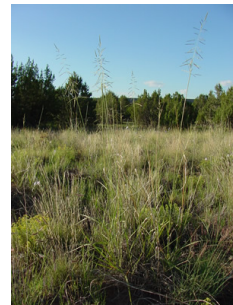

*random control*

republic

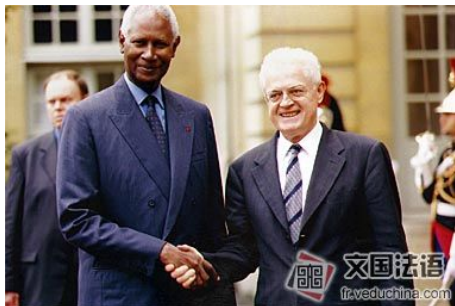

*predicted*

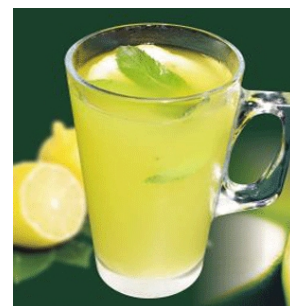

*random control*

tenderness

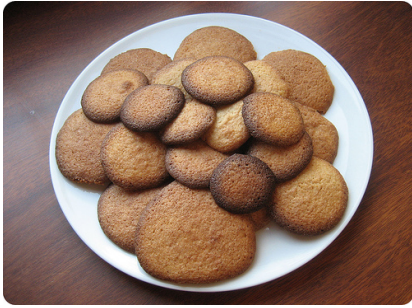

*predicted*

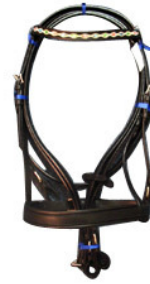

*random control*

bake

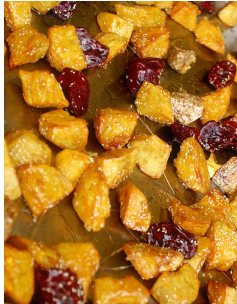

*predicted*

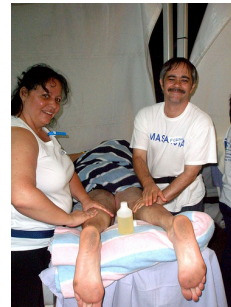

*random control*

dynamite

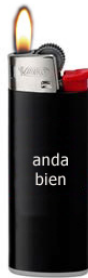

*predicted*

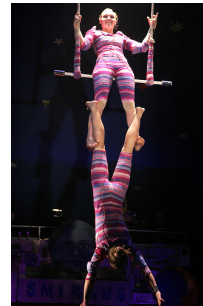

*random control*

**impostor**

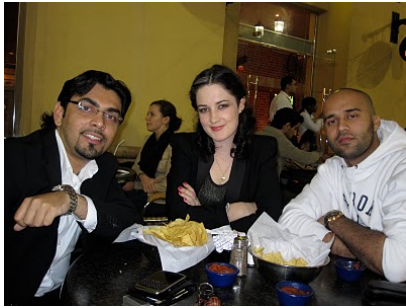

*predicted*

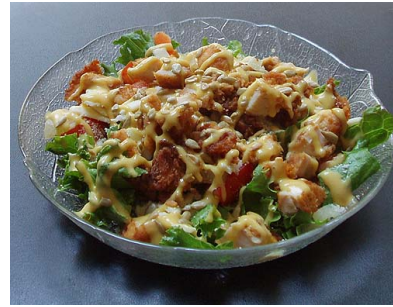

*random control*

**former**

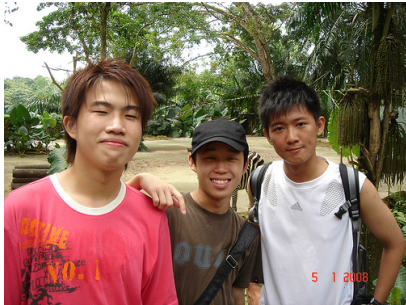

*predicted*

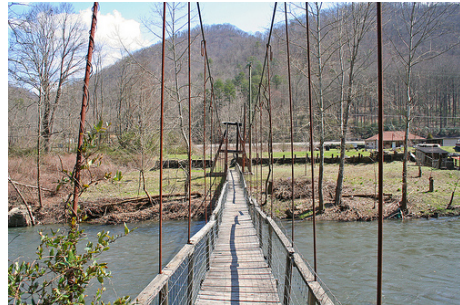

*random control*

**conference**

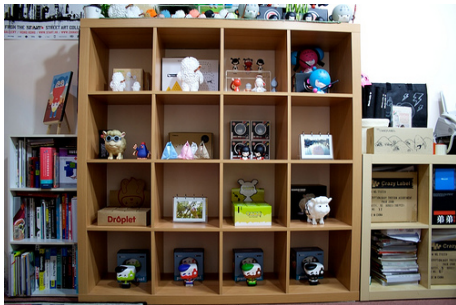

*predicted*

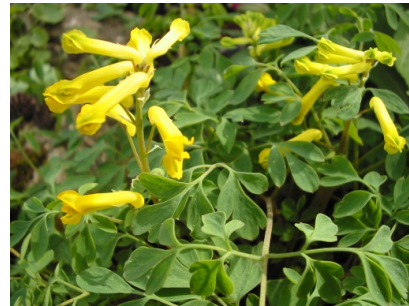

*random control*

textbook

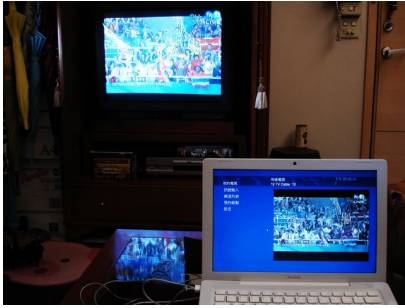

*predicted*

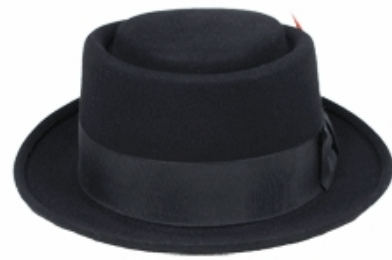

*random control*

curse

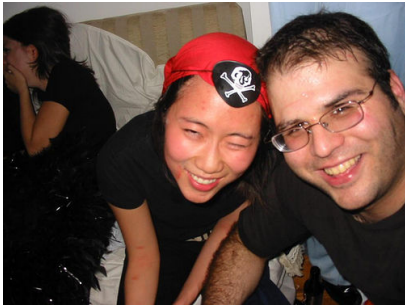

*predicted*

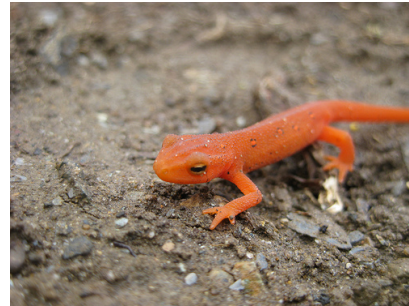

*random control*

navy

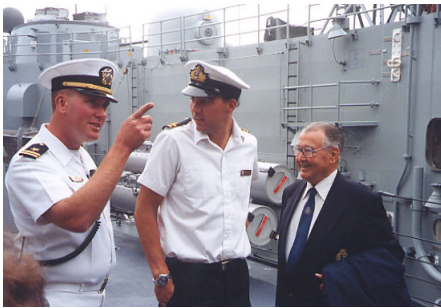

*predicted*

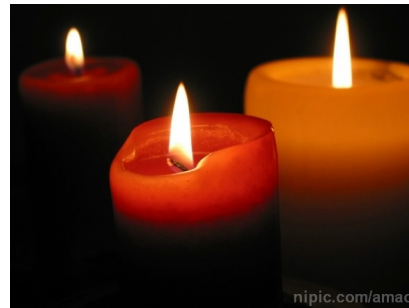

*random control*

loner

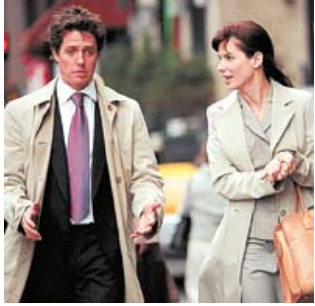

*predicted*

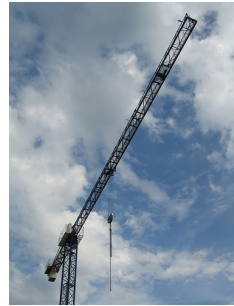

*random control*

sincerity

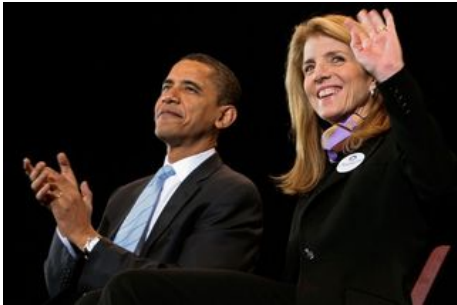

*predicted*

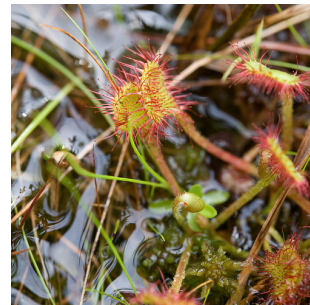

*random control*

poker

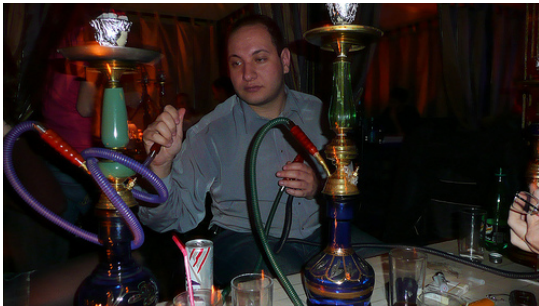

*predicted*

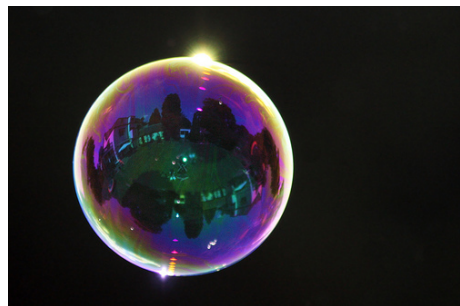

*random control*

clearing

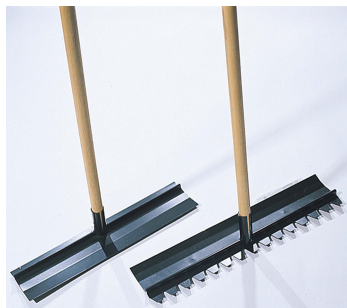

*predicted*

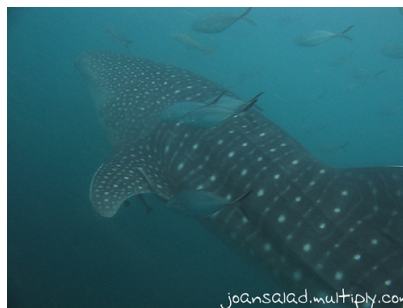

*random control*

revenge

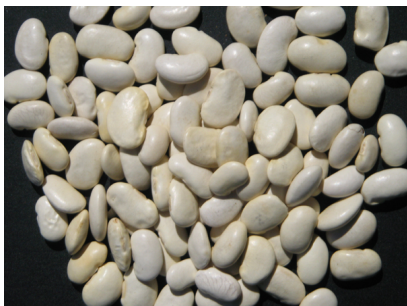

*predicted*

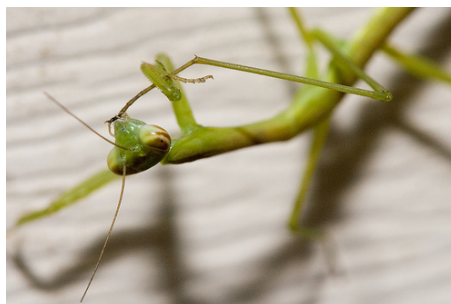

*random control*

ego

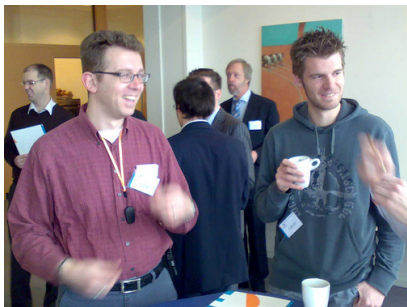

*predicted*

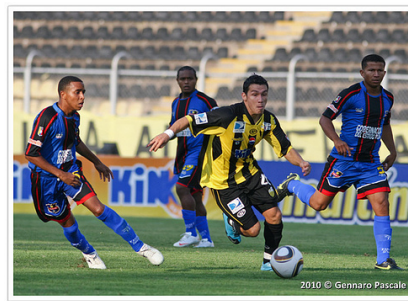

*random control*

triumph

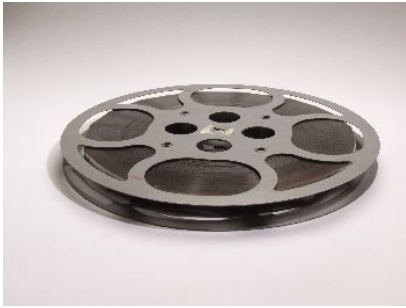

*predicted*

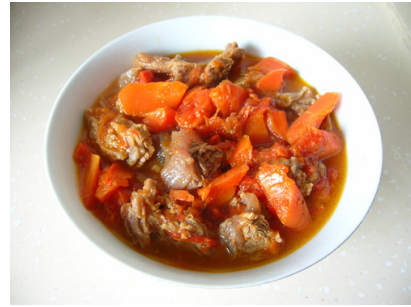

*random control*

hippie

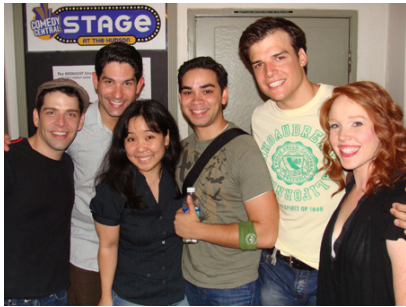

*predicted*

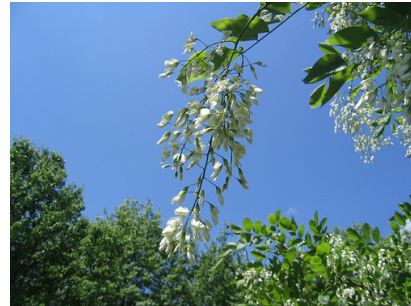

*random control*

charm

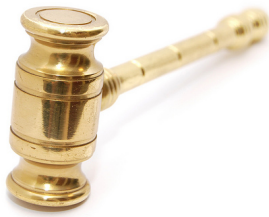

*predicted*

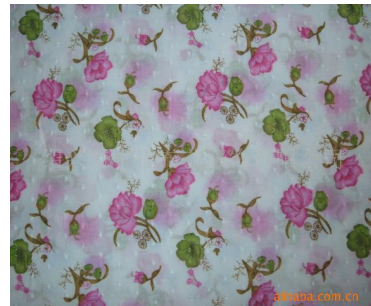

*random control*

bend

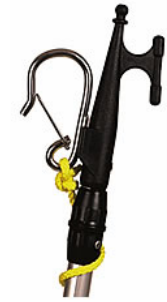

*predicted*

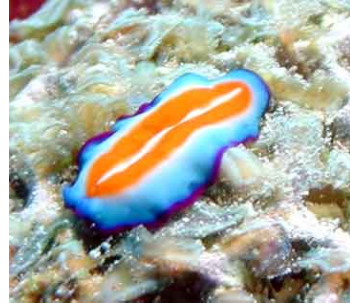

*random control*

negotiation

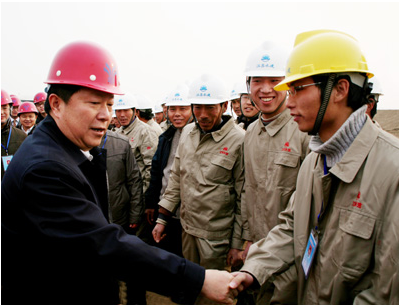

*predicted*

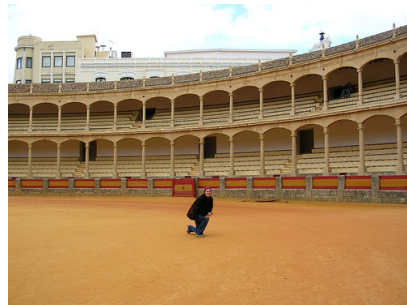

*random control*

liver

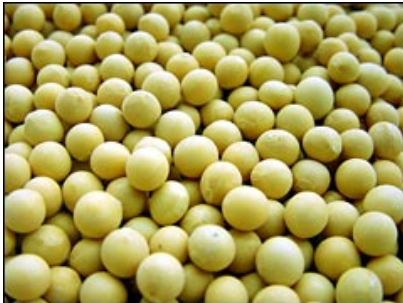

*predicted*

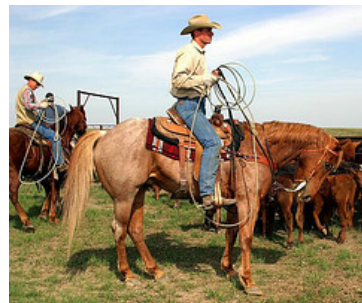

*random control*



angle

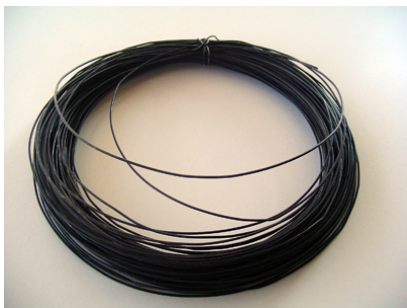

*predicted*

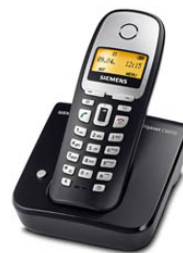

*random control*

cartoon

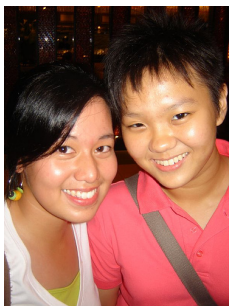

*predicted*

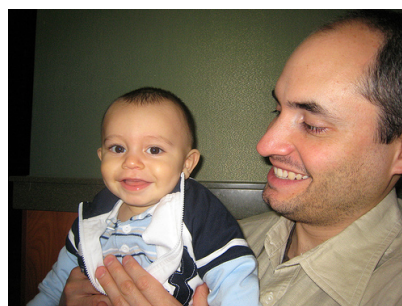

*random control*

shuffle

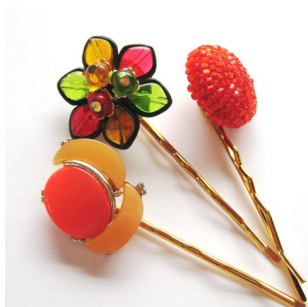

*predicted*

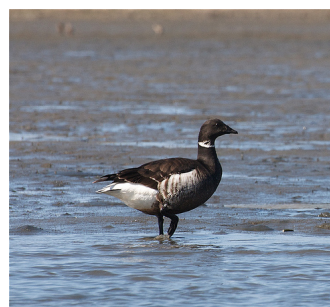

*random control*

goodnight

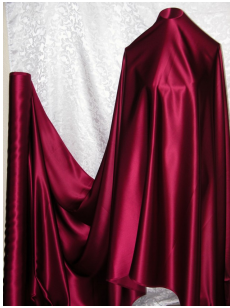

*predicted*

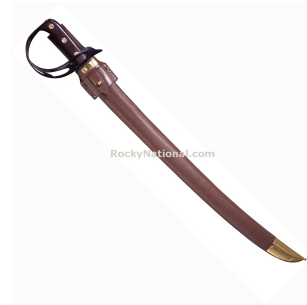

*random control*

hypocrite

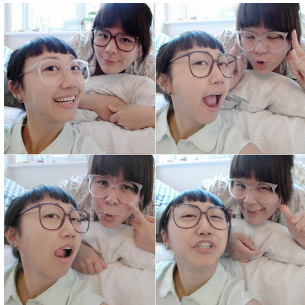

*predicted*

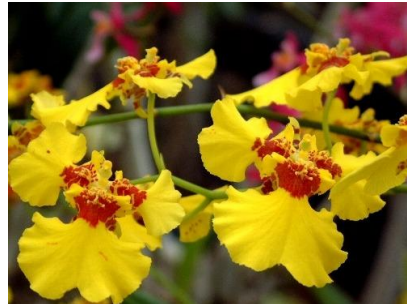

*random control*

fraud

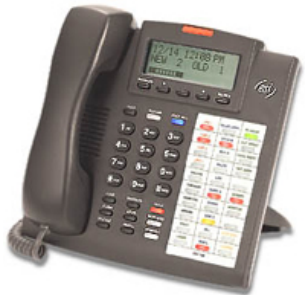

*predicted*

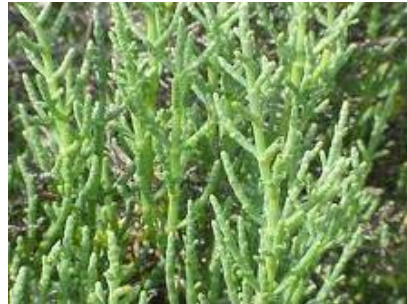

*random control*

temptation

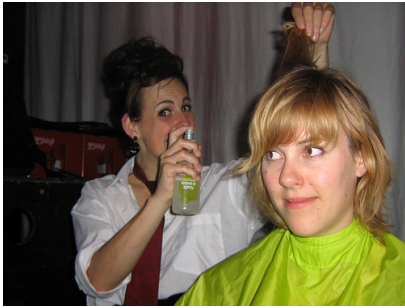

*predicted*

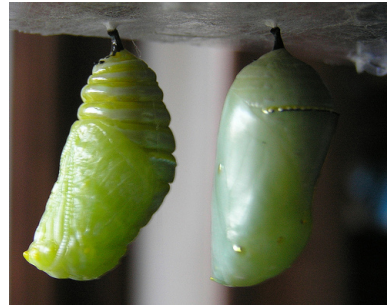

*random control*

haircut

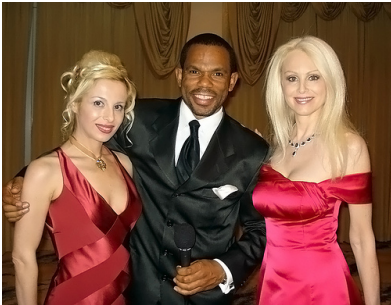

*predicted*

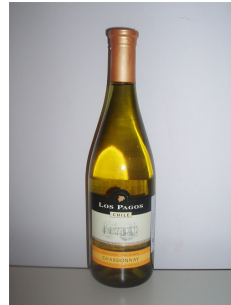

*random control*

grid

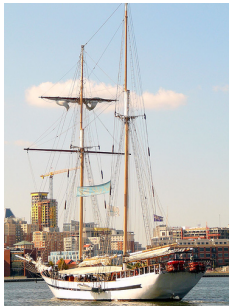

*predicted*

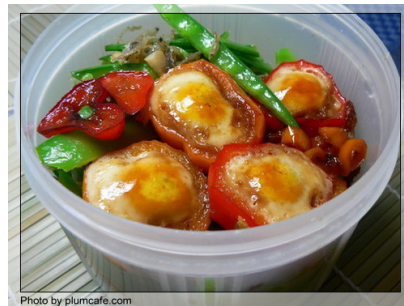

*random control*

cool

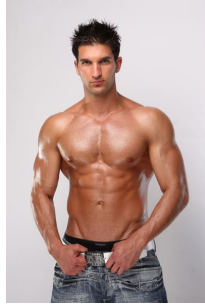

*predicted*

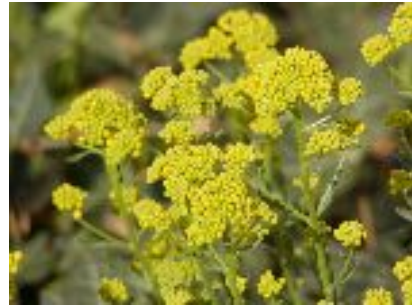

*random control*

autograph

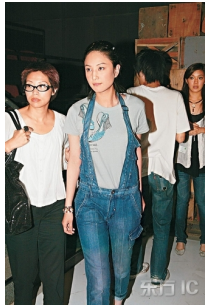

*predicted*

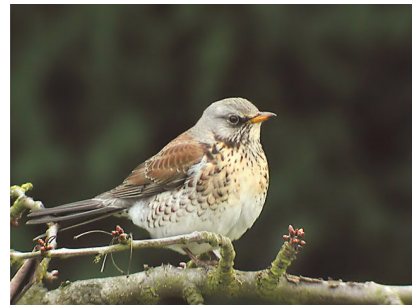

*random control*

affect

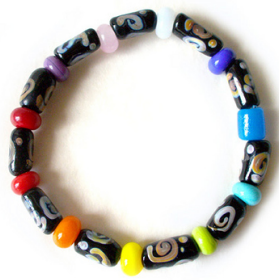

*predicted*

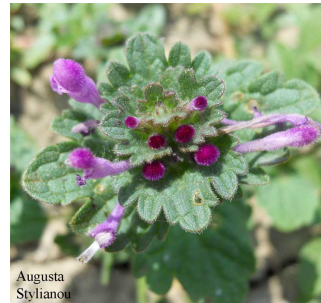

*random control*

**quarter**

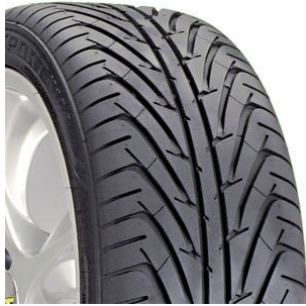

*predicted*

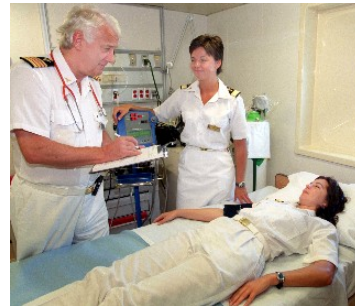

*random control*

**patent**

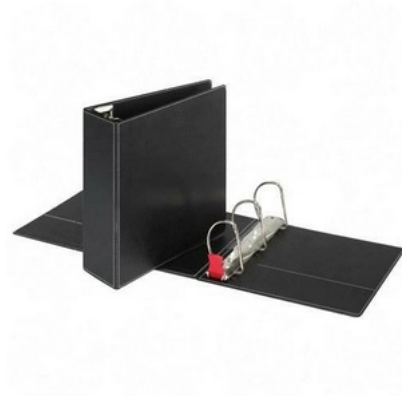

*predicted*

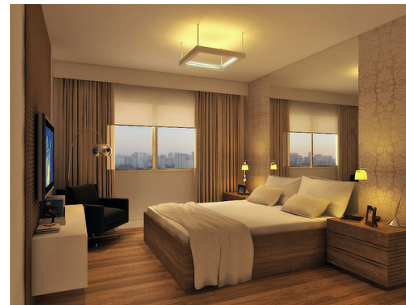

*random control*

**shaman**

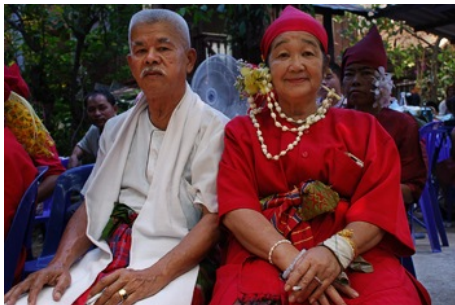

*predicted*

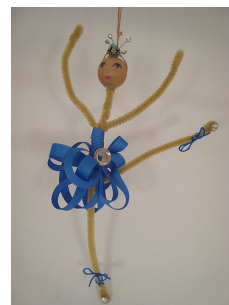

*random control*

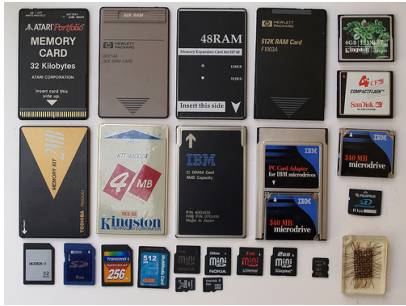

*predicted*

program

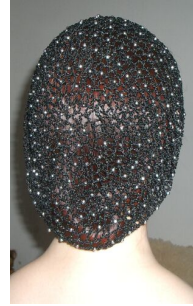

*random control*

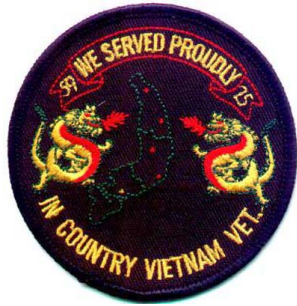

*predicted*

ensure

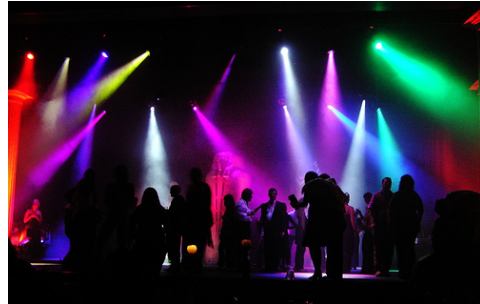

*random control*

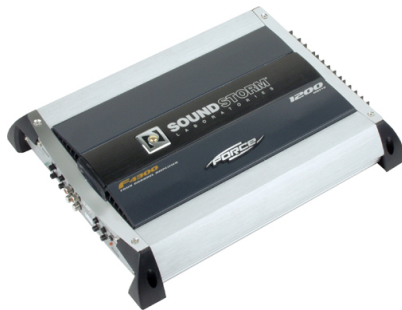

*predicted*

consent

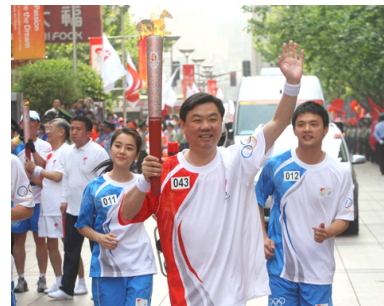

*random control*

hers

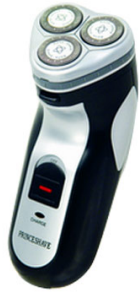

*predicted*

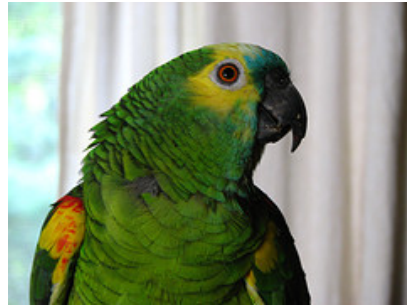

*random control*

werewolf

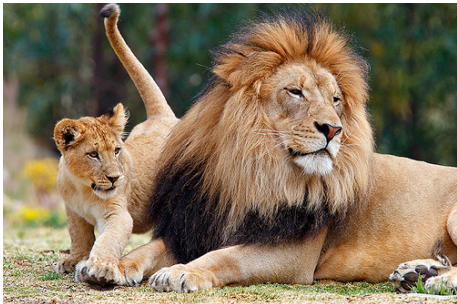

*predicted*

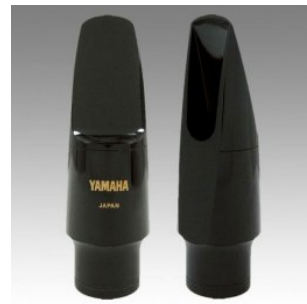

*random control*

ad

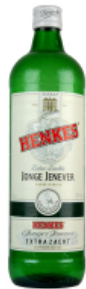

*predicted*

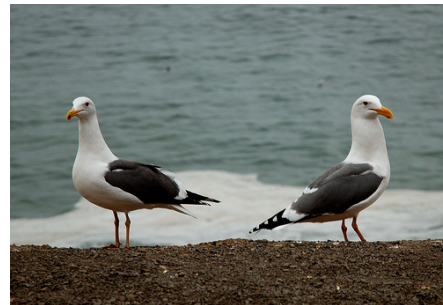

*random control*

size

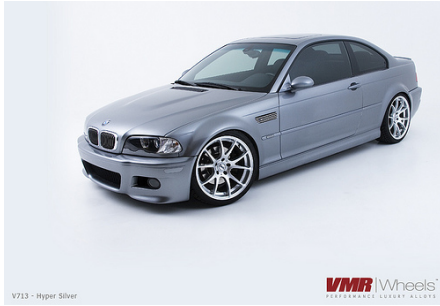

*predicted*

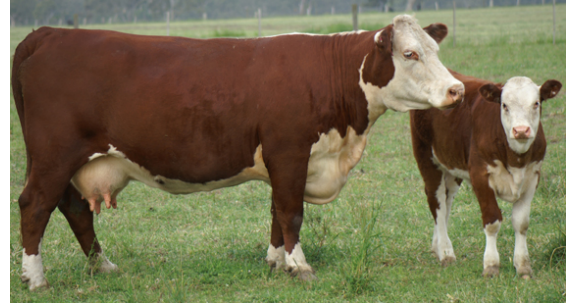

*random control*

zen

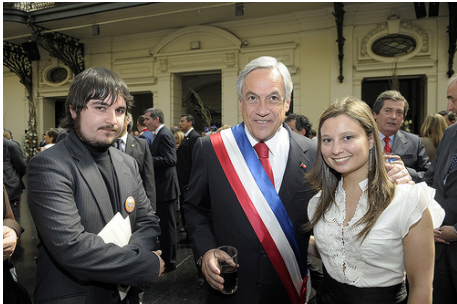

*predicted*

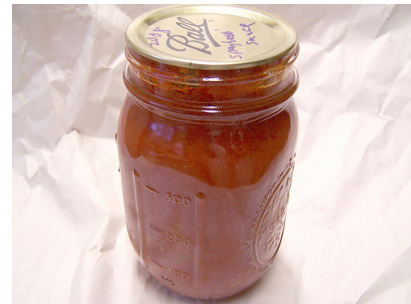

*random control*

currency

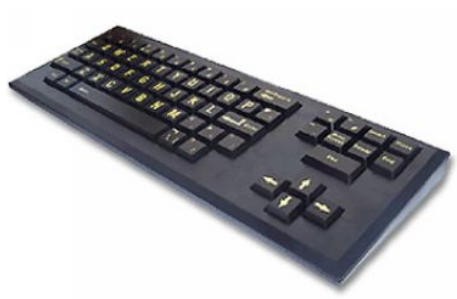

*predicted*

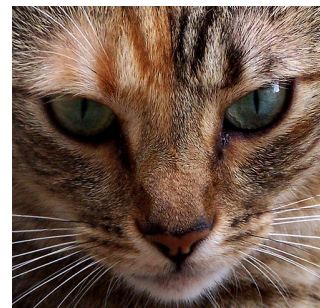

*random control*



sheriff

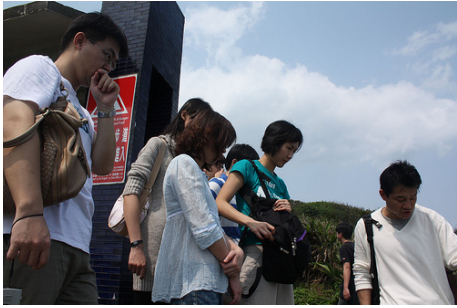

*predicted*

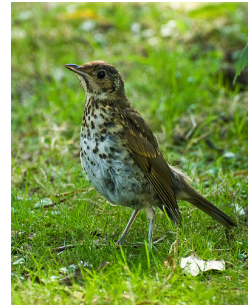

*random control*

playboy

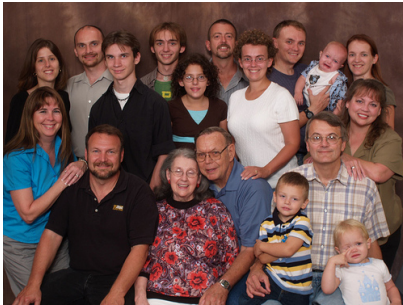

*predicted*

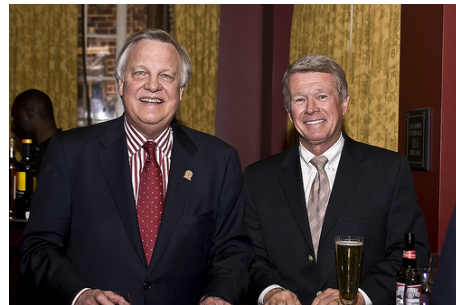

*random control*

calendar

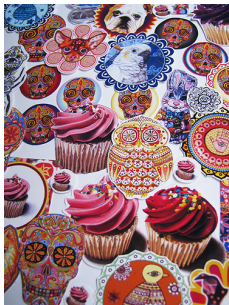

*predicted*

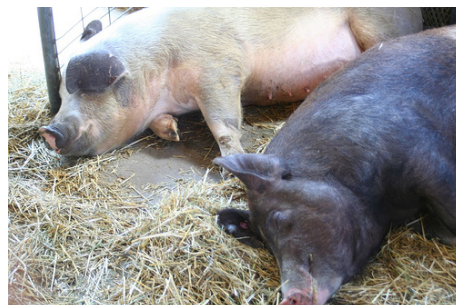

*random control*

yours

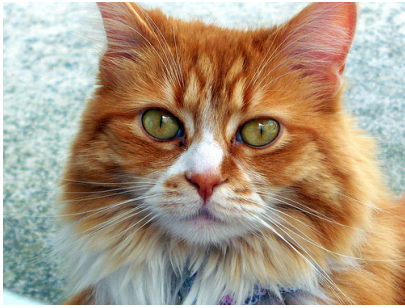

*predicted*

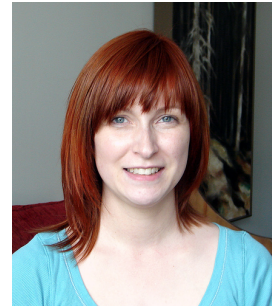

*random control*

role

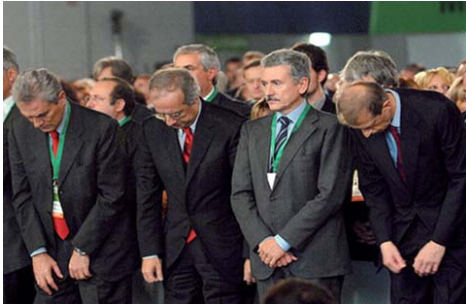

*predicted*

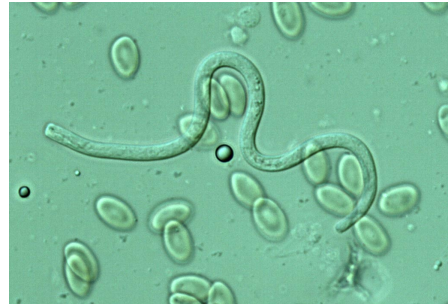

*random control*

letter

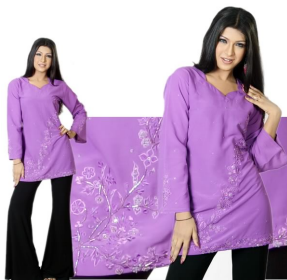

*predicted*

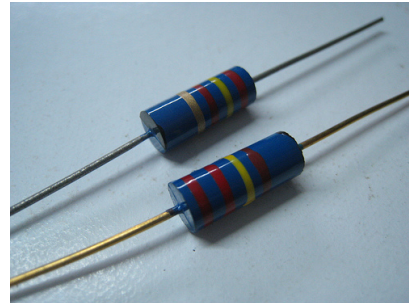

*random control*

countryside

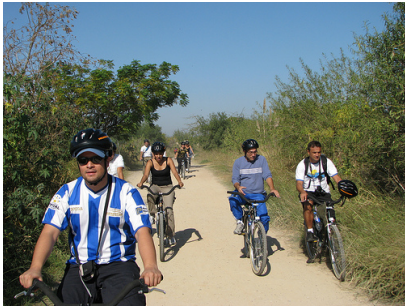

*predicted*

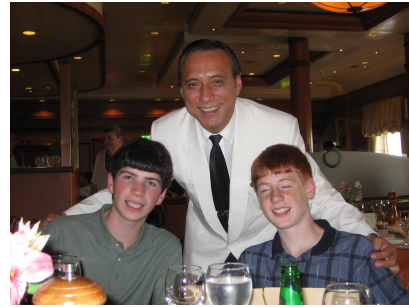

*random control*

pressure

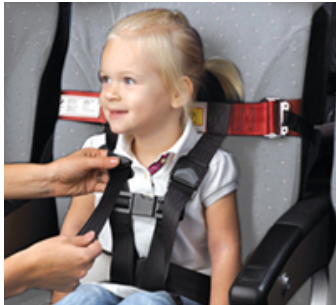

*predicted*

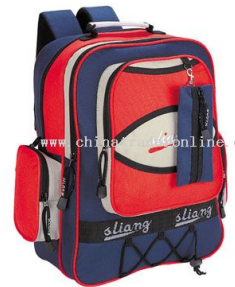

*random control*

overdose

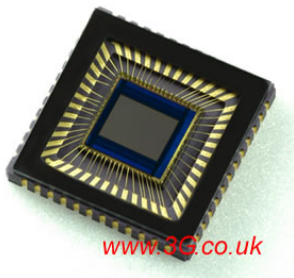

*predicted*

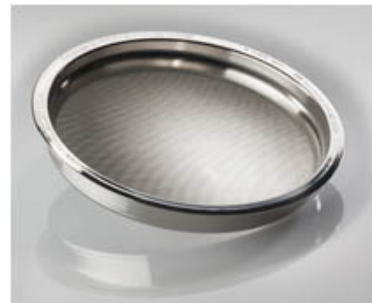

*random control*

archives

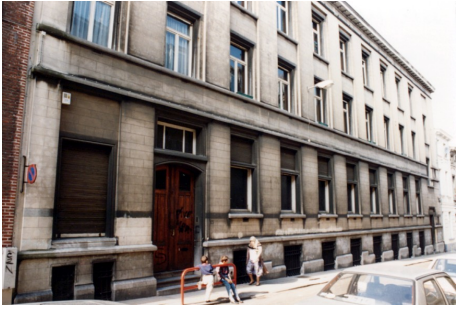

*predicted*

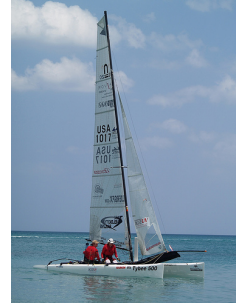

*random control*

muslim

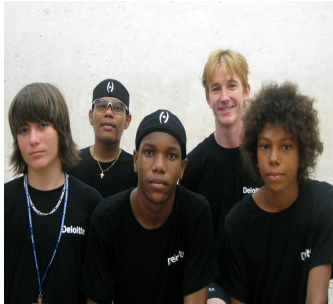

*predicted*

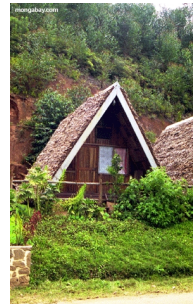

*random control*

backup

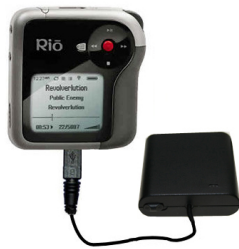

*predicted*

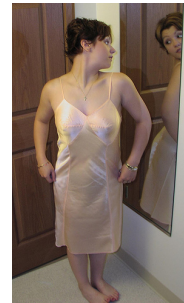

*random control*

lab

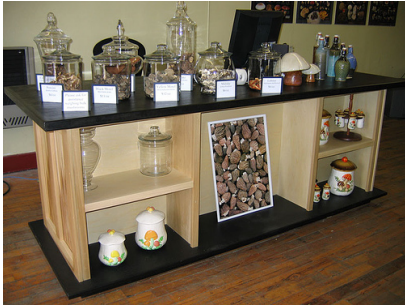

*predicted*

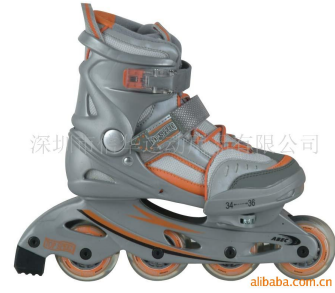

*random control*

nasal

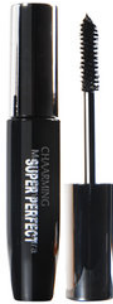

*predicted*

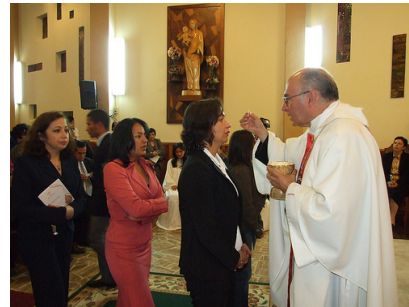

*random control*

specialty

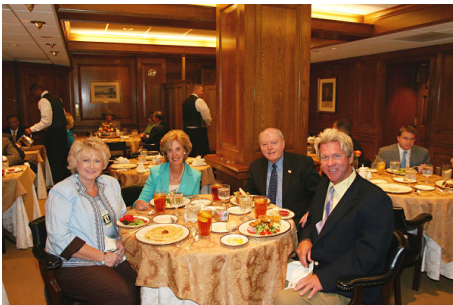

*predicted*

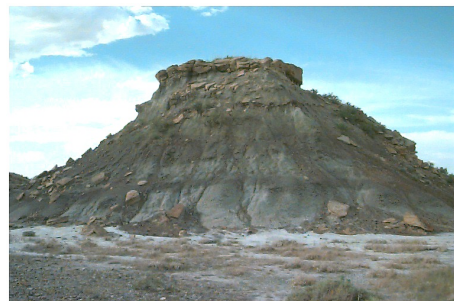

*random control*

laughter

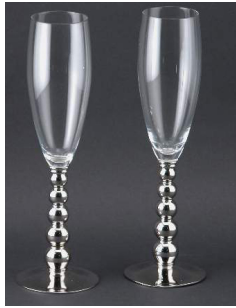

*predicted*

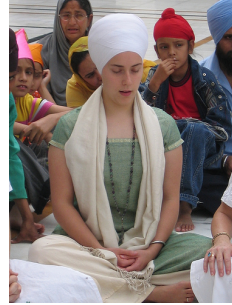

*random control*

pitching

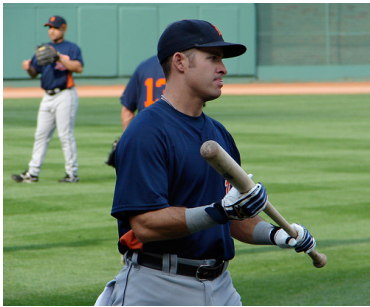

*predicted*

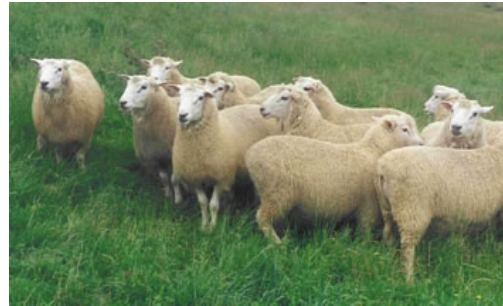

*random control*

graduating

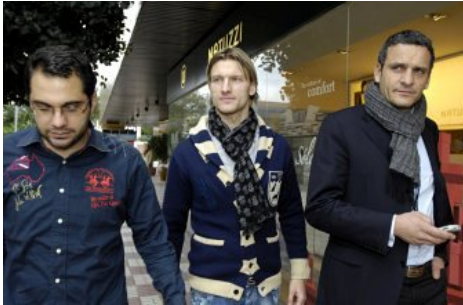

*predicted*

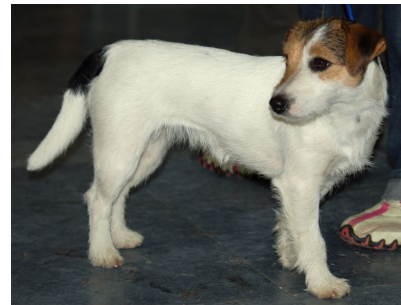

*random control*

debut

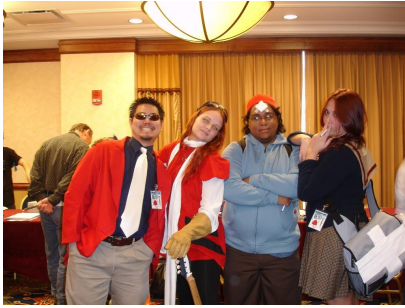

*predicted*

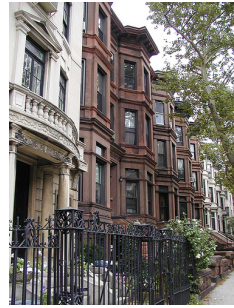

*random control*

faithful

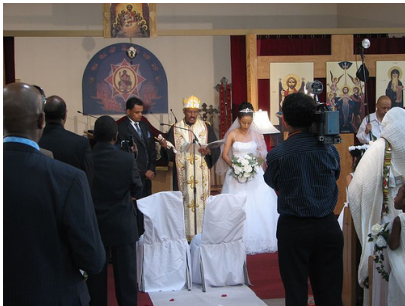

*predicted*

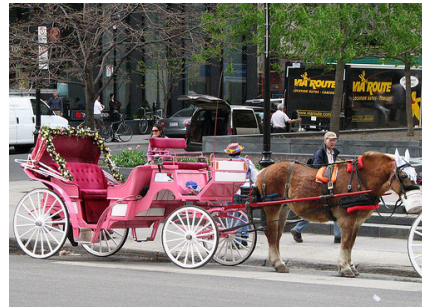

*random control*

herd

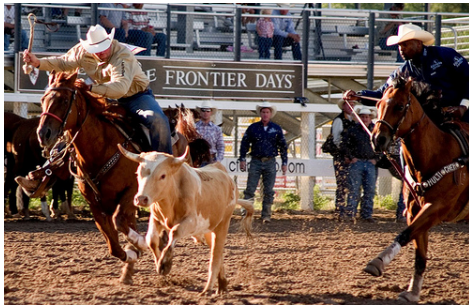

*predicted*

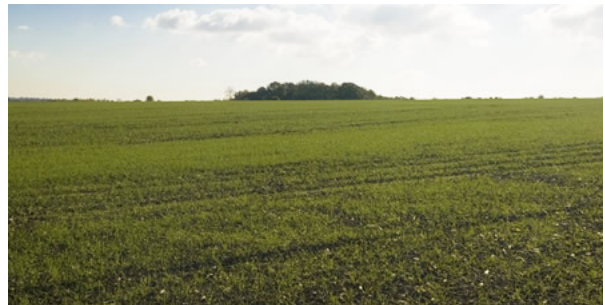

*random control*

eligible

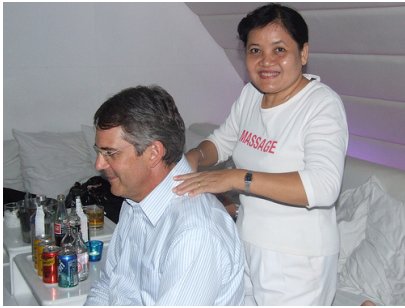

*predicted*

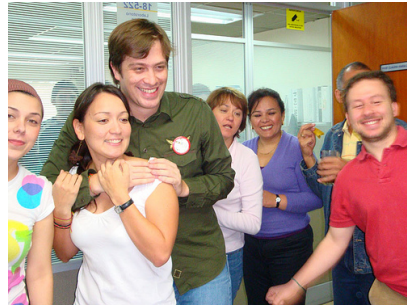

*random control*

following

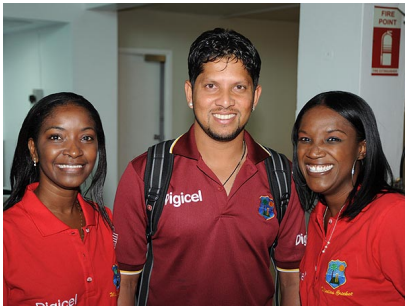

*predicted*

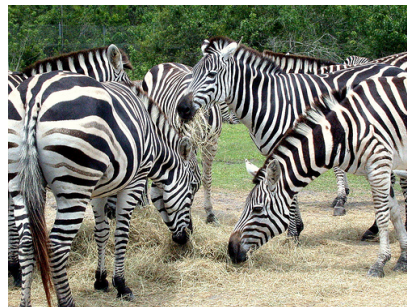

*random control*

consumer

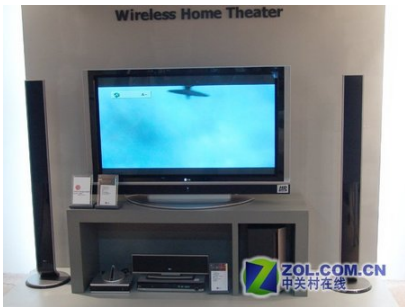

*predicted*

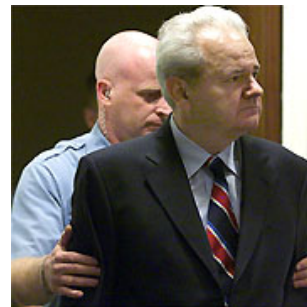

*random control*



receipt

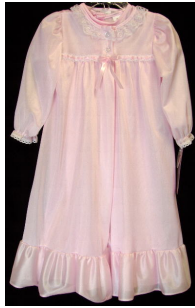

*predicted*

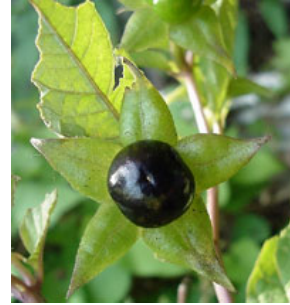

*random control*

analyst

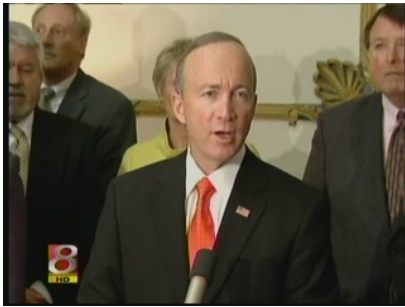

*predicted*

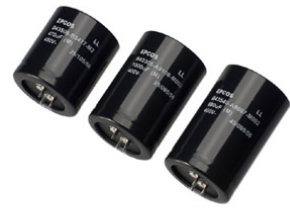

*random control*

soap

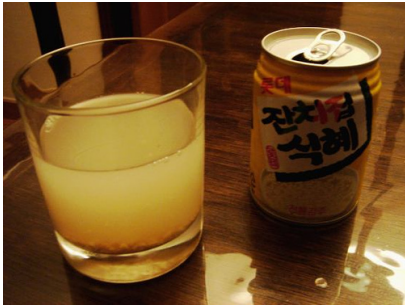

*predicted*

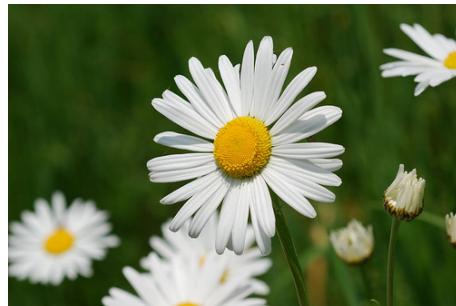

*random control*

solo

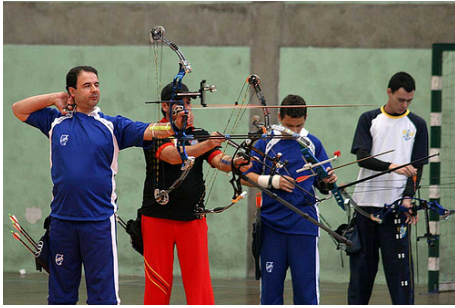

*predicted*

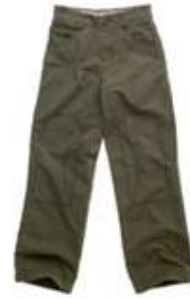

*random control*

favorite

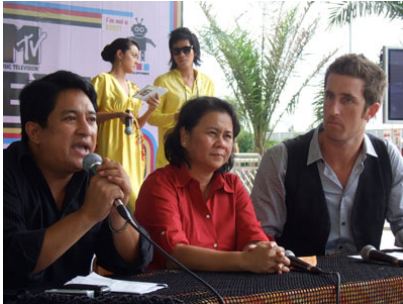

*predicted*

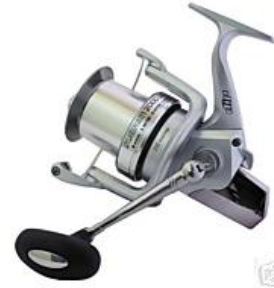

*random control*

starboard

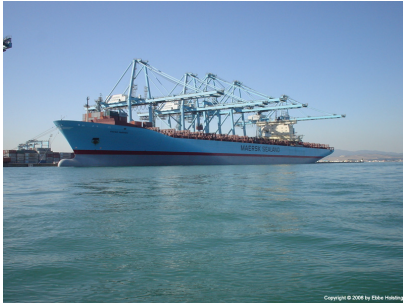

*predicted*

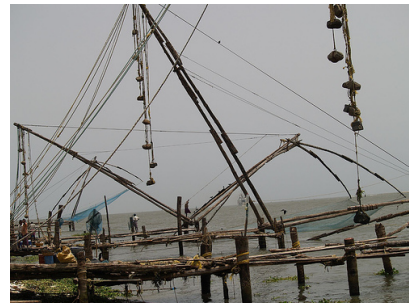

*random control*

echo

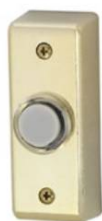

*predicted*

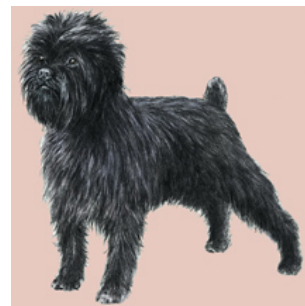

*random control*

extortion

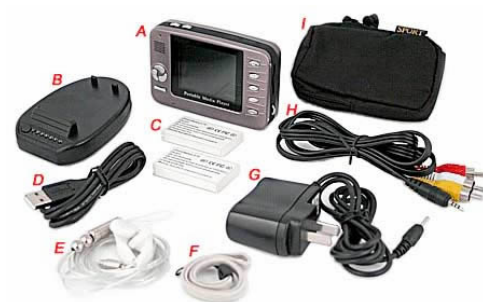

*predicted*

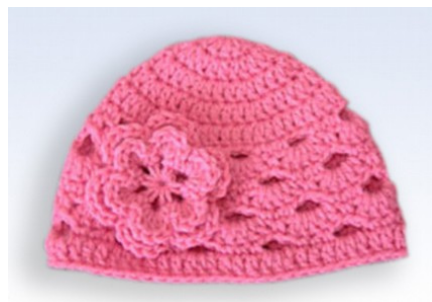

*random control*

microphone

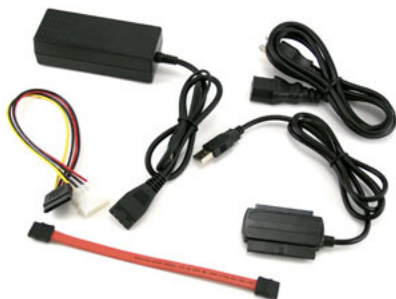

*predicted*

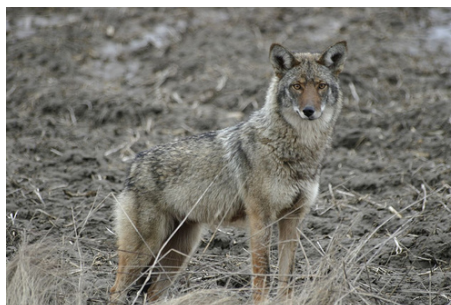

*random control*

sympathy

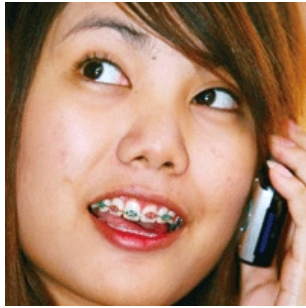

*predicted*

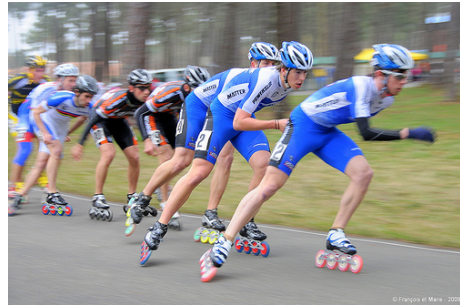

*random control*

visual

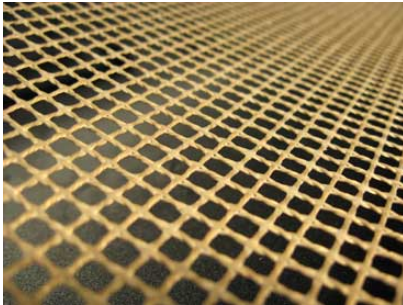

*predicted*

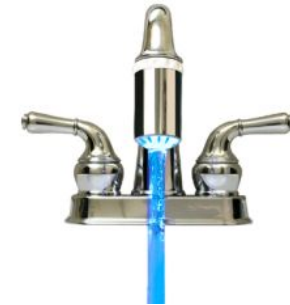

*random control*

design

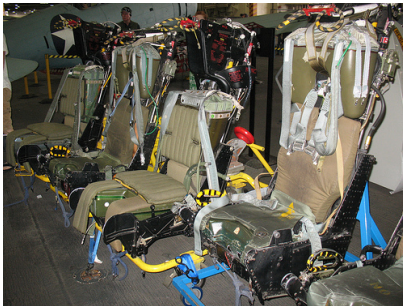

*predicted*

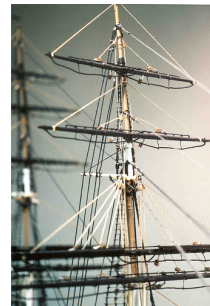

*random control*

**concern**

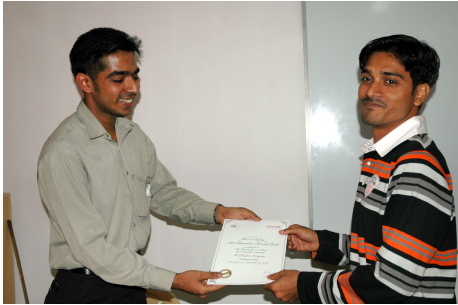

*predicted*

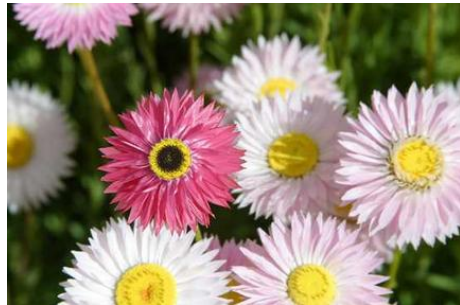

*random control*

**universe**

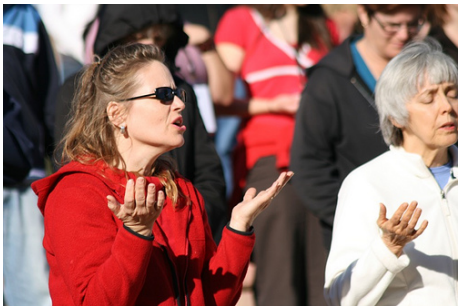

*predicted*

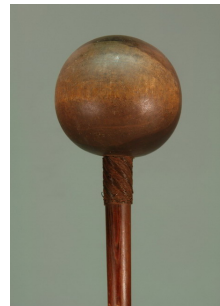

*random control*

**lust**

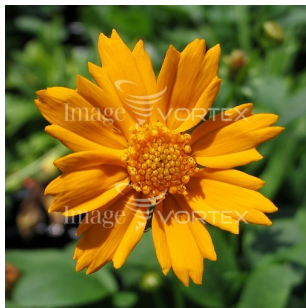

*predicted*

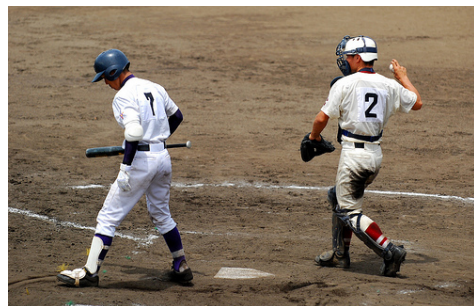

*random control*

par

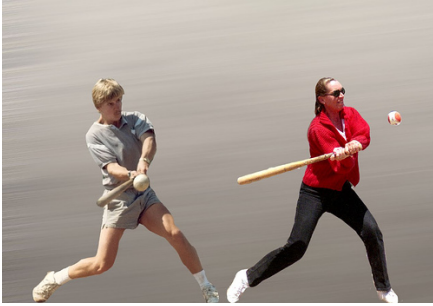

*predicted*

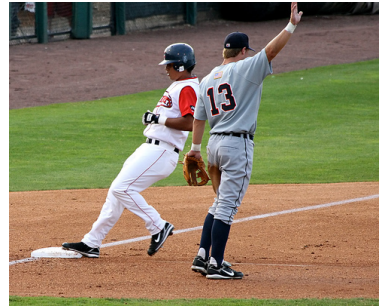

*random control*

mood

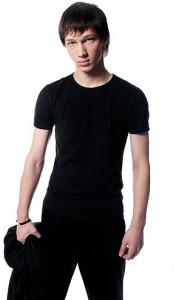

*predicted*

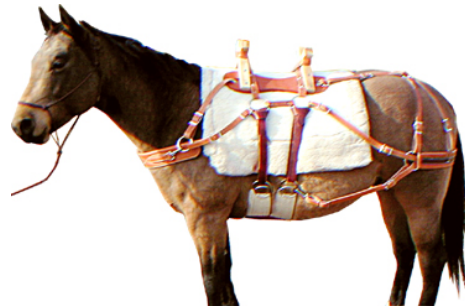

*random control*

terminal

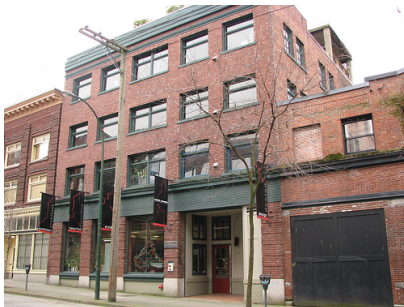

*predicted*

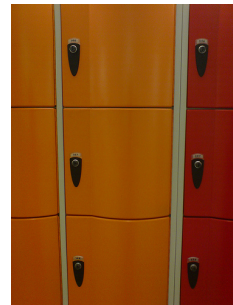

*random control*

diploma

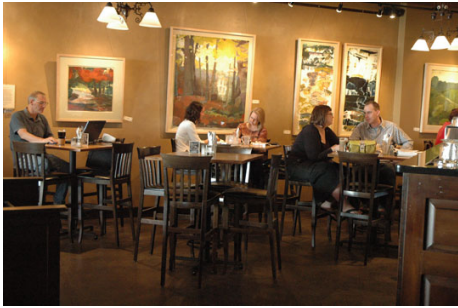

*predicted*

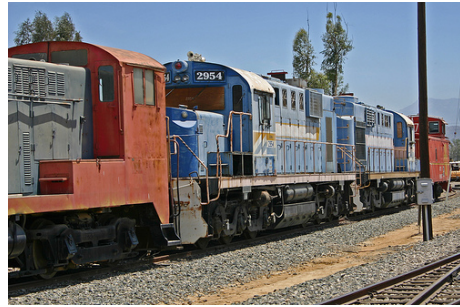

*random control*

performance

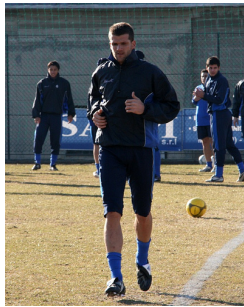

*predicted*

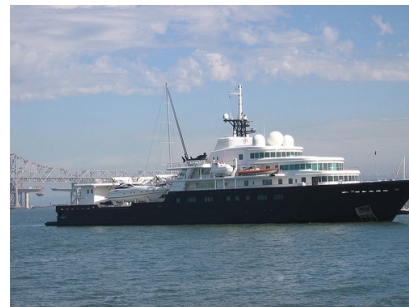

*random control*

chief

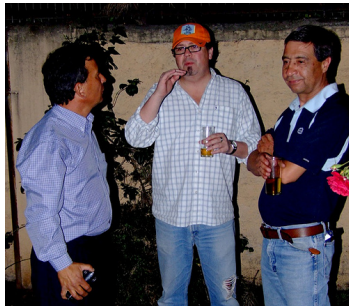

*predicted*

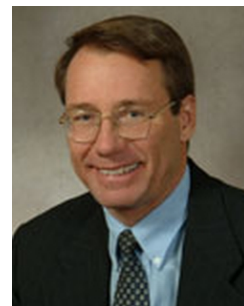

*random control*

meeting

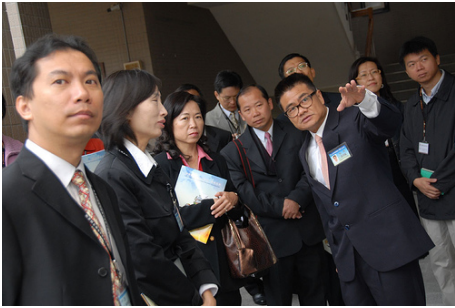

*predicted*

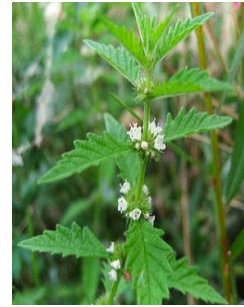

*random control*

commercial

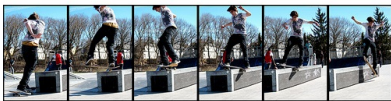

*predicted*

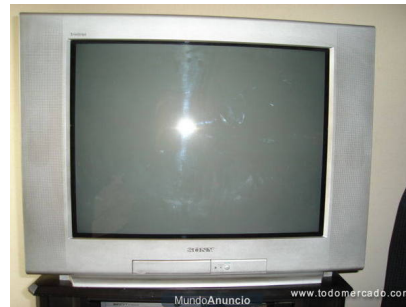

*random control*

teen

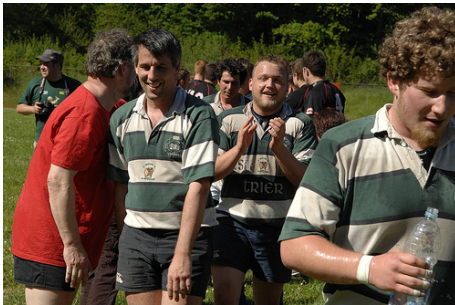

*predicted*

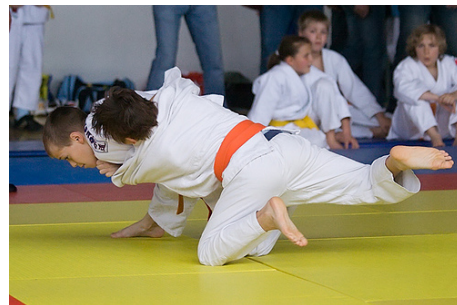

*random control*



**sorrow**

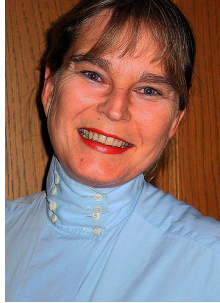

*predicted*

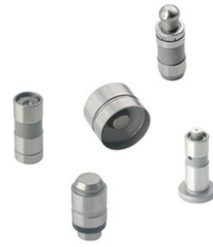

*random control*

**headache**

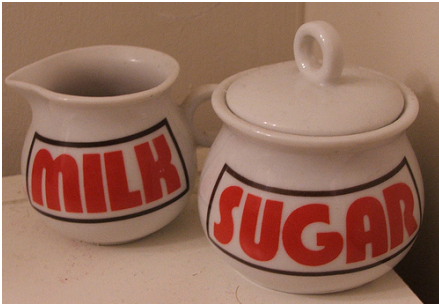

*predicted*

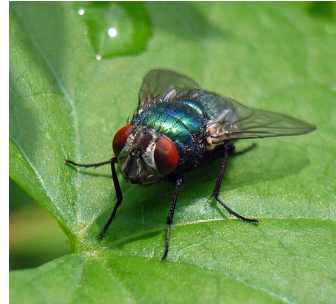

*random control*

**capacity**

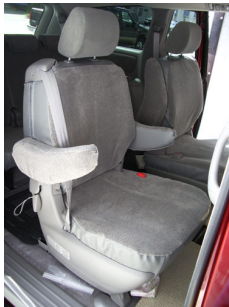

*predicted*

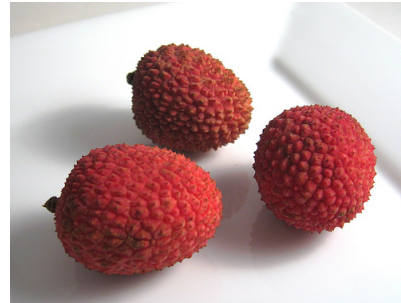

*random control*

**mining**

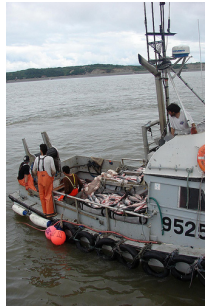

*predicted*

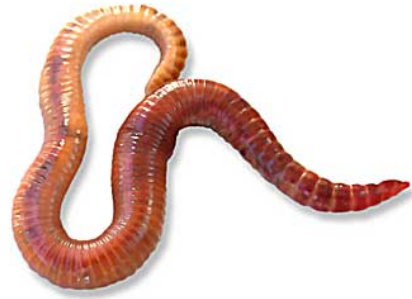

*random control*

**belle**

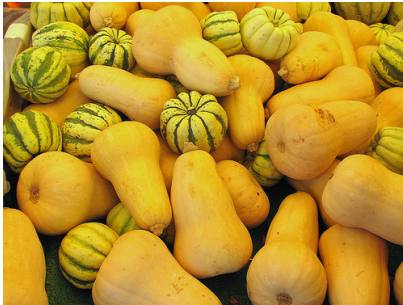

*predicted*

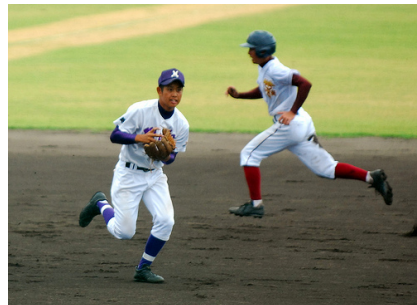

*random control*

**immortal**

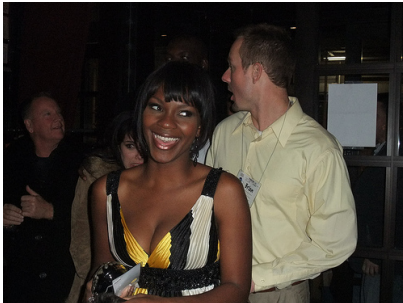

*predicted*

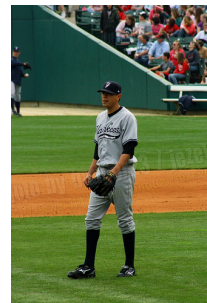

*random control*

goodwill

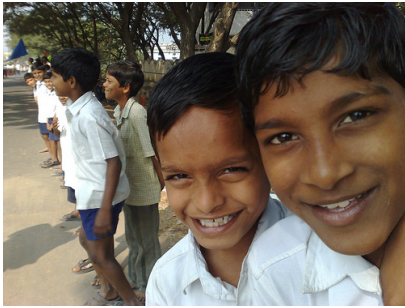

*predicted*

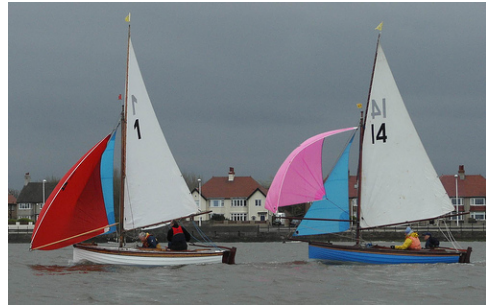

*random control*

organic

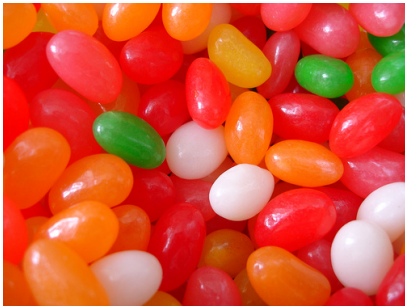

*predicted*

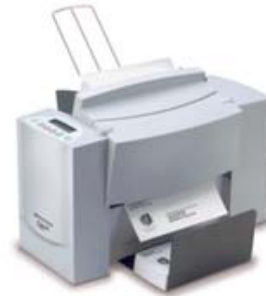

*random control*

slam

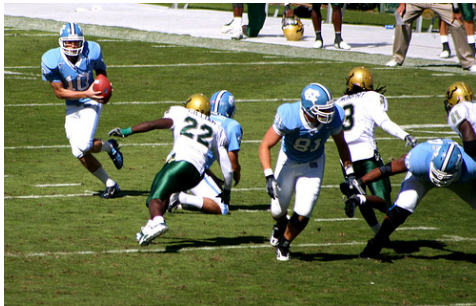

*predicted*

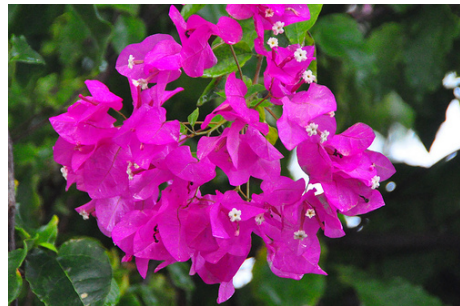

*random control*

**dwarf**

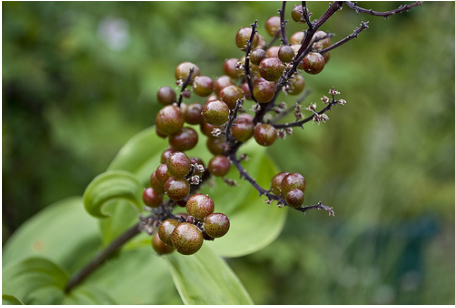

*predicted*

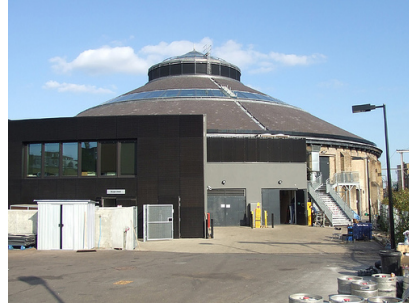

*random control*

**pint**

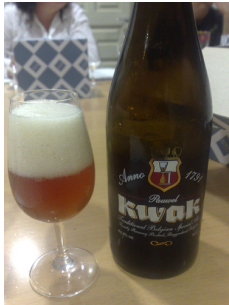

*predicted*

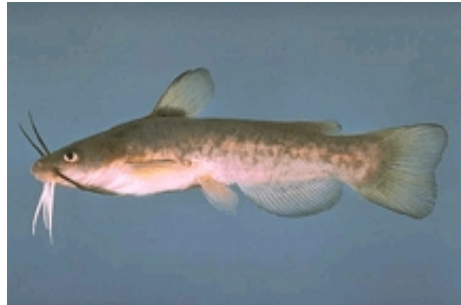

*random control*

**rub**

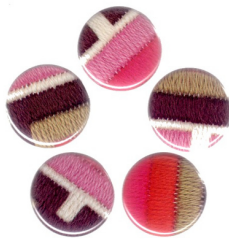

*predicted*

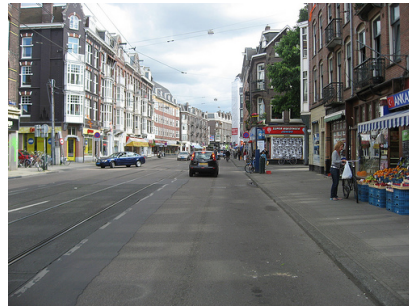

*random control*

chauffeur

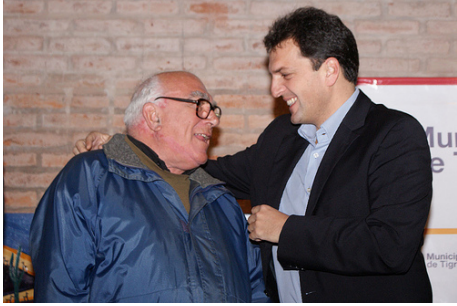

*predicted*

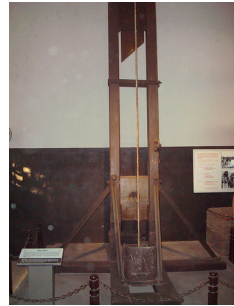

*random control*

original

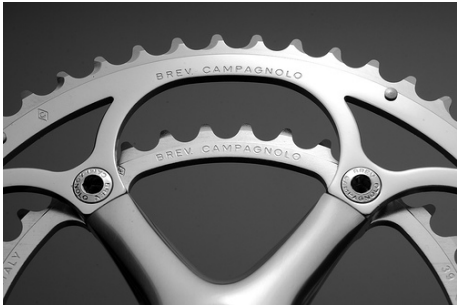

*predicted*

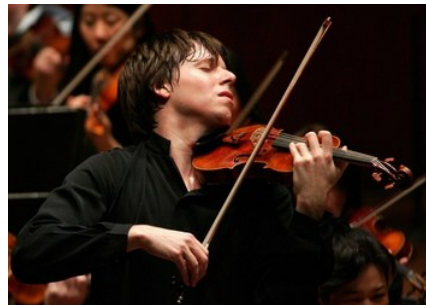

*random control*

nickname

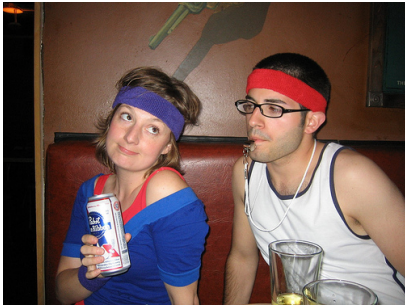

*predicted*

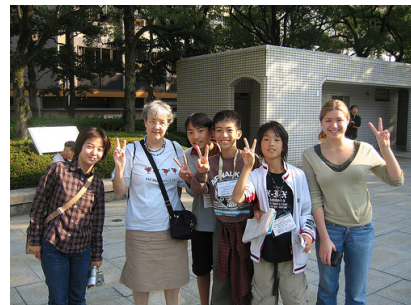

*random control*

equation

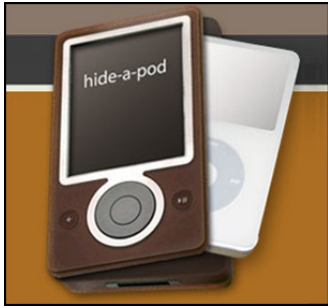

*predicted*

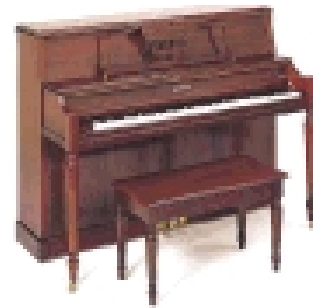

*random control*

report

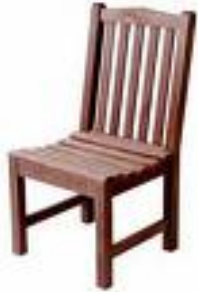

*predicted*

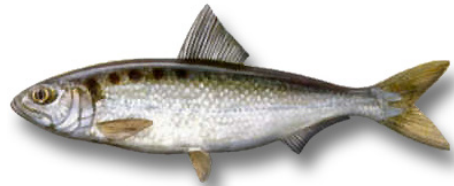

*Aloea fallax nilotica*

*random control*

loser

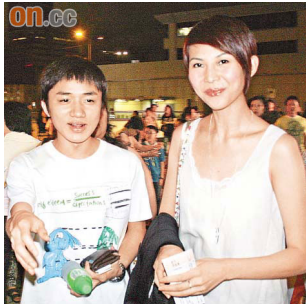

*predicted*

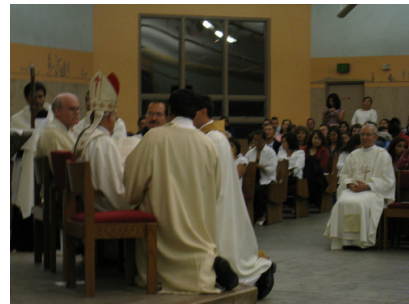

*random control*

**funk**

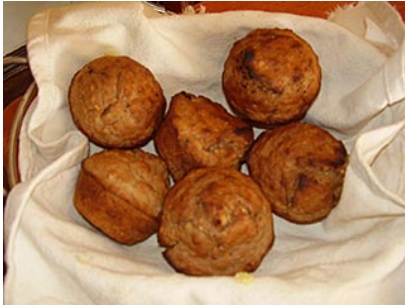

*predicted*

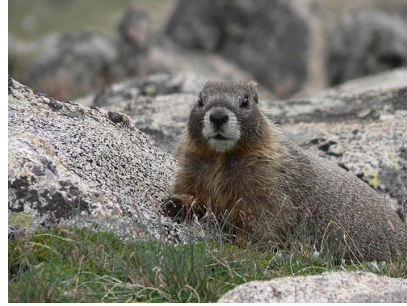

*random control*

**version**

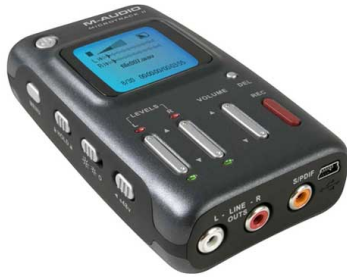

*predicted*

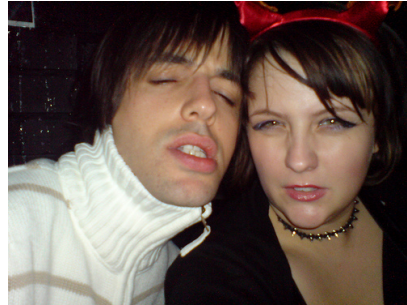

*random control*

**commerce**

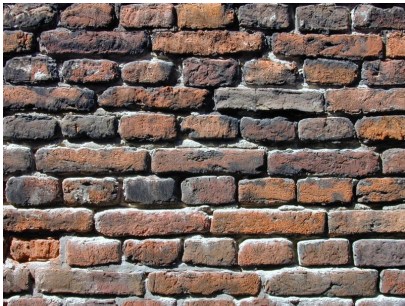

*predicted*

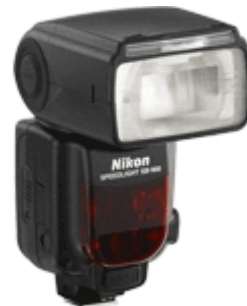

*random control*

mayhem

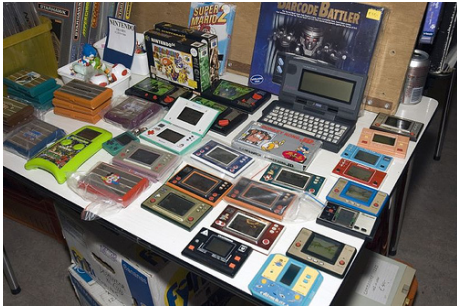

*predicted*

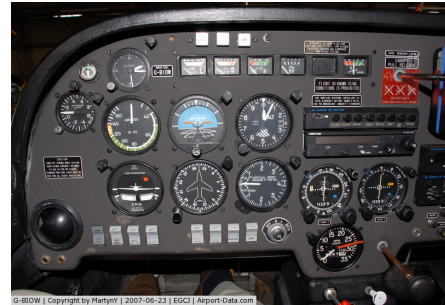

*random control*

technique

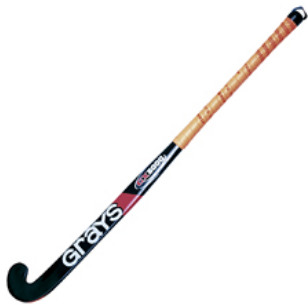

*predicted*

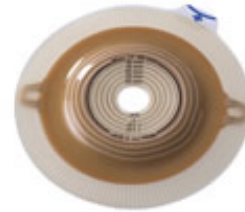

*random control*

yourselves

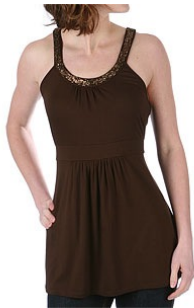

*predicted*

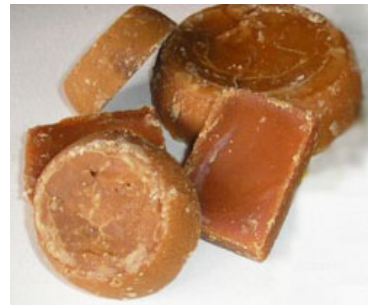

*random control*



slash

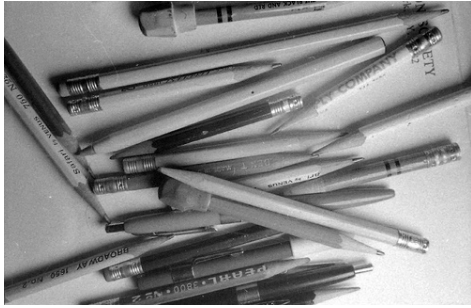

*predicted*

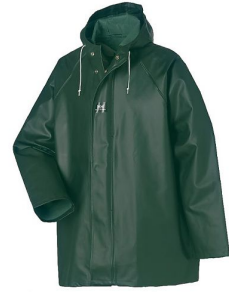

*random control*

correspondence

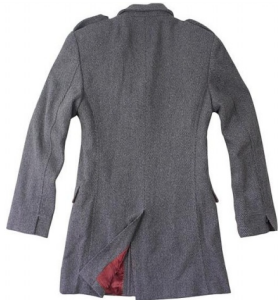

*predicted*

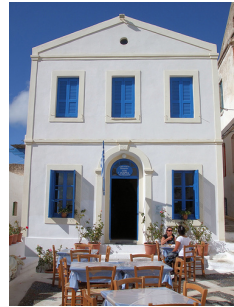

*random control*

behavior

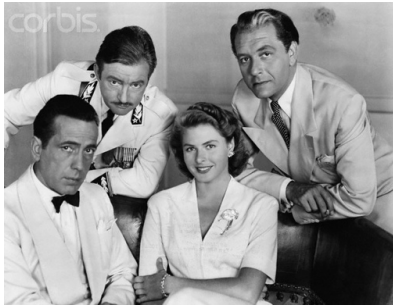

*predicted*

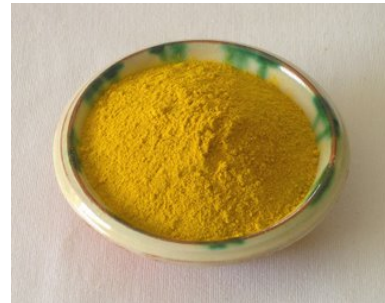

*random control*

**flock**

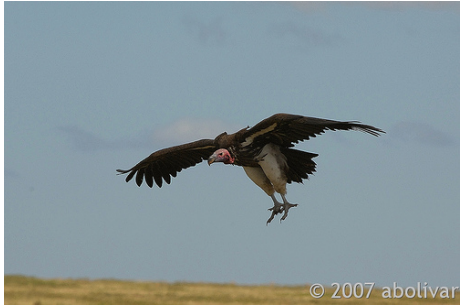

*predicted*

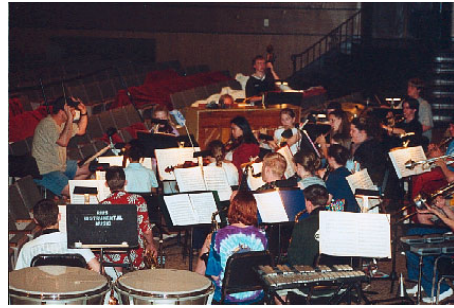

*random control*

**mischief**

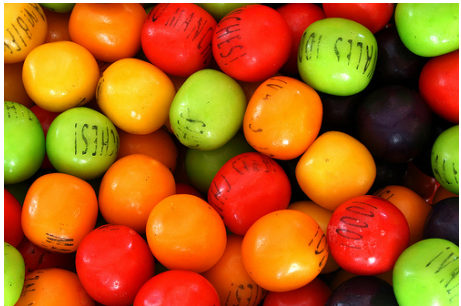

*predicted*

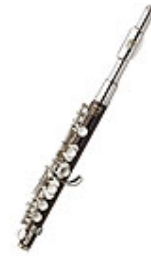

*random control*

**basis**

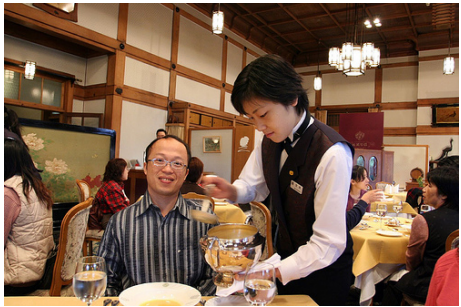

*predicted*

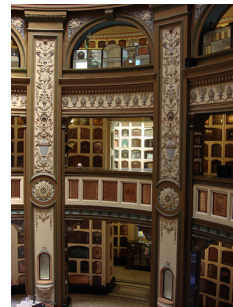

*random control*

blossom

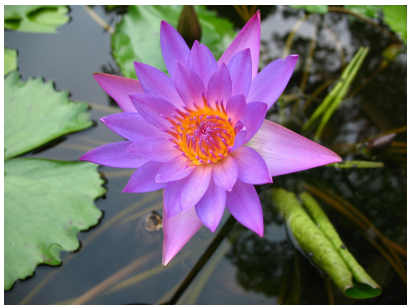

*predicted*

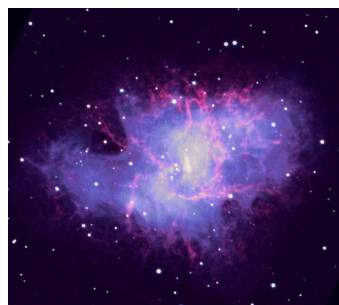

*random control*

cannot

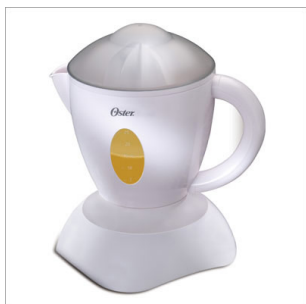

*predicted*

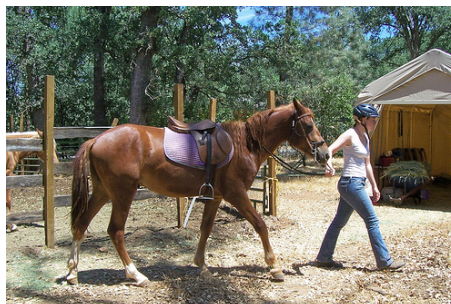

*random control*

nod

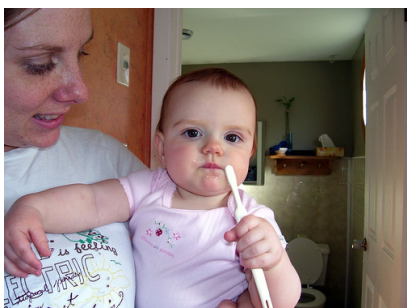

*predicted*

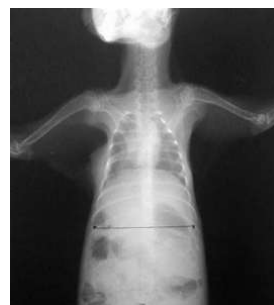

*random control*

**fright**

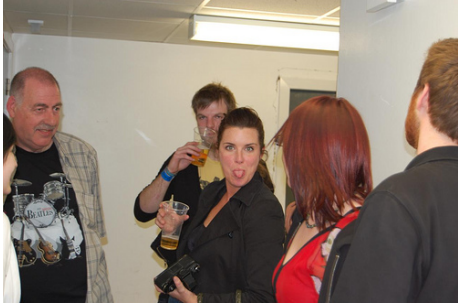

*predicted*

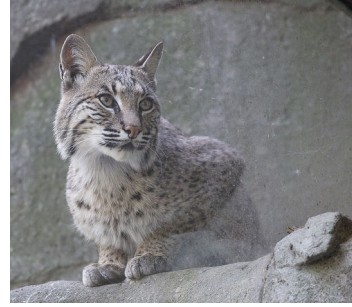

*random control*

**ugh**

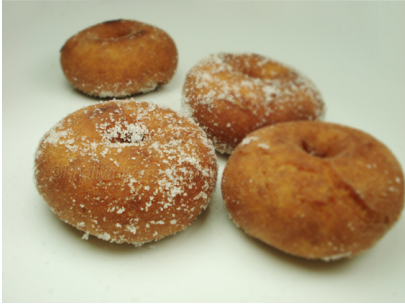

*predicted*

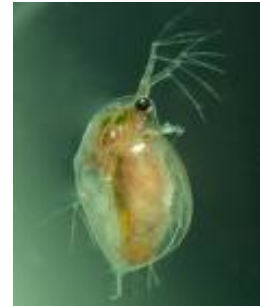

*random control*

**accidental**

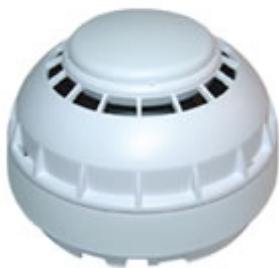

*predicted*

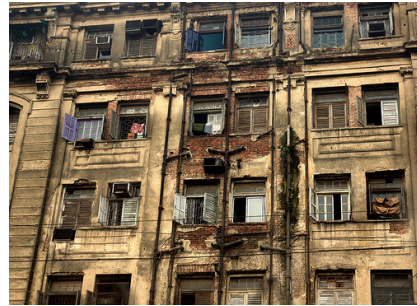

*random control*

employment

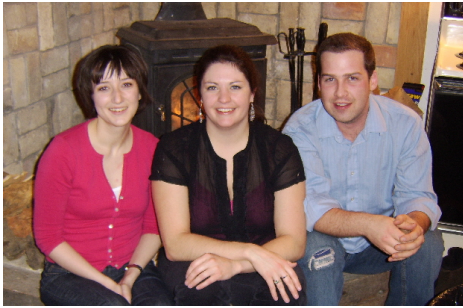

*predicted*

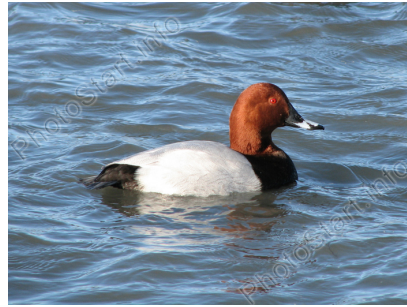

*random control*

petition

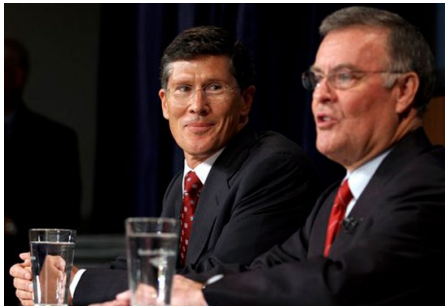

*predicted*

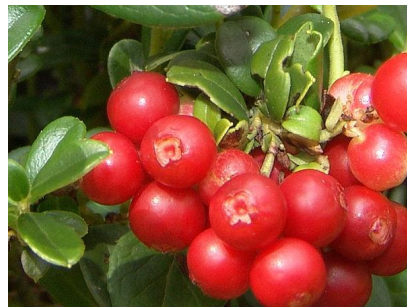

*random control*

history

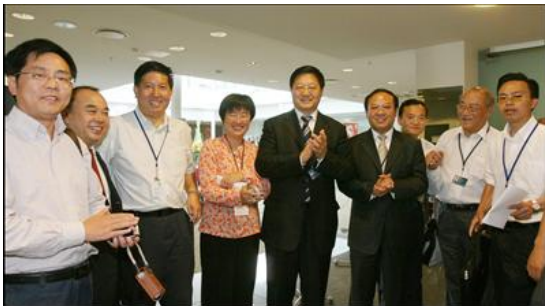

*predicted*

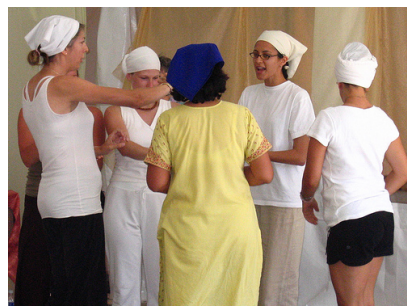

*random control*

simple

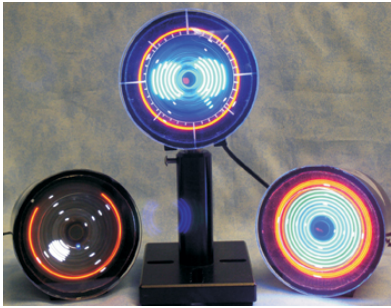

*predicted*

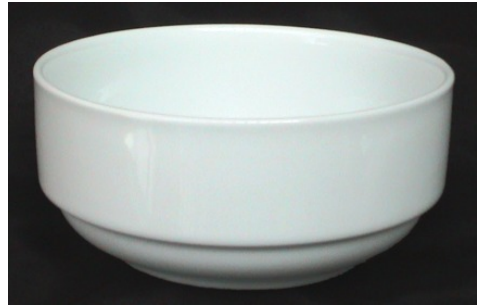

*random control*

mythology

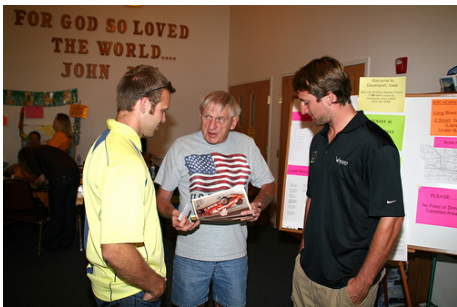

*predicted*

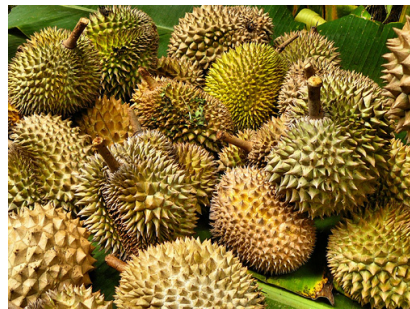

*random control*

percentage

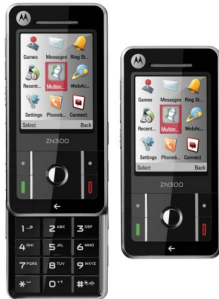

*predicted*

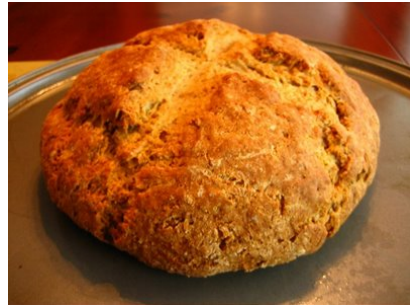

*random control*

undress

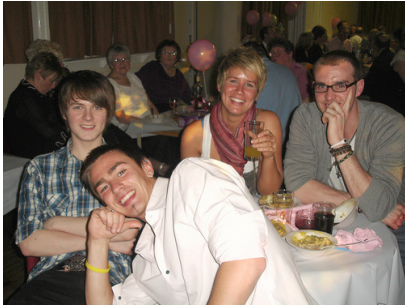

*predicted*

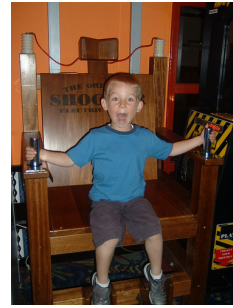

*random control*

weekend

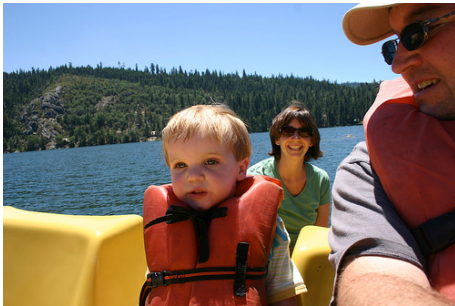

*predicted*

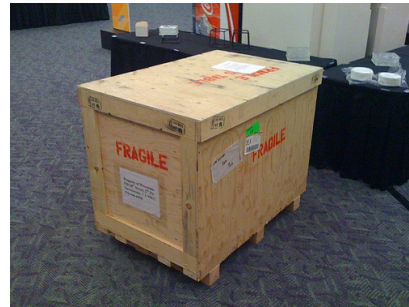

*random control*

morgue

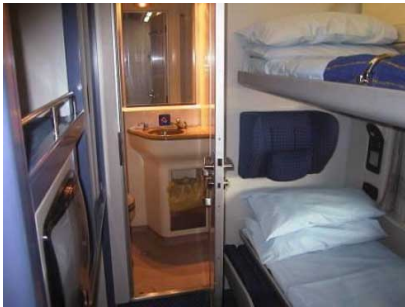

*predicted*

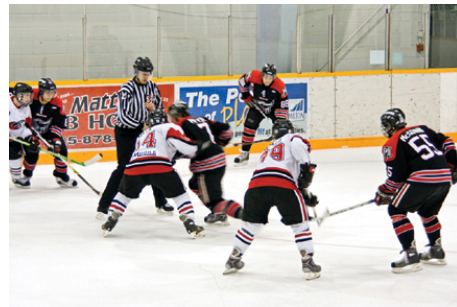

*random control*

darkness

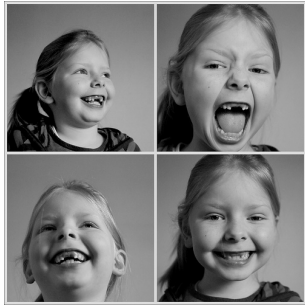

*predicted*

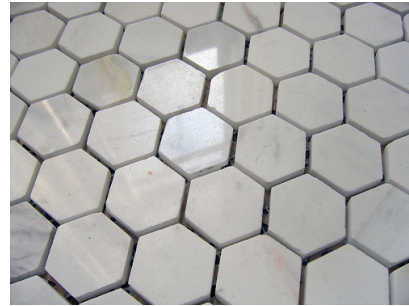

*random control*

bravery

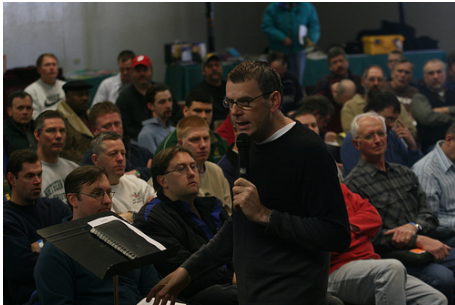

*predicted*

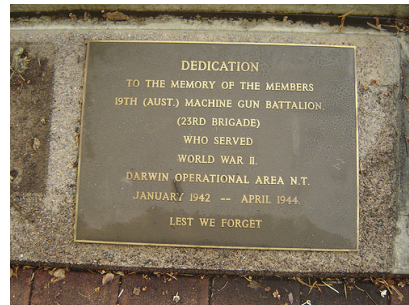

*random control*

folk

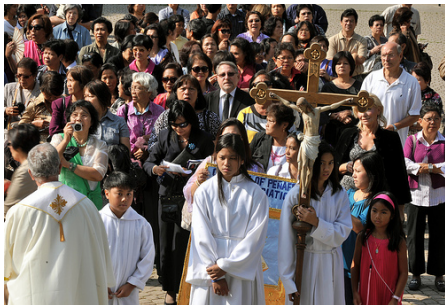

*predicted*

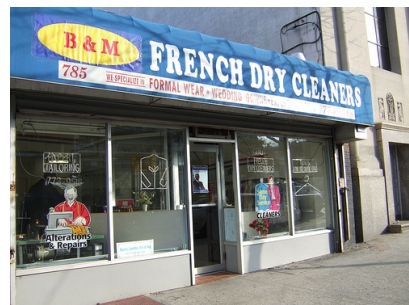

*random control*



viewing

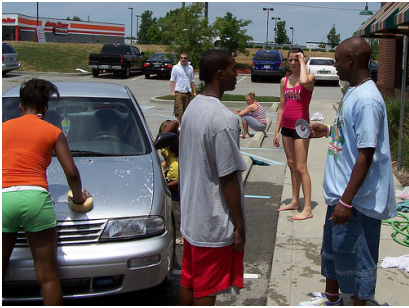

*predicted*

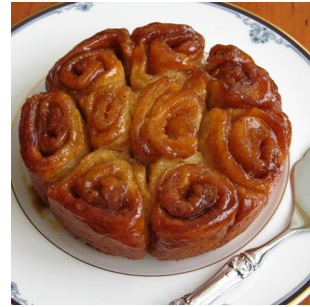

*random control*

distraction

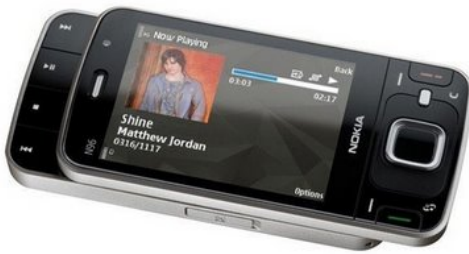

*predicted*

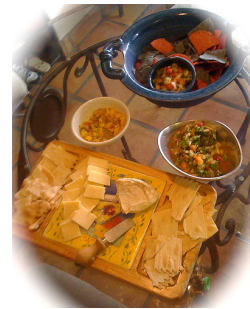

*random control*

loss

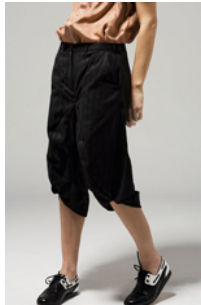

*predicted*

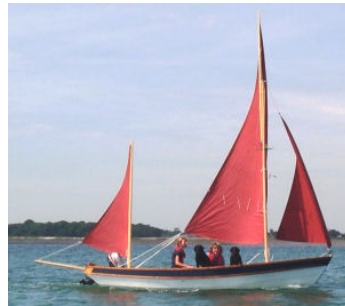

*random control*

dependent

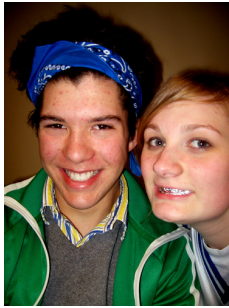

*predicted*

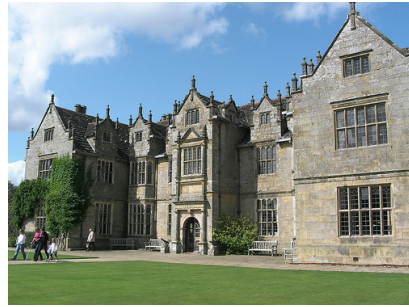

*random control*

rookie

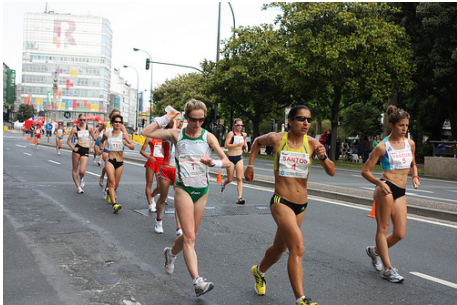

*predicted*

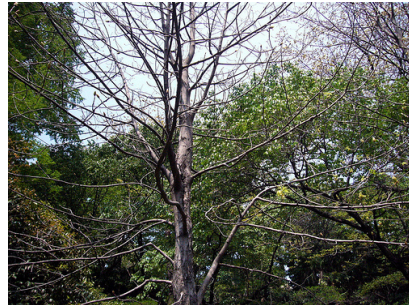

*random control*

hoax

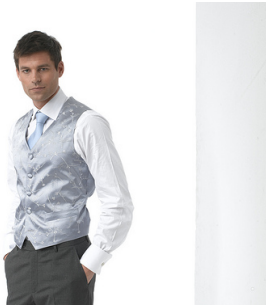

*predicted*

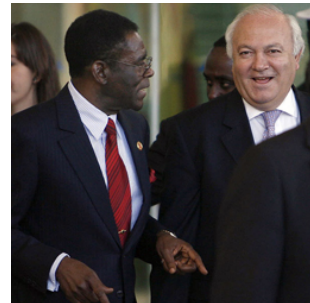

*random control*

handshake

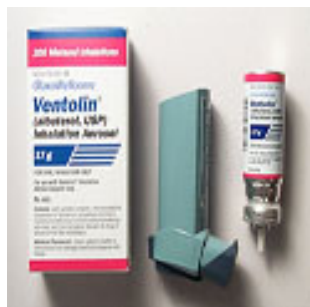

*predicted*

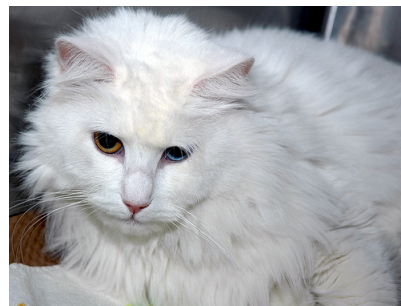

*random control*

auxiliary

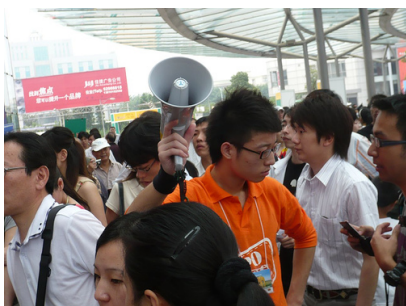

*predicted*

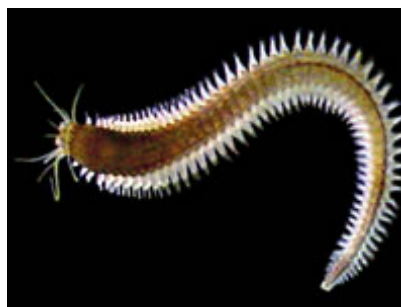

*random control*

airline

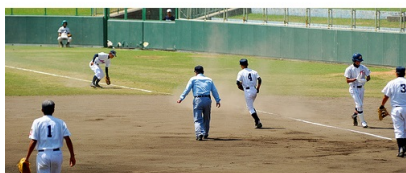

*predicted*

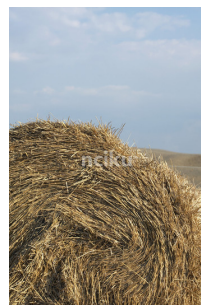

*random control*

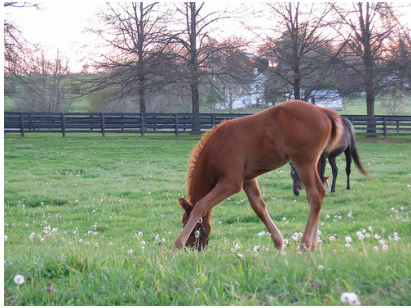

*predicted*

keeper

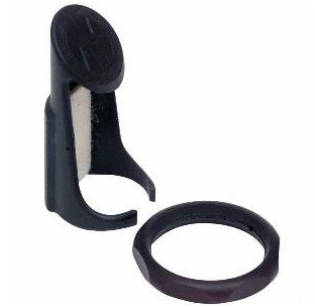

*random control*

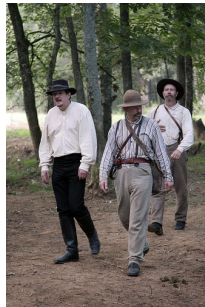

*predicted*

troop

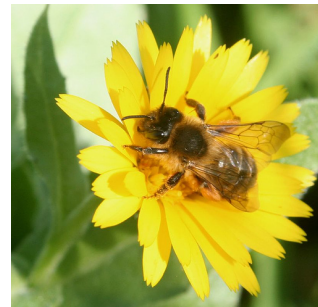

*random control*

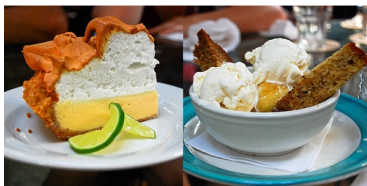

*predicted*

cake

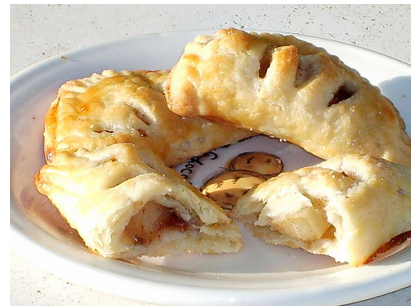

*random control*

schedule

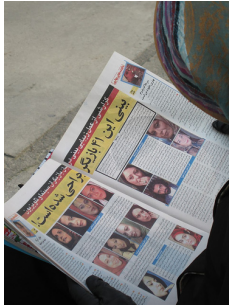

*predicted*

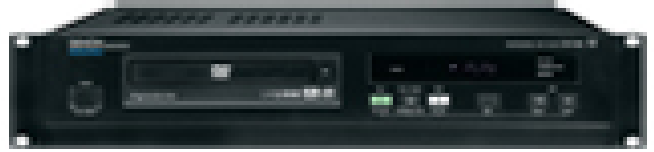

*random control*

bookie

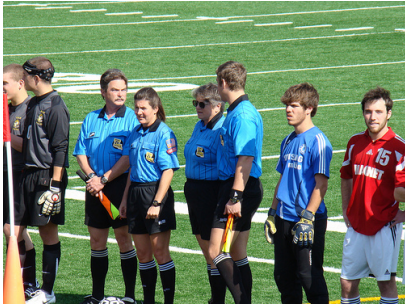

*predicted*

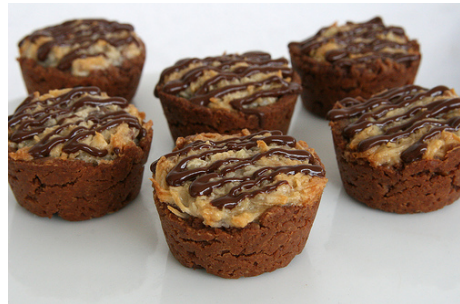

*random control*

cola

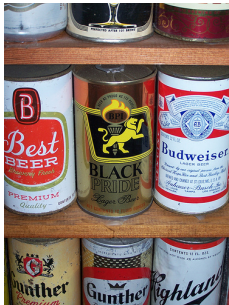

*predicted*

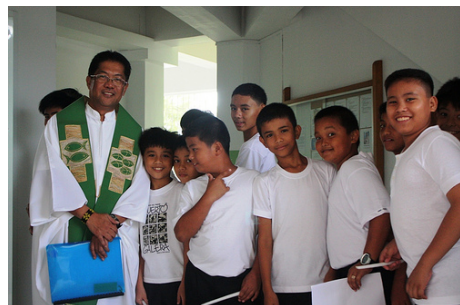

*random control*

overseas

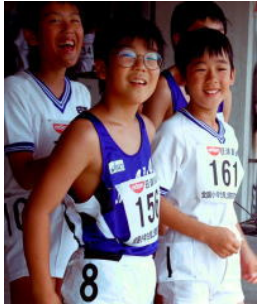

*predicted*

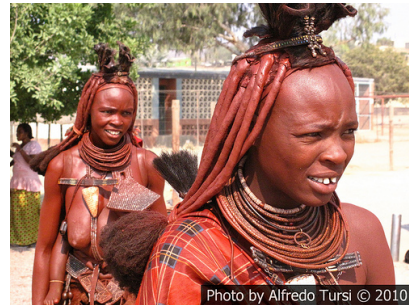

*random control*

saline

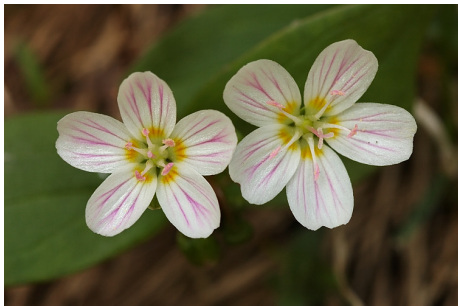

*predicted*

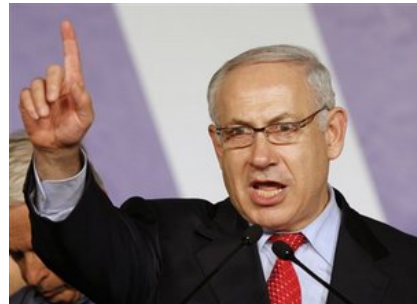

*random control*

joke

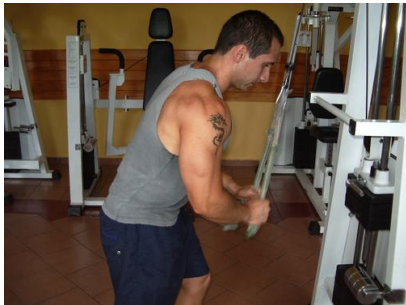

*predicted*

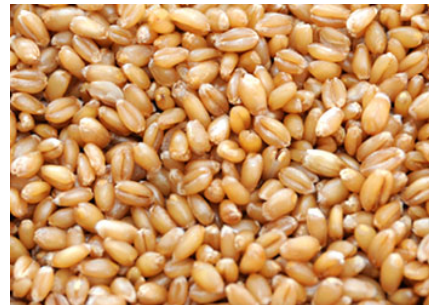

*random control*

**product**

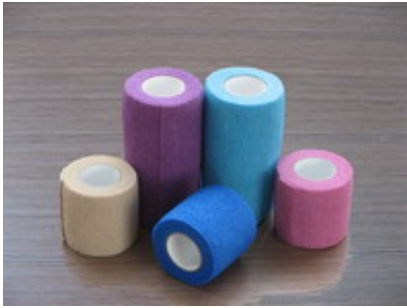

*predicted*

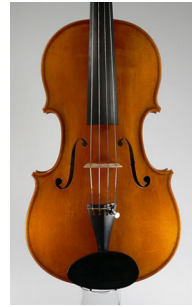

*random control*

**romance**

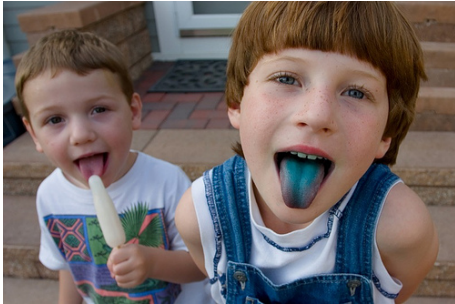

*predicted*

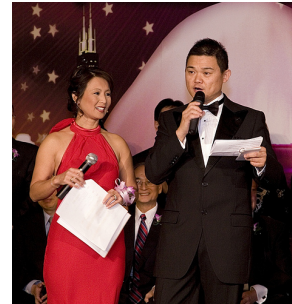

*random control*

**platoon**

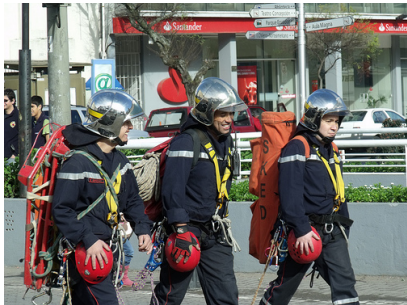

*predicted*

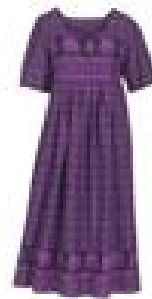

*random control*

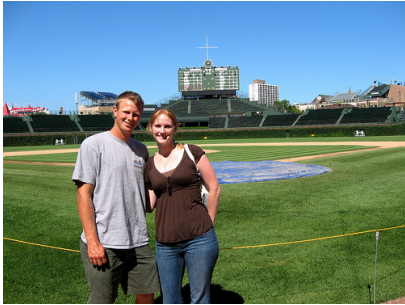

*predicted*

**arena**

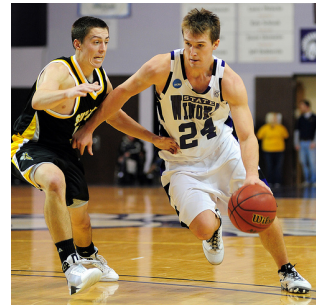

*random control*

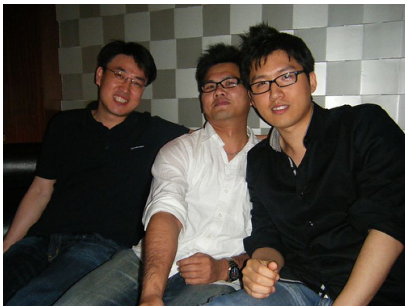

*predicted*

**invitation**

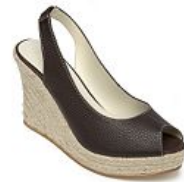

*random control*

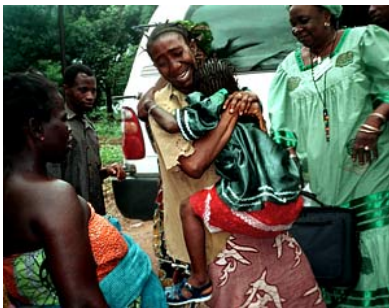

*predicted*

**bandit**

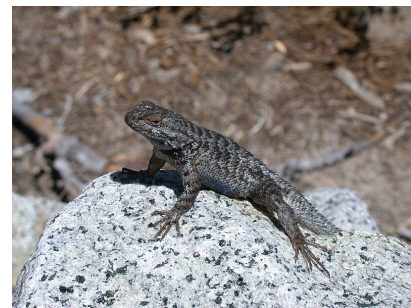

*random control*



collateral

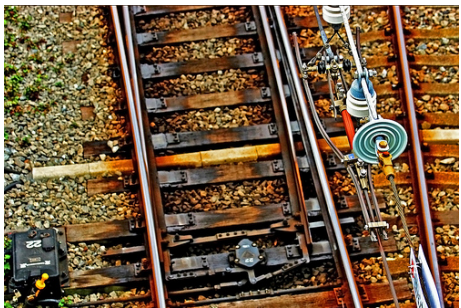

*predicted*

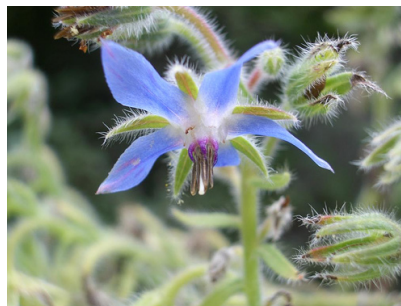

*random control*

slit

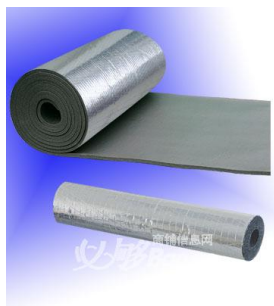

*predicted*

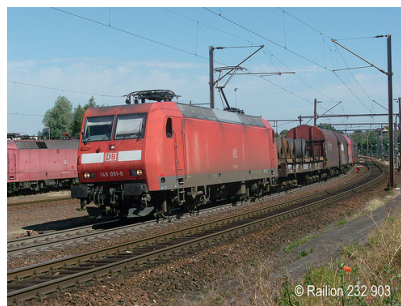

*random control*

hint

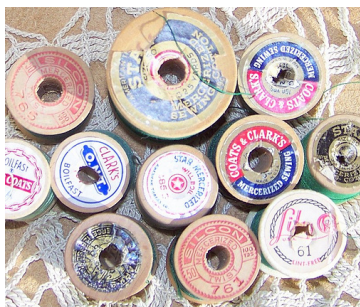

*predicted*

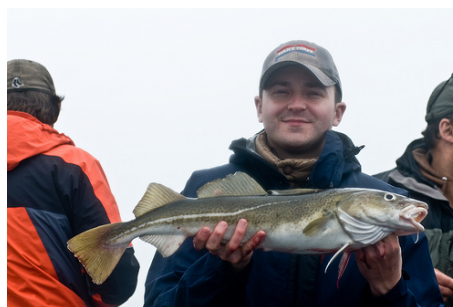

*random control*

recruiting

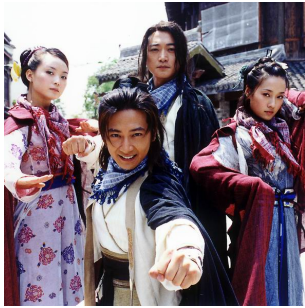

*predicted*

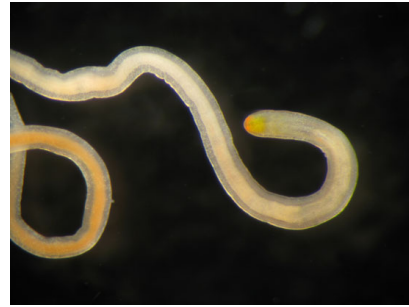

*random control*

expertise

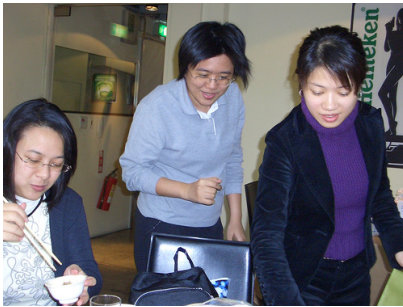

*predicted*

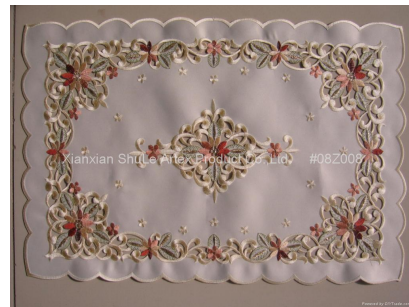

*random control*

wallpaper

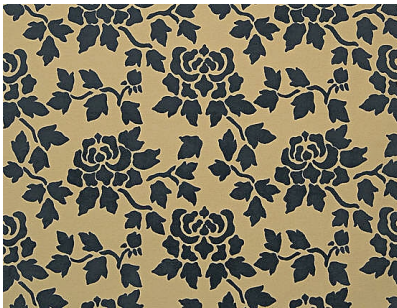

*predicted*

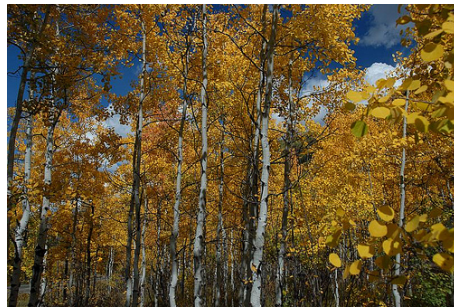

*random control*

ninety

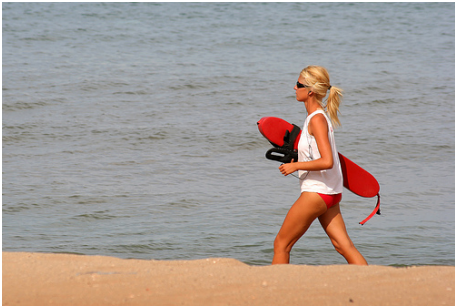

*predicted*

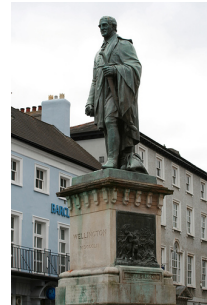

*random control*

funding

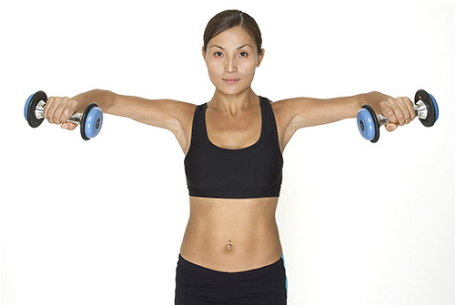

*predicted*

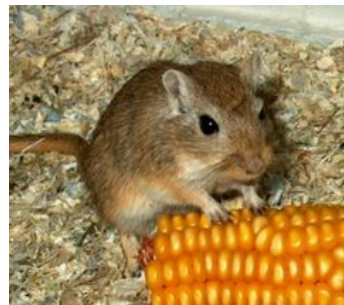

*random control*

gateway

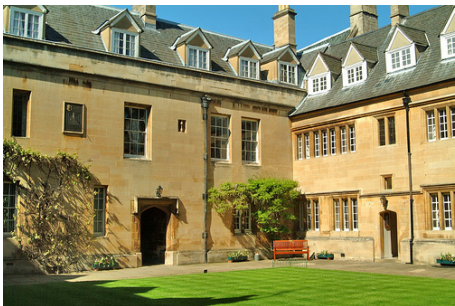

*predicted*

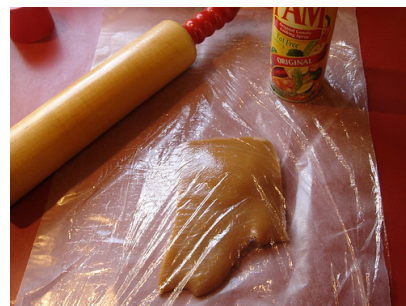

*random control*

demon

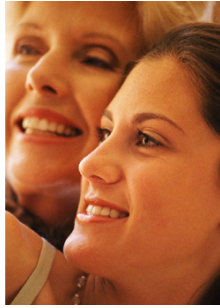

*predicted*

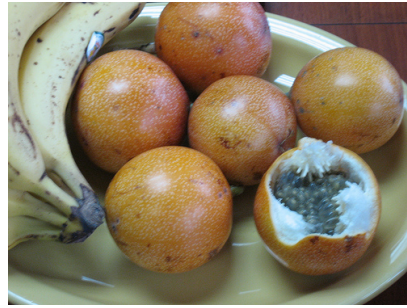

*random control*

watering

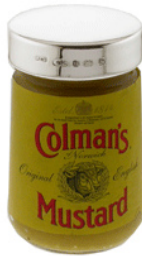

*predicted*

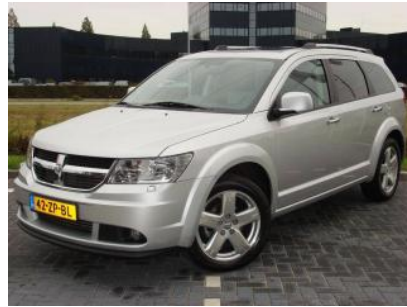

*random control*

freeze

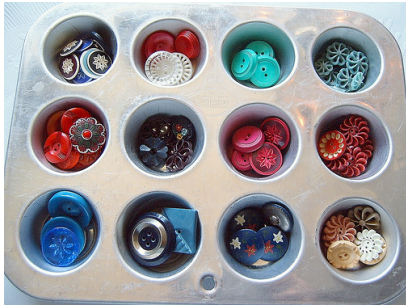

*predicted*

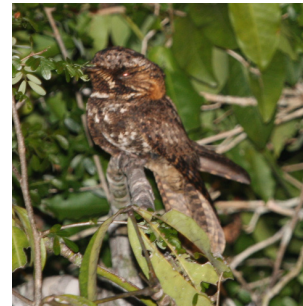

*random control*

brook

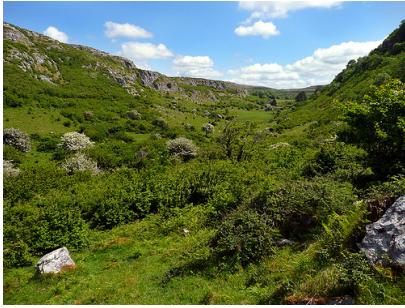

*predicted*

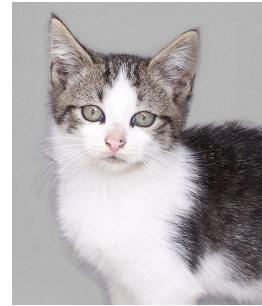

*random control*

congratulations

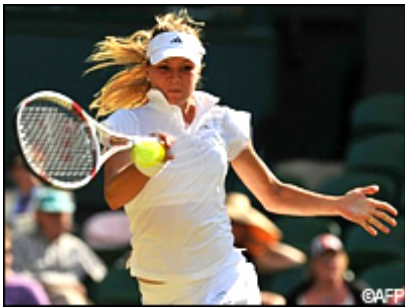

*predicted*

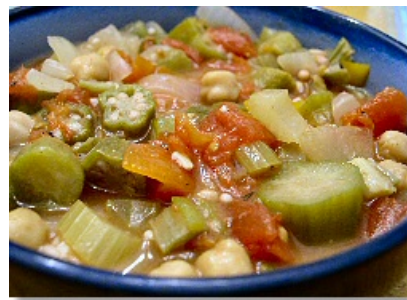

*random control*

apology

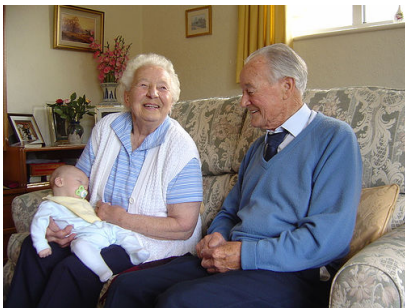

*predicted*

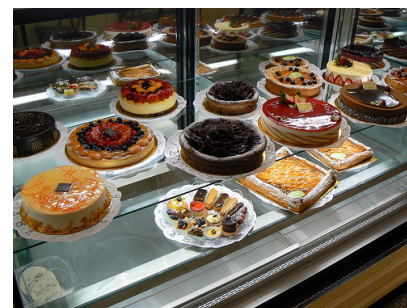

*random control*

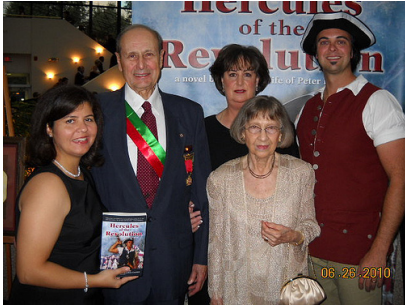

*predicted*

audition

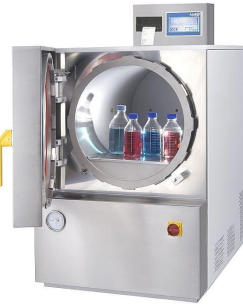

*random control*

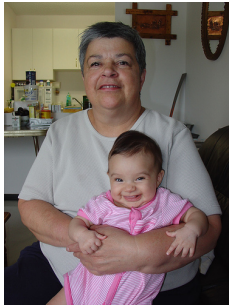

*predicted*

humility

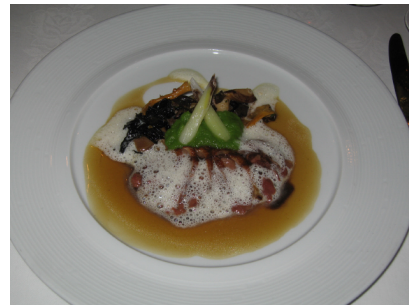

*random control*

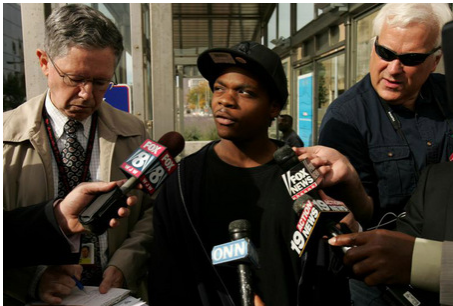

*predicted*

objection

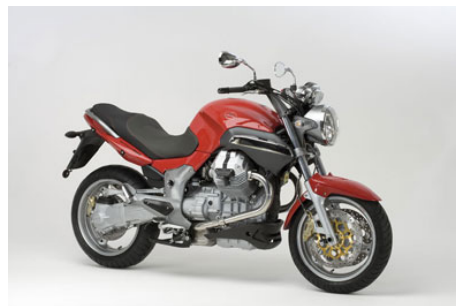

*random control*

government

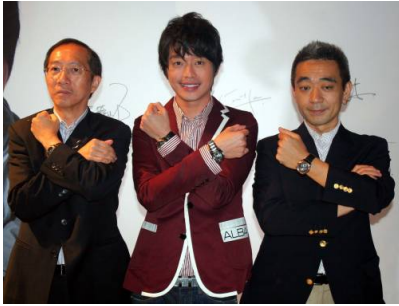

*predicted*

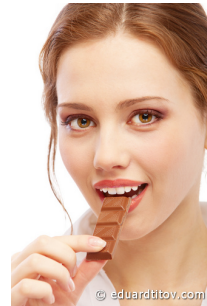

*random control*

blame

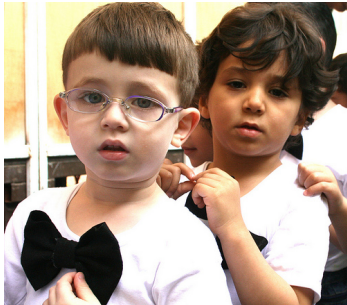

*predicted*

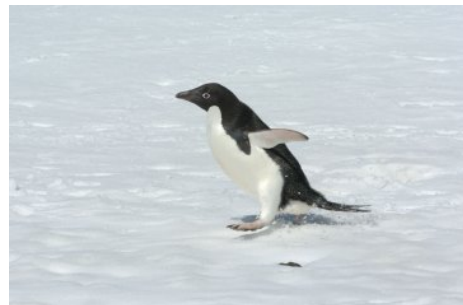

*random control*

ware

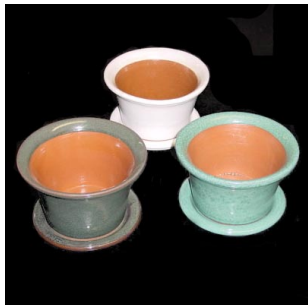

*predicted*

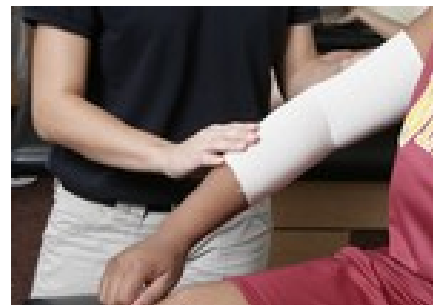

*random control*

poem

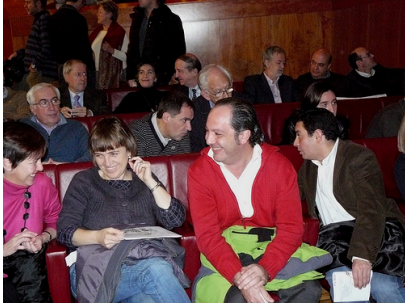

*predicted*

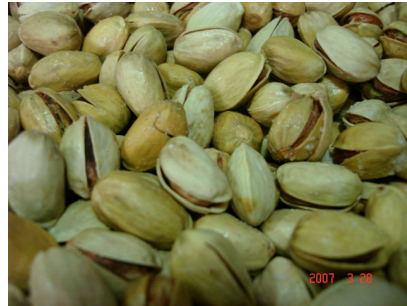

*random control*

telegram

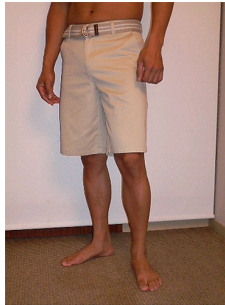

*predicted*

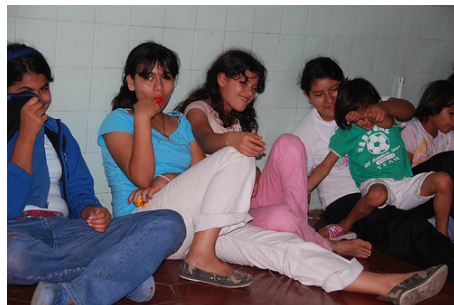

*random control*

gale

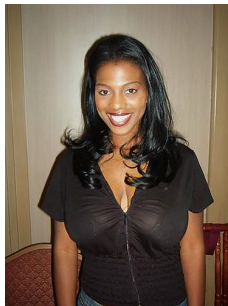

*predicted*

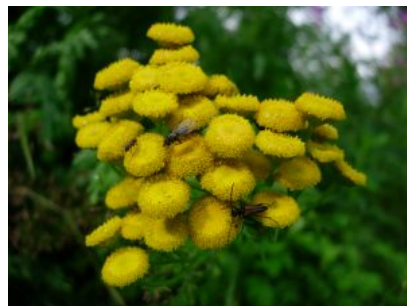

*random control*



**conflict**

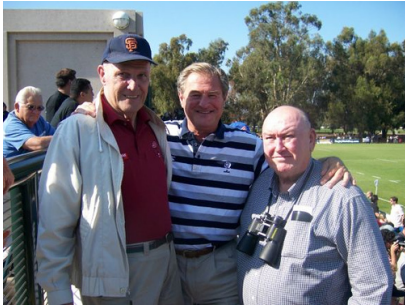

*predicted*

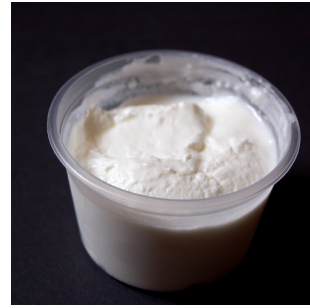

*random control*

**hate**

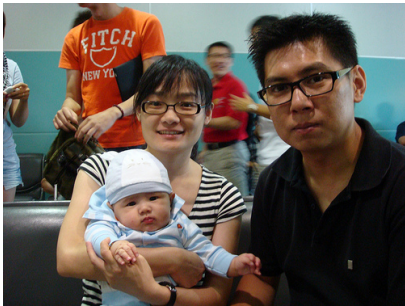

*predicted*

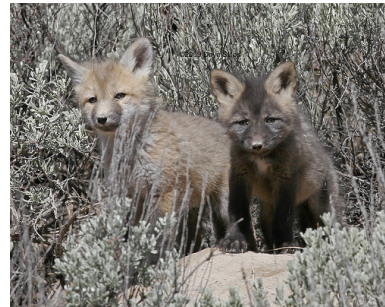

*random control*

**crank**

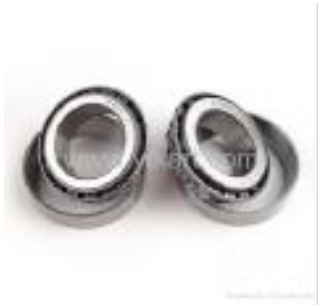

*predicted*

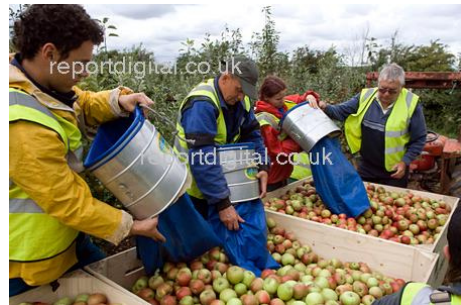

*random control*

fate

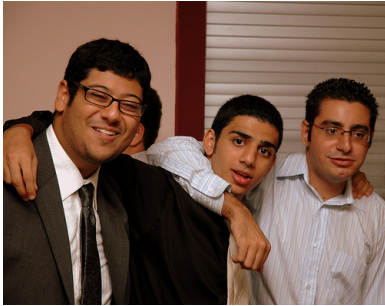

*predicted*

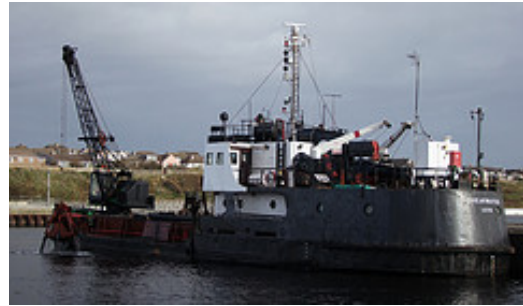

*random control*

bogey

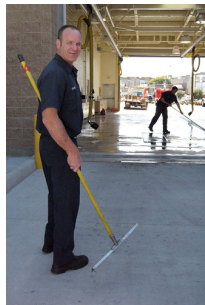

*predicted*

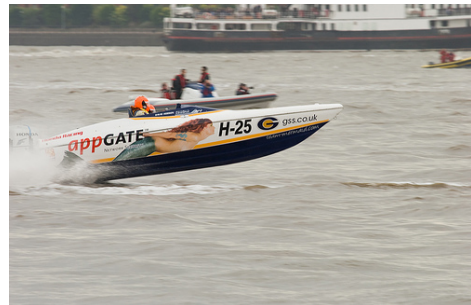

*random control*

inventory

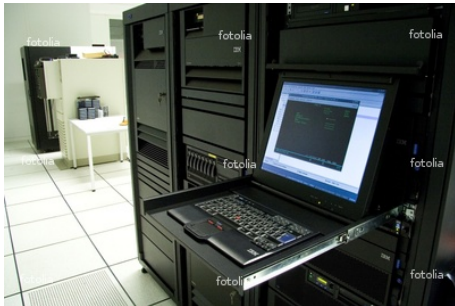

*predicted*

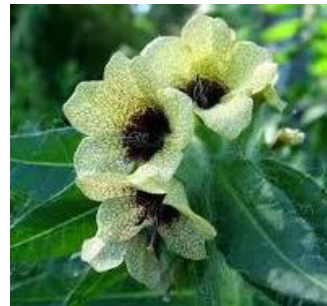

*random control*

testimony

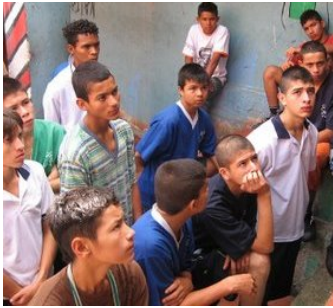

*predicted*

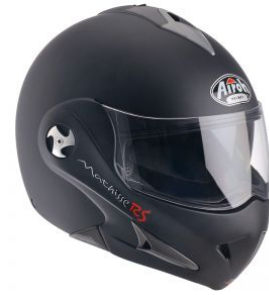

*random control*

discretion

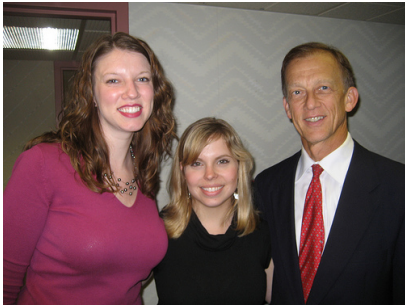

*predicted*

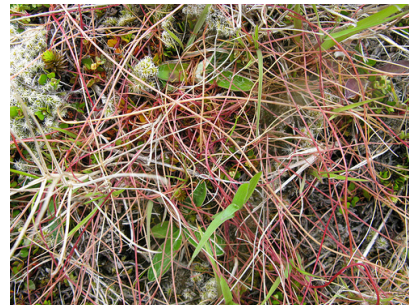

*random control*

rewrite

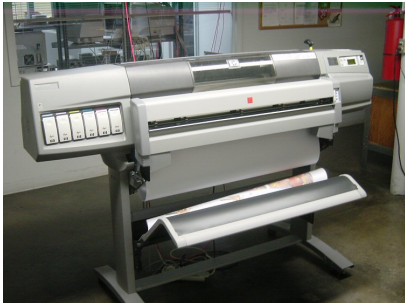

*predicted*

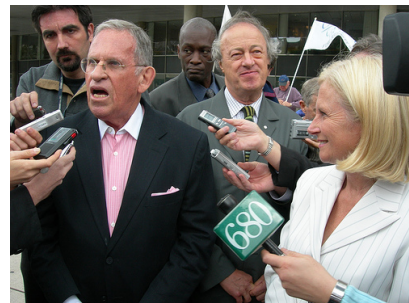

*random control*

plenty

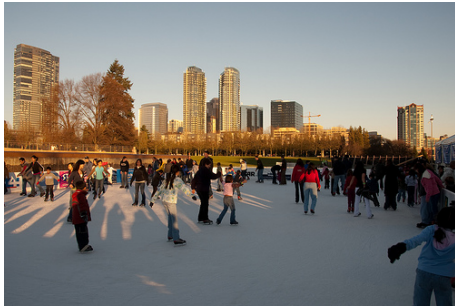

*predicted*

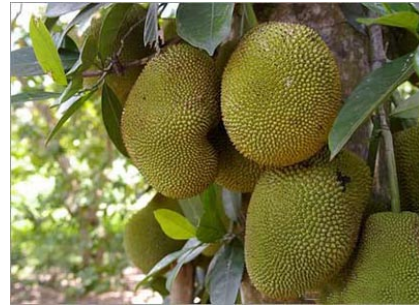

*random control*

fag

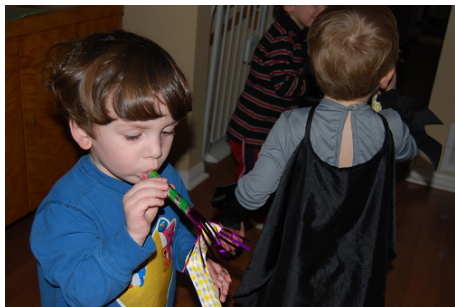

*predicted*

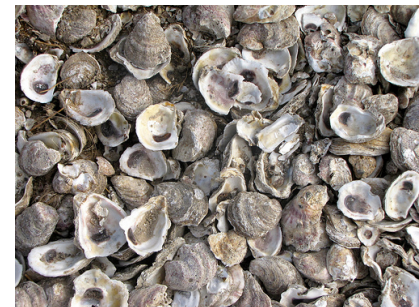

*random control*

freight

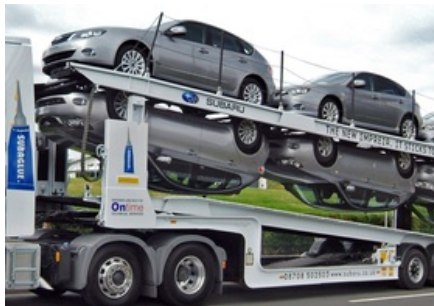

*predicted*

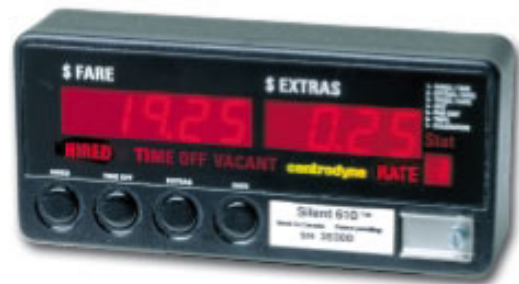

*random control*

superhero

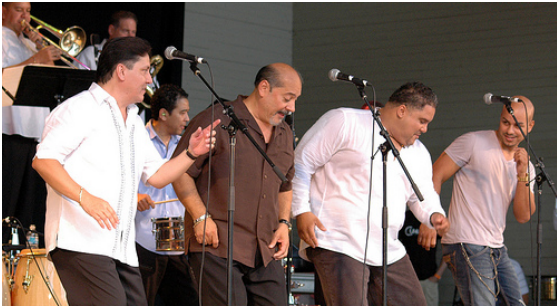

*predicted*

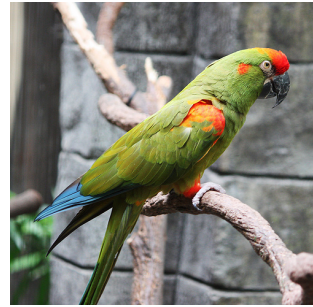

*random control*

happening

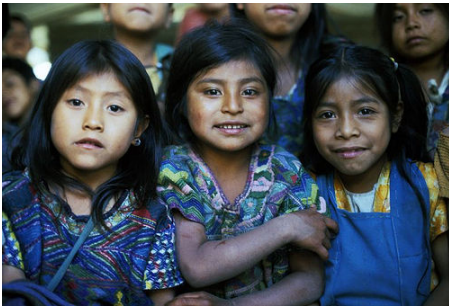

*predicted*

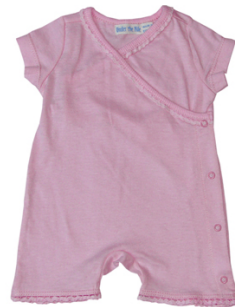

*random control*

bookstore

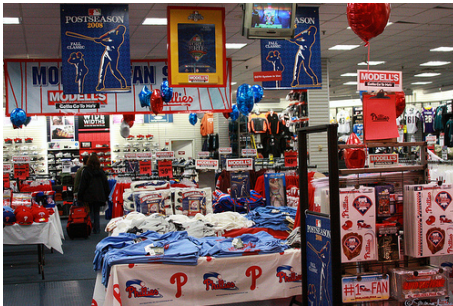

*predicted*

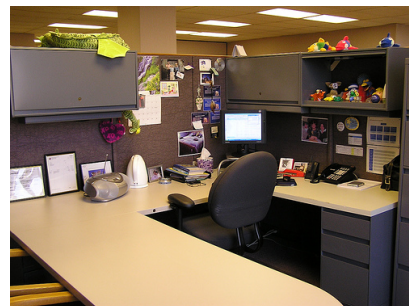

*random control*

tong

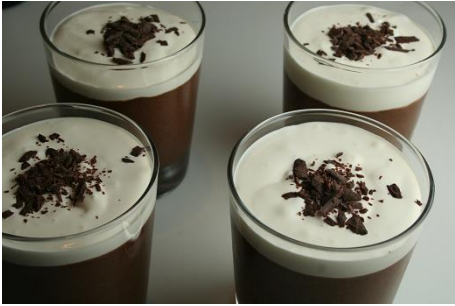

*predicted*

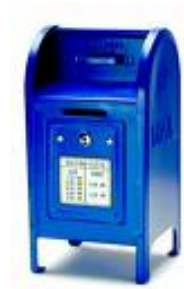

*random control*

maneuver

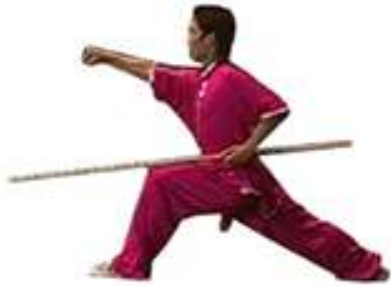

*predicted*

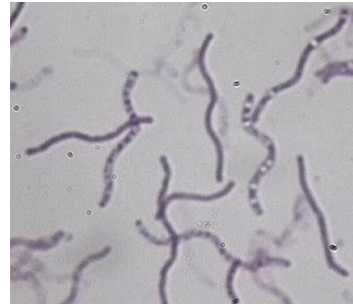

*random control*

maturity

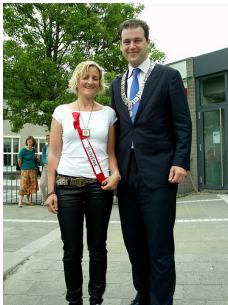

*predicted*

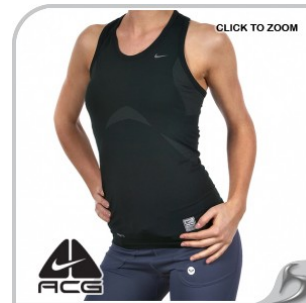

*random control*

serial

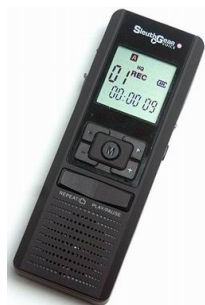

*predicted*

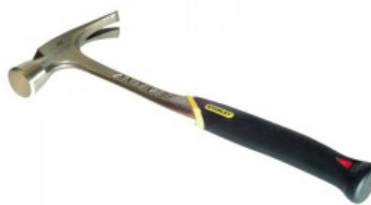

*random control*

mating

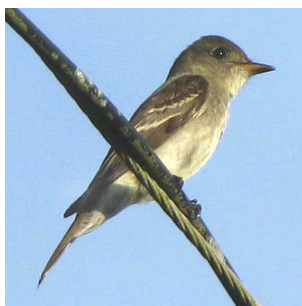

*predicted*

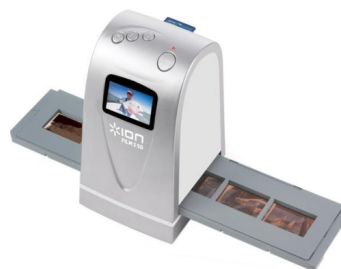

*random control*

impulse

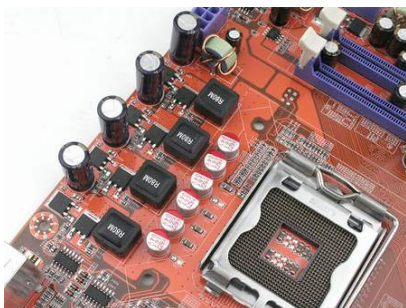

*predicted*

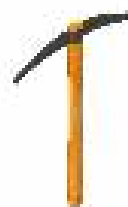

*random control*

risk

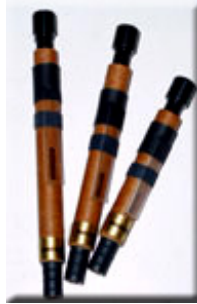

*predicted*

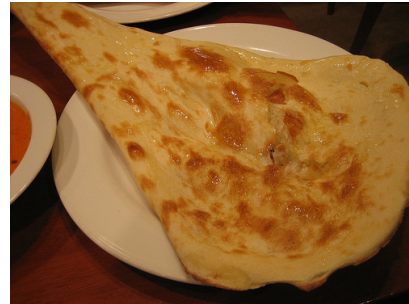

*random control*

survey

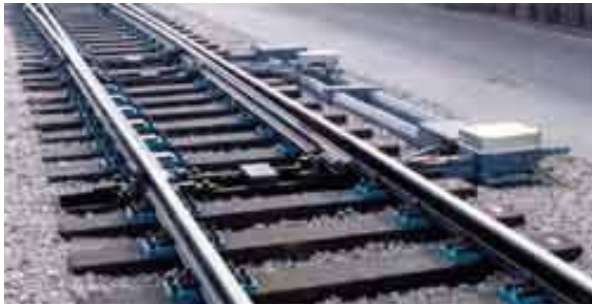

*predicted*

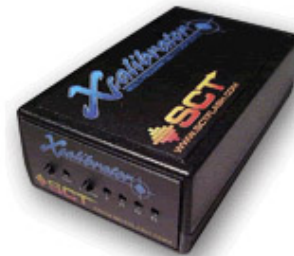

*random control*

page

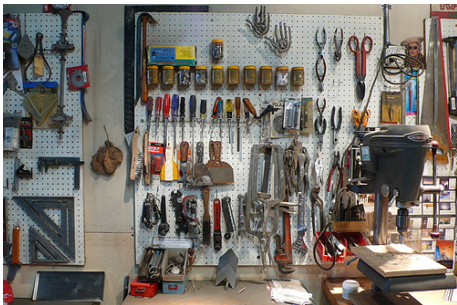

*predicted*

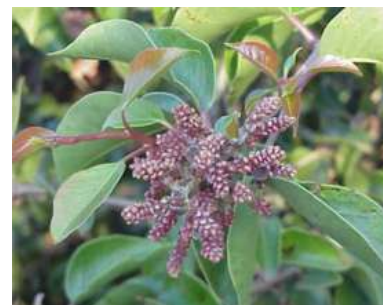

*random control*



**pregnancy**

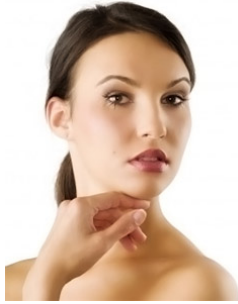

*predicted*

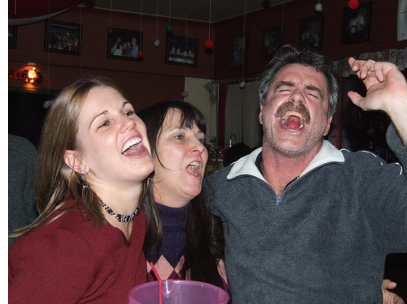

*random control*

**success**

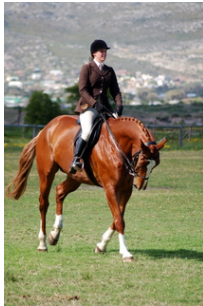

*predicted*

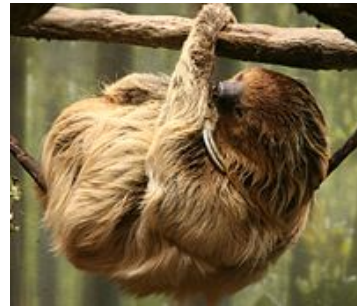

*random control*

**ambition**

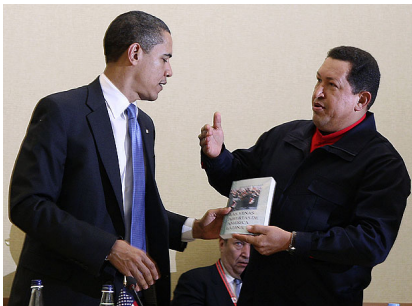

*predicted*

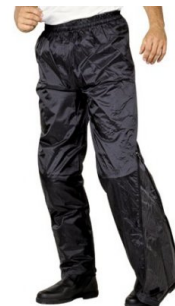

*random control*

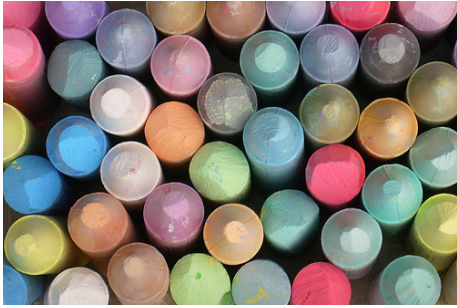

*predicted*

dice

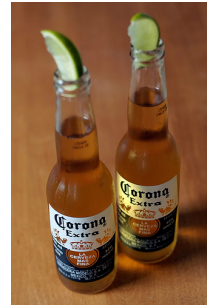

*random control*

eye

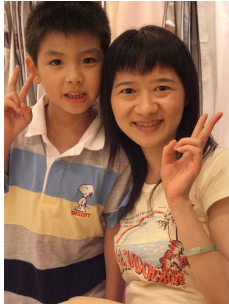

*predicted*

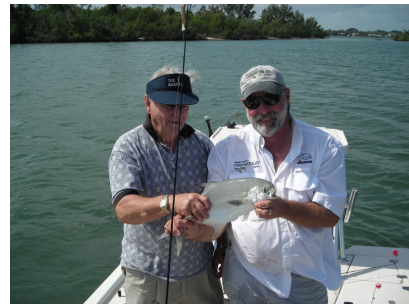

*random control*

envy

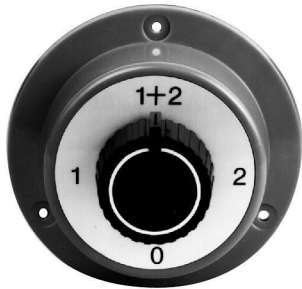

*predicted*

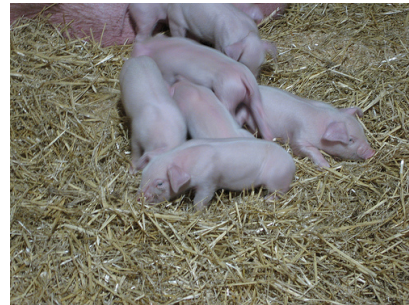

*random control*

pornography

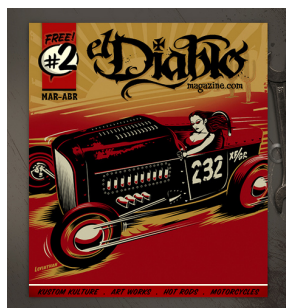

*predicted*

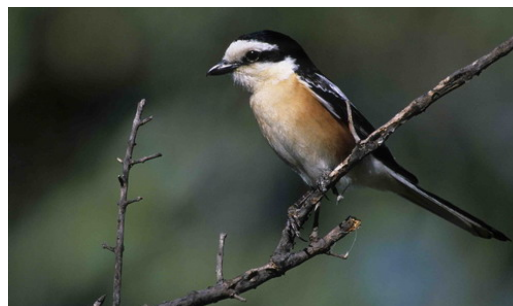

*random control*

whiskey

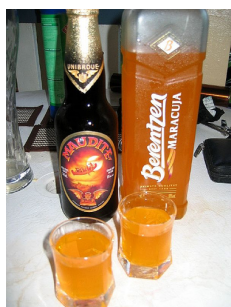

*predicted*

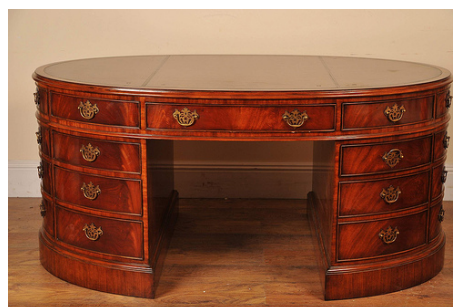

*random control*

disturbance

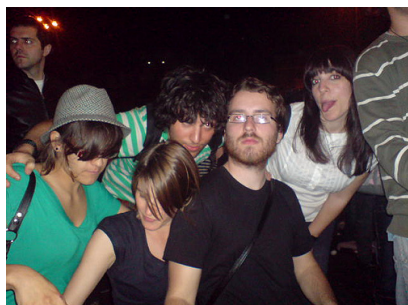

*predicted*

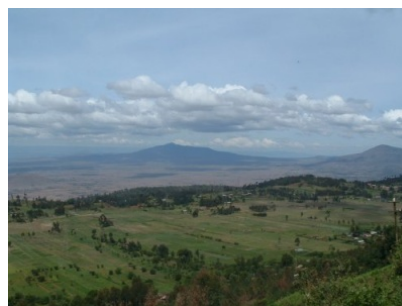

*random control*

**manhood**

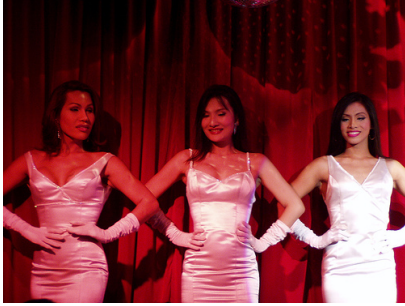

*predicted*

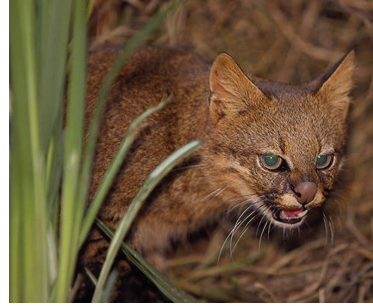

*random control*

**premiere**

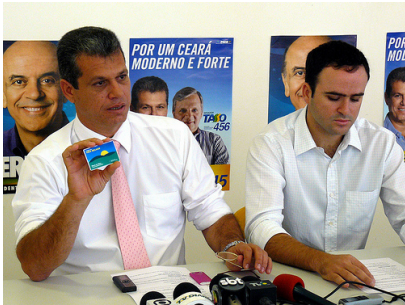

*predicted*

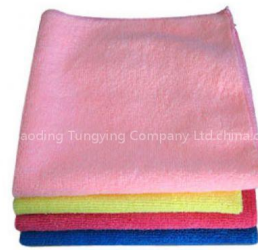

*random control*
